# Supplementary material for: A Patient-Derived Xenograft Model of Dedifferentiated Endometrial Carcinoma: A Proof-of-Concept Study for the Identification of New Molecularly Informed Treatment Approaches
Source: MDPI journal article supplement (doi:10.3390/cancers13235962), 2021-11-26
Supplement: s1 [file s1]

# A Patient-Derived Xenograft Model of Dedifferentiated Endometrial Carcinoma: A Proof-Of-Concept Study for the Identification of New Molecularly Informed Treatment Approaches

Chiao-Yun Lin, Ren-Chin Wu, Chen-Yang Huang, Chyong-Huey Lai, An-Shine Chao, Hsin-Pai Li, Chia-Lung Tsai, Elizabeth Joo-Wen Kuek, Cheng-Lung Hsu, Angel Chao

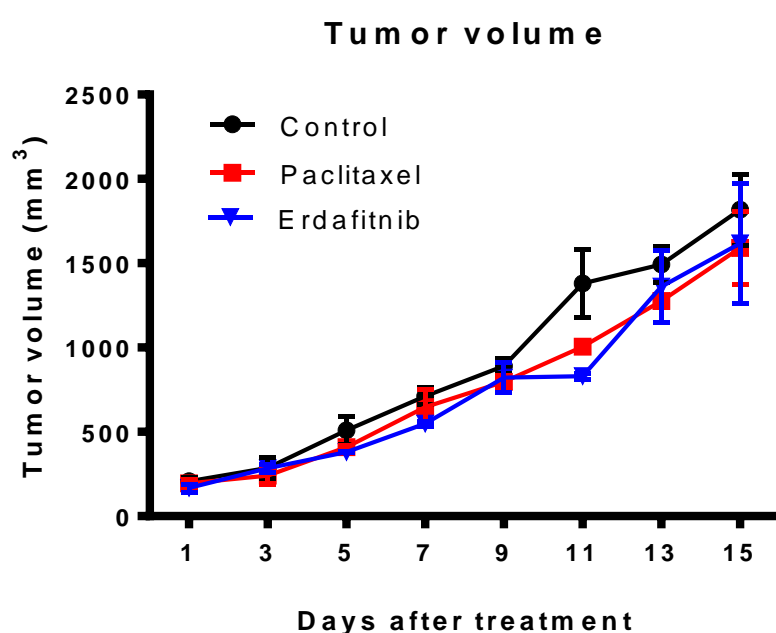

**Figure S1.** Tumor volume analysis of druggable molecular target in PDX-mLung. PDX-mLung mice were randomized (n = 2 per group) to receive standard platinum-based drug paclitaxel (10 mg/kg given intraperitoneally one day per week), and the fibroblast growth factor receptor inhibitor erdafitinib (15 mg/kg given orally five days per week).

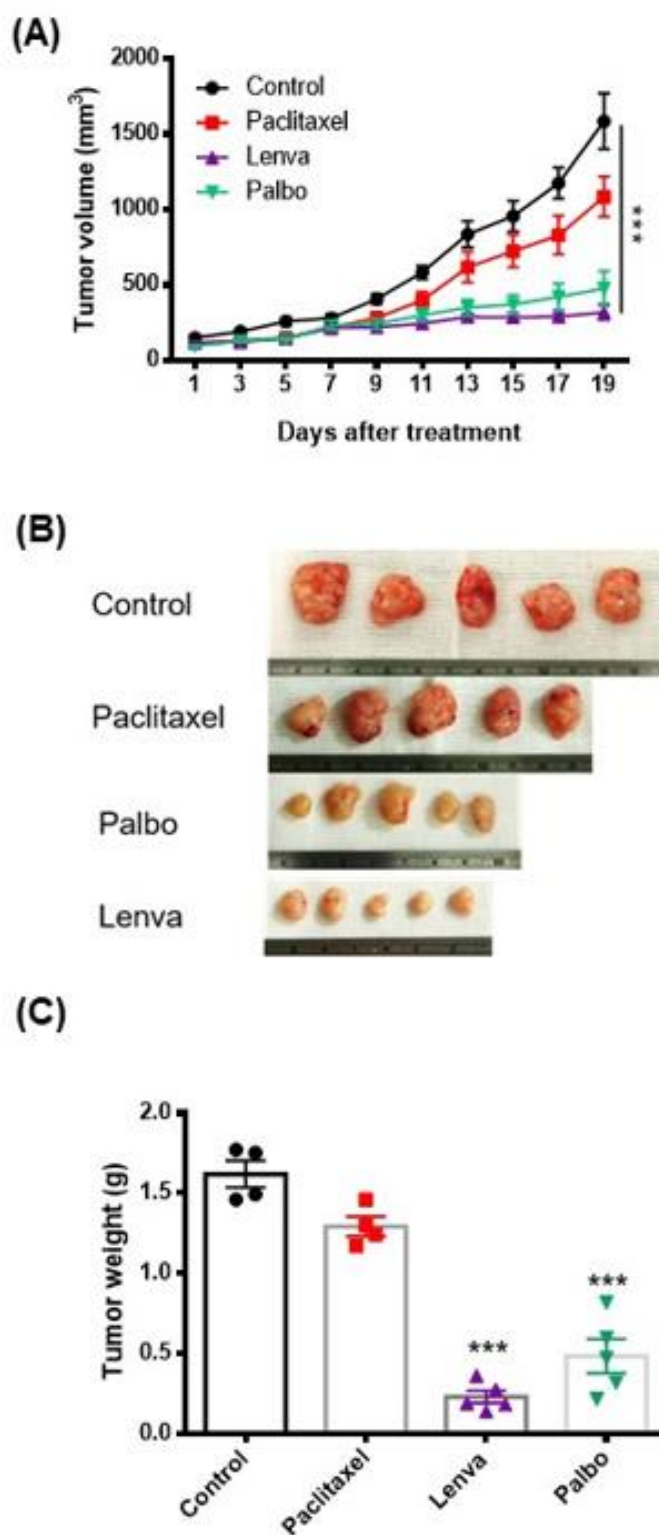

**Figure S2.** Identification of druggable molecular targets in PDX-mLung. PDX-mLung mice were randomized ( $n = 5$  per group) to receive standard platinum-based drug paclitaxel (10 mg/kg given intraperitoneally one day per week), the fibroblast growth factor receptor inhibitor lenvatinib alone (10 mg/kg given orally five days per week), and the cell cycle inhibitor palbociclib alone (100 mg/kg given orally five days per week). **(A)** Tumor volume, **(B)** gross tumors, and **(C)** tumor weight changes of mice \*\*\*  $p < 0.0001$ .

**(A)**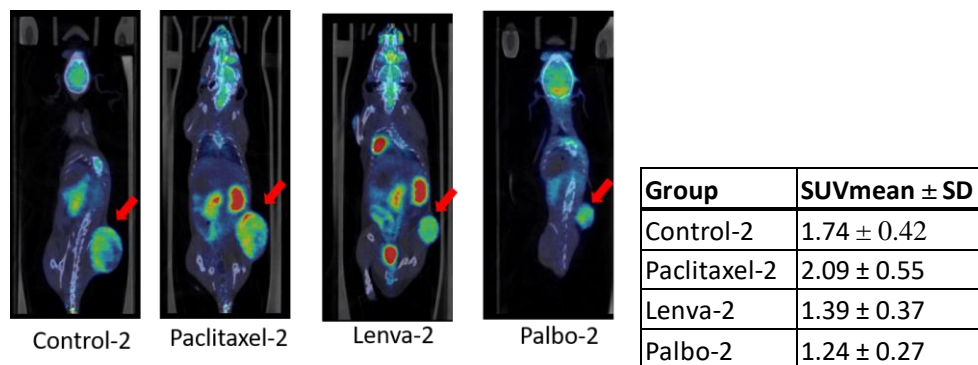**(B)**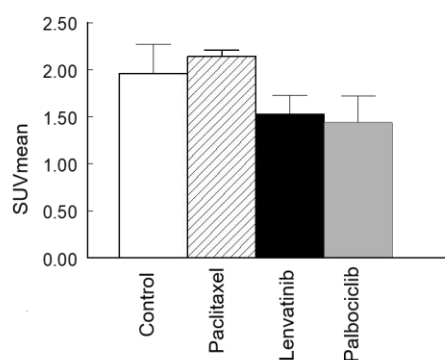

**Figure S3.** In vivo drug responses were observed using animal  $^{18}\text{F}$ -FDG PET imaging. **(A)** Whole-body  $^{18}\text{F}$ -FDG PET imaging was used to monitor tumor growth (red arrow) by calculating mean standardized uptake values (SUVmean) **(B)** Data shown represent mean  $\pm$  standard error and were derived from representative PET Imaging of PDX-mLung mice ( $n = 2$  per group). Lenva: lenvatinib; Palbo: Palbociclib.

(A)

**Lenvatinib vs. Control***EnhancedVolcano*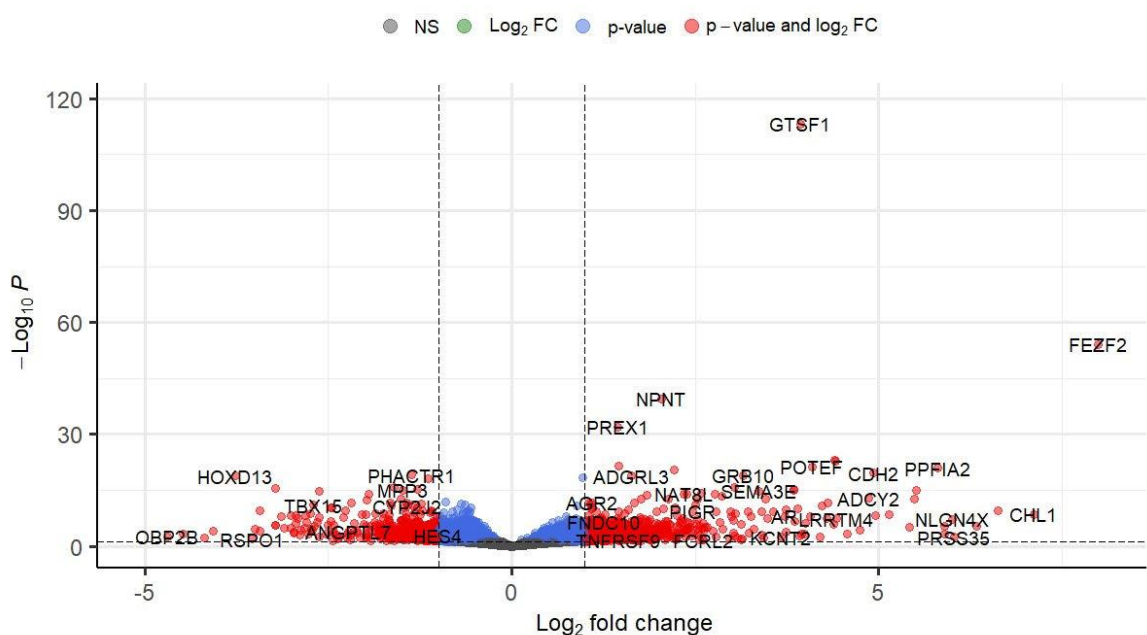

(B)

**Palbociclib vs. Control***EnhancedVolcano*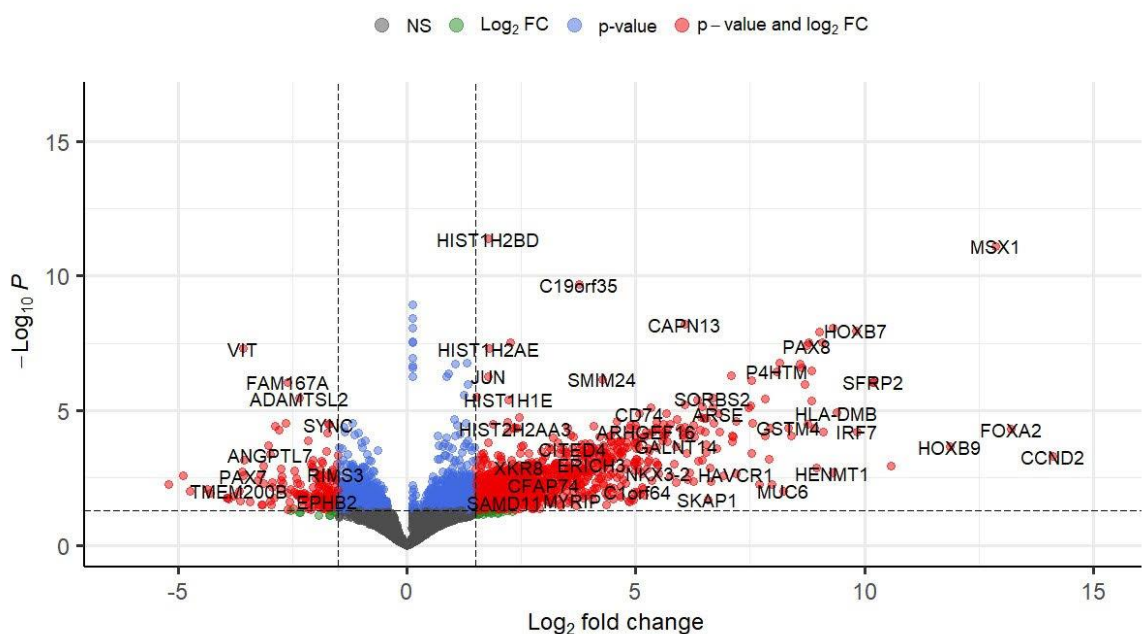

(C)

**Palbociclib+Lenvatinib vs. Control***EnhancedVolcano*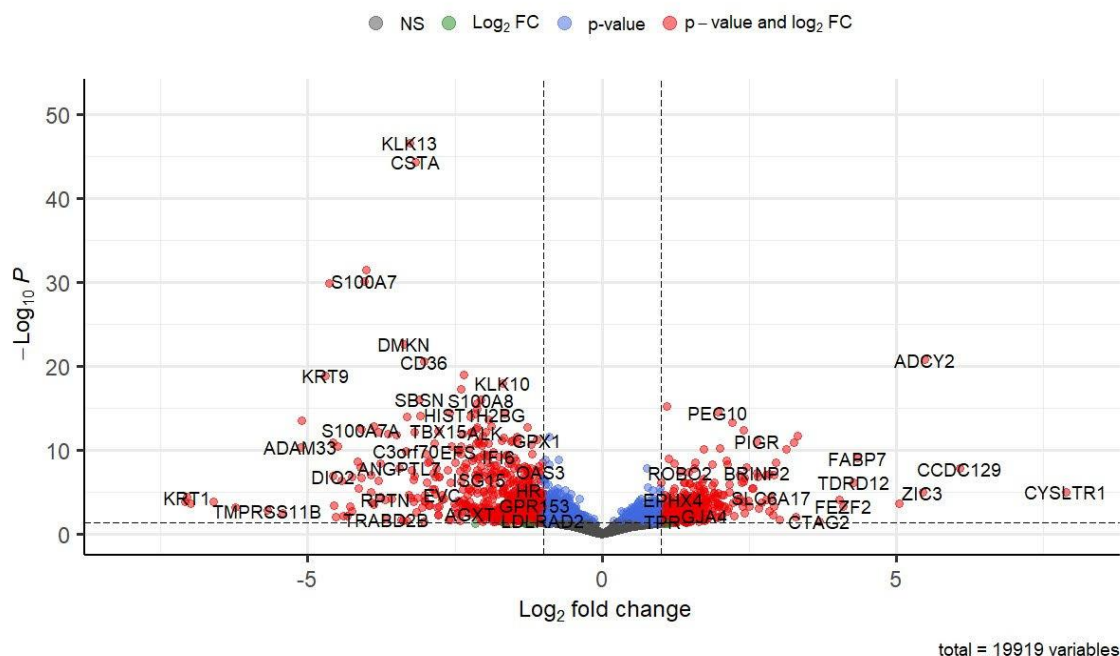

**Figure S4.** Differentially expressed genes of PDX-mLung treated with different drugs. **(A)** PDX-mLung treated with lenvatinib. Total number of significant differentially expressed (DE) genes are 1342 with log2 fold change (FC)  $\geq 1$  and adjusted  $p$  value  $< 0.05$ . **(B)** PDX-mLung treated with palbociclib. Total number of significant DE genes: 1384 with log2 FC  $\geq 1.5$  and adjusted  $p$  value  $< 0.05$ . **(C)** PDX-mLung treated with lenvatinib and palbociclib. Total number of significant DE genes: 1178 with log2 FC  $\geq 1$  and adjusted  $p$  value  $< 0.05$ . Raw gene count of all tumor samples is provided in Supplementary Table S3.

**Figure 2G**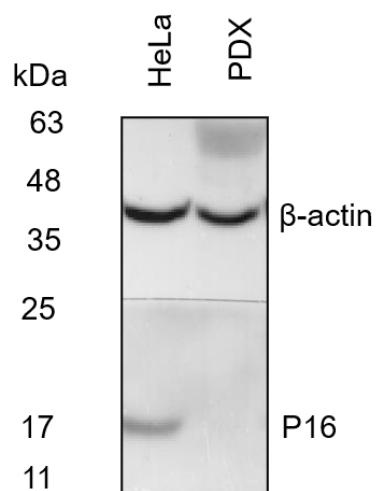**Figure 5B**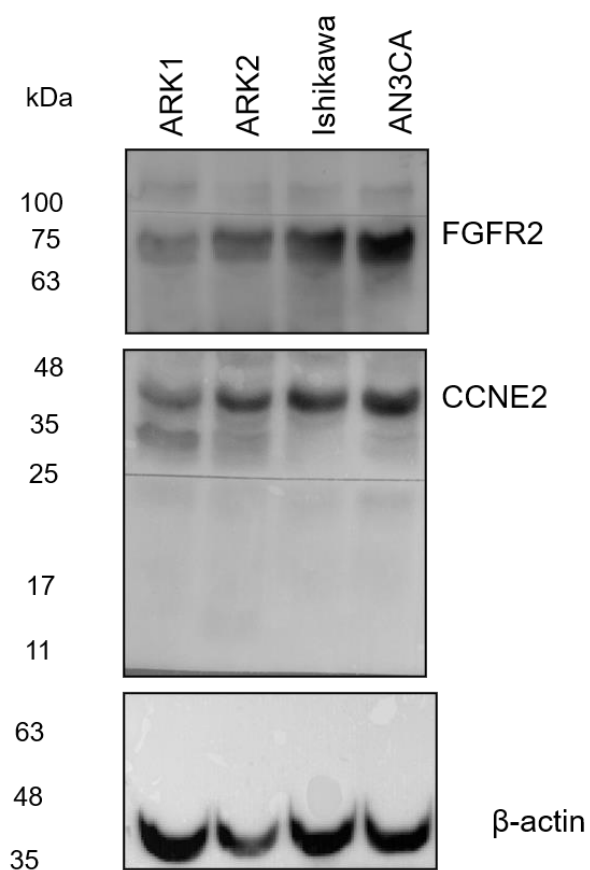

**Figure 5D**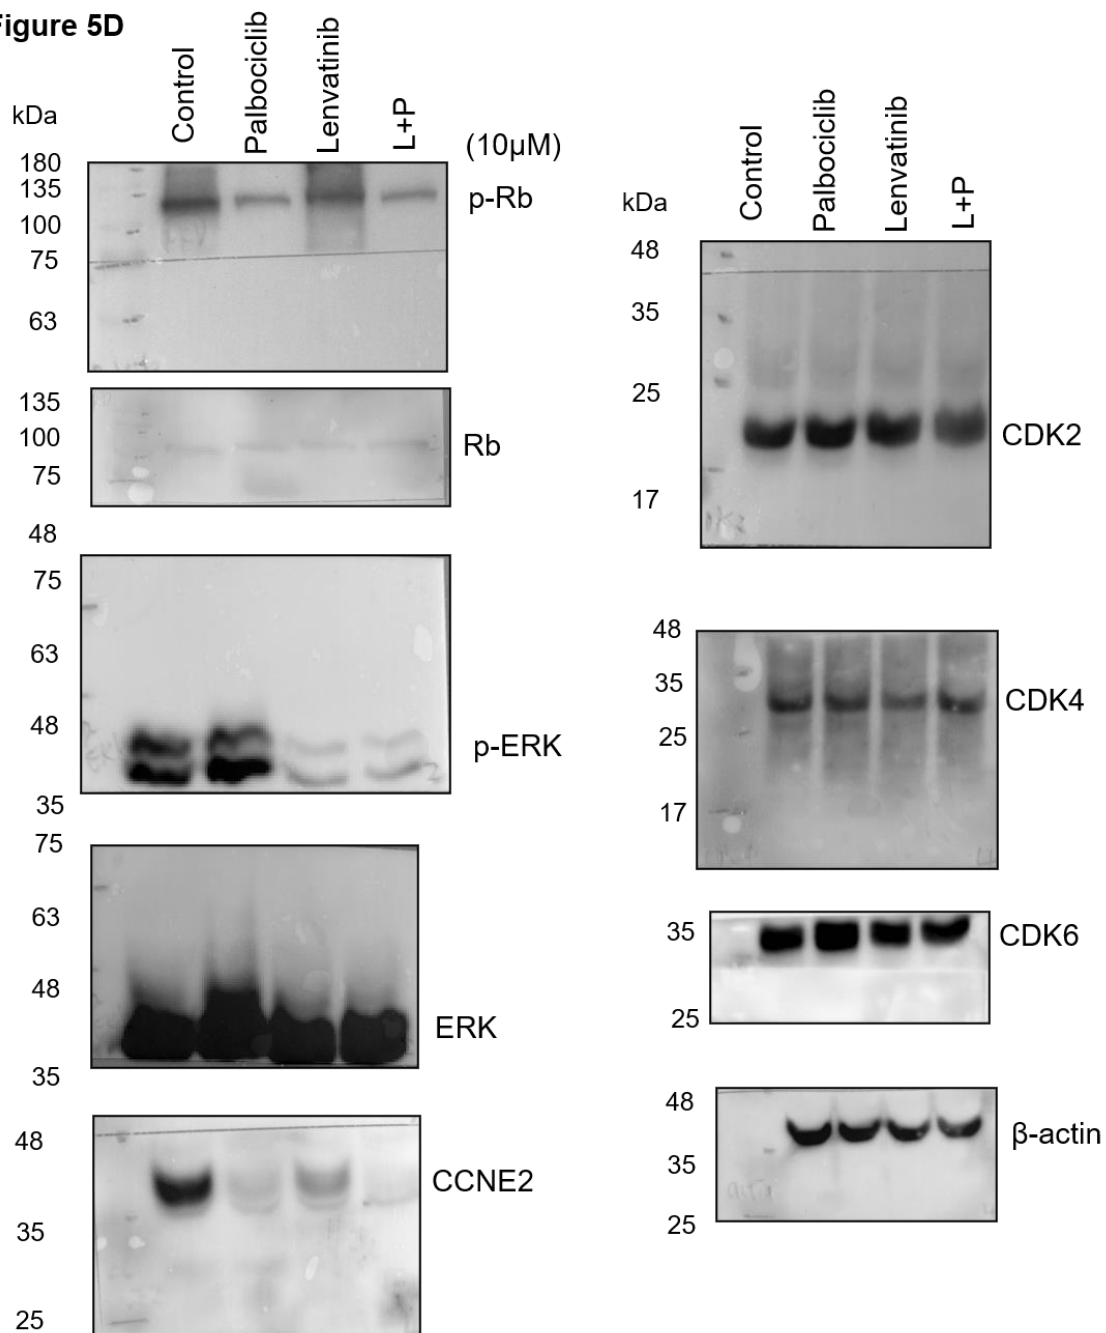

**Figure 5E**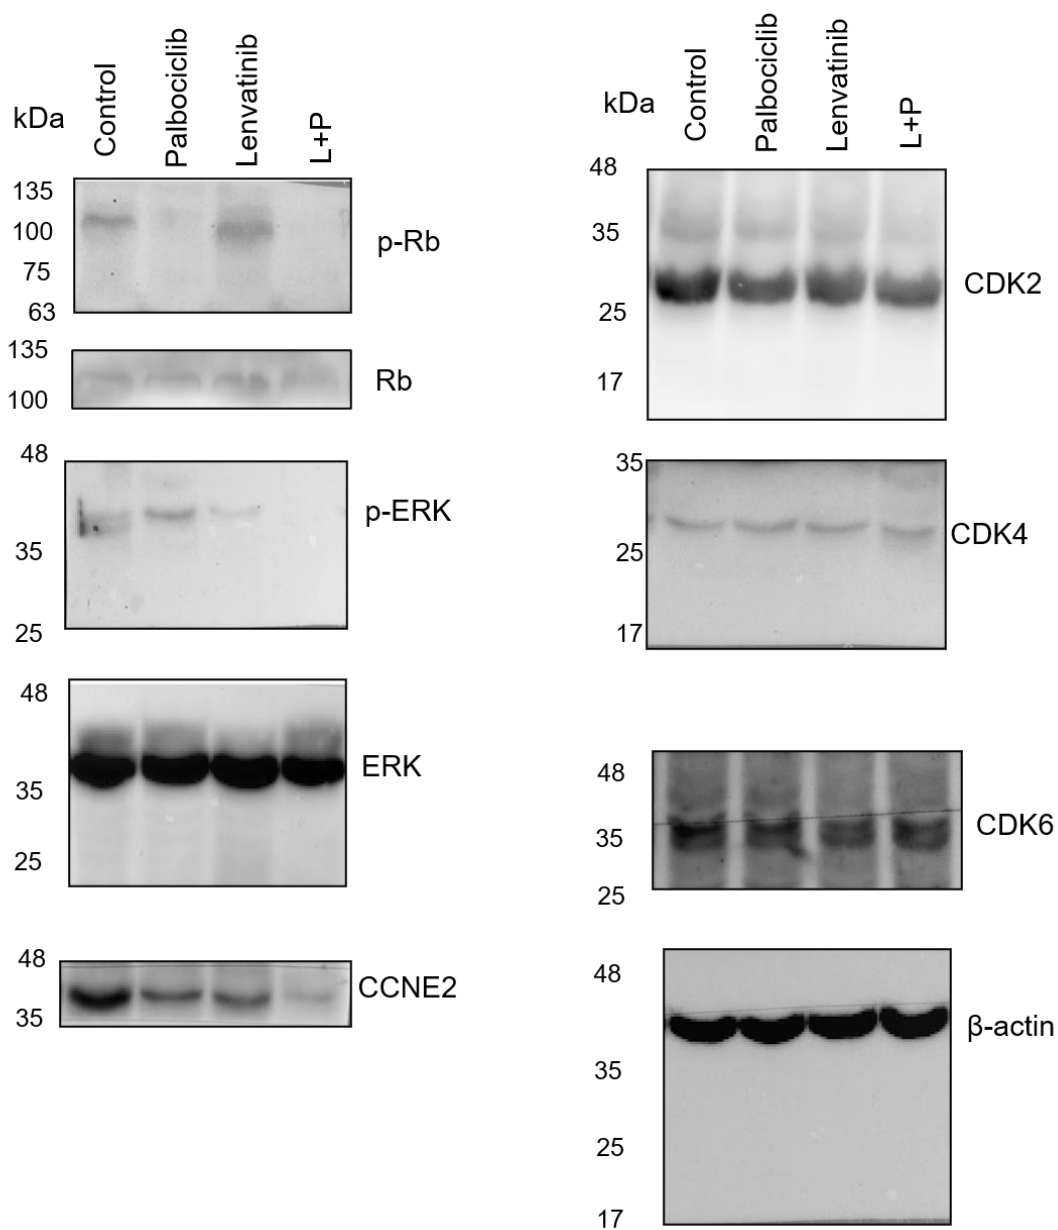**Figure S5.** The whole blot showing all the bands with all molecular weight markers on the Western as shown above.
