# Supplementary material for: A Patient-Derived Xenograft Model of Dedifferentiated Endometrial Carcinoma: A Proof-of-Concept Study for the Identification of New Molecularly Informed Treatment Approaches
Source: Cancers (Basel). 2021 Nov 26;13(23):5962. doi: 10.3390/cancers13235962 (PMC8656552; doi:10.3390/cancers13235962)
Supplement: Supplementary file 1 [file cancers-13-05962-s001.zip]

Archive with 5 entries (5 files):
- PDX_SUPPLEMENT_11132021.pdf
- Supplementary Table 2- tumor volume-11102021.xlsx
- TableS1_gene.mutation.catalog-S1-09282021.xlsx
- TableS3_RNAseq.design.reads.summary-S2-09282021.xlsx
- TableS4_RNAseq.design.reads.summary-S3-09282021.xlsx
