# Supplementary material for: A Patient-Derived Xenograft Model of Dedifferentiated Endometrial Carcinoma: A Proof-of-Concept Study for the Identification of New Molecularly Informed Treatment Approaches
Source: Cancers (Basel). 2021 Nov 26;13(23):5962. doi: 10.3390/cancers13235962 (PMC8656552; doi:10.3390/cancers13235962)
Supplement: Supplementary file 1 [file cancers-13-05962-s001.zip › Supplementary Table 2- tumor volume-11102021.xlsx]

## Sheet: raw data
	F9	Days after treatment
		Day 1			Day 3			Day 5			Day 7			Day 9			Day 11			tumor weight
3813	Control	7.55	6.37	153.178	9.75	9.11	404.586	10.79	9.28	464.609	11.34	10.79	660.125	12.8	10.69	731.367	14.84	12.03	1073.83	1.093
3823	Control	7.84	6.91	187.173	9.25	8.88	364.702	12.55	10.16	647.741	12.94	10.89	767.291	13.28	12.47	1032.53	15.07	13.9	1455.84	1.762
3841	Control	10.33	6.94	248.765	13.22	10.78	768.138	14.84	11.19	929.103	16.23	13.51	1481.15	17.2	13.4	1544.22	18.68	15.07	2121.16	2.909
3863	Control	6.83	6.54	146.065	8.24	8.07	268.315	9.6	9.06	394.001	11.08	9.85	537.505	13.01	10.88	770.025	13.67	11.19	855.852	1.144
2471	Control	8.42	7.44	233.039	12.72	9.91	624.604	12.68	9.32	550.708	15.18	11.22	955.493	16.35	12.24	1224.76	17.5	12.25	1313.05	1.882
3811	Lenvatinib	12.29	5.45	182.522	13.76	7.71	408.975	15.31	8.38	537.568	14.88	8.28	510.074	15.85	8.54	577.983	16.38	9.39	722.129	0.414
3812	Lenvatinib	7.65	6.91	182.636	8.89	8.15	295.248	10.18	9.24	434.572	9.89	9.47	443.472	10.46	10.12	535.627	11.37	10.84	668.019	0.316
3854	Lenvatinib	7.9	6.84	184.803	9.62	8.15	319.492	9.66	9.16	405.264	10.09	8.84	394.245	10.18	9.08	419.652	11.62	10.42	630.829	0.327
3864	Lenvatinib	7.55	7.26	198.971	9.21	9.16	386.385	9.61	7.27	253.958	10.82	8.81	419.903	9.34	9.12	388.424	10.58	9.84	512.207	0.255
2463	Lenvatinib	8.19	6.9	194.963	9	6.81	208.692	7.65	7.01	187.961	9.91	7.95	313.168	9.5	7.89	295.697	14.59	8.59	538.284	0.233
2451	Palbociclib	9.12	5.95	161.435	10.97	6.77	251.393	12.17	7.21	316.323	12.45	7.58	357.666	13.79	8.7	521.883	14.21	9.26	609.237	0.449
2452	Palbociclib	9.13	5.31	128.715	10.72	6.01	193.604	10.69	7.26	281.722	12.18	8.52	442.076	12.71	8.73	484.333	14.48	8.92	576.061	0.608
2453	Palbociclib	7.52	5.58	117.073	7.78	6.26	152.44	8.57	6.7	192.354	9.65	8.06	313.449	10.46	8.61	387.711	11.38	9.31	493.187	0.369
2464	Palbociclib	6.91	5.44	102.246	8.75	6.97	212.541	8.77	8.3	302.083	10.22	8.84	399.324	10.44	9.66	487.107	11.19	9.79	536.248	0.413
2472	Palbociclib	6.51	6.23	126.336	6.9	6.78	158.591	8.33	8.23	282.108	9.76	8.35	340.246	9.7	8.95	388.497	10.81	9.56	493.982	0.413
3814	Palbo+Lenva	10.53	7.32	282.111	11.46	7.16	293.752	10.58	7.45	293.608	10.46	7.79	317.378	11.91	7.71	353.99	11.94	7.56	341.207	0.218
3822	Palbo+Lenva	7.76	7.33	208.468	8.45	7.62	245.322	8.39	7.41	230.339	8.57	8.39	301.63	8.32	7.38	226.572	8.37	7.46	232.902	0.18
3834	Palbo+Lenva	6.4	6.04	116.741	7.44	6.02	134.814	6.17	5.51	93.6609	6.47	6.24	125.963	6.31	6.07	116.246	6.46	6.08	119.401	0.072
3862	Palbo+Lenva	8.14	5.96	144.573	8.25	6.89	195.822	7.78	6.56	167.401	9.26	7.55	263.922	8.59	7.03	212.263	8.84	6.62	193.704	0.148
2474	Palbo+Lenva	9.8	7.39	267.599	9.16	6.59	198.901	9.26	6.67	205.984	9.61	7.18	247.709	9.1	7.16	233.258	9.22	7.56	263.478	0.178
