# Supplementary material for: A Patient-Derived Xenograft Model of Dedifferentiated Endometrial Carcinoma: A Proof-of-Concept Study for the Identification of New Molecularly Informed Treatment Approaches
Source: Cancers (Basel). 2021 Nov 26;13(23):5962. doi: 10.3390/cancers13235962 (PMC8656552; doi:10.3390/cancers13235962)
Supplement: Supplementary file 1 [file cancers-13-05962-s001.zip › TableS3_RNAseq.design.reads.summary-S2-09282021.xlsx]

## Sheet: supp_RNAseq.design.reads.summar
Sample	Sample_ID	Drug.treatment	Reads mapped to human genome	Reads mapped to mouse genome	Ratio of human reads	Ratio of mouse reads	reads.aligned	total.alignments	secondary.alignments	non.unique.alignments	exonic	intronic	intergenic	overlapping.exon
PDX-mLung (PDX tumor)	MQ201218-001	Control	42084373	647702	0.984843	0.0151573	151208466	173785660	22577194	18265524	70.11	26.51	3.38	9.14
PDX-mLung (PDX tumor)	MQ201218-002	Palbociclib	31605583	1052000	0.967787	0.032213	137974948	158939826	20964878	17226528	64.72	31.25	4.04	8.89
PDX-mLung (PDX tumor)	MQ210720_001	Palbociclib	22006739	993977	0.956785	0.043215	119889440	215483466	95594026	59818462	75.55	21.13	3.32	8.94
PDX-mLung (PDX tumor)	MQ210720_002	Lenvatinib	49451442	1254640	0.975257	0.0247434	159073592	206653332	47579740	32812160	73.44	23.88	2.69	8.6
PDX-mLung (PDX tumor)	MQ210720_003	Lenvatinib	43659542	1745713	0.961553	0.0384474	137015872	156945170	19929298	15731872	74.79	22.64	2.57	8.7
PDX-mLung (PDX tumor)	MQ210720_004	Palbociclib+Lenvatinib	45485721	1134674	0.975661	0.0243386	144408206	177750544	33342338	23899886	74.18	23.33	2.49	8.53
PDX-mLung (PDX tumor)	MQ210720_005	Palbociclib+Lenvatinib	40974503	486955	0.988255	0.0117448	139214114	164117384	24903270	18938338	71.75	25.4	2.85	8.77
PDX-mLung (PDX tumor)	MQ210826_001	Control	32866057	656478	0.980417	0.0195832	116934508	136820084	19885576	15138580	71.51	25.75	2.74	9.82
PDX-mLung (PDX tumor)	MQ210826_002	Control	33932748	592384	0.982842	0.0171581	115358202	133679840	18321638	14318358	71.24	26.11	2.65	9.45
PDX-mLung (PDX tumor)	MQ210826_003	Control	38094773	835882	0.978529	0.021471	137180844	158562206	21381362	16581996	70.53	26.61	2.86	9.18
PDX-mLung (PDX tumor)	MQ210826_004	Control	30775359	5063797	0.858708	0.141292	122813270	142274638	19461368	15405074	73.8	23.58	2.62	9.29
