# Supplementary material for: A Patient-Derived Xenograft Model of Dedifferentiated Endometrial Carcinoma: A Proof-of-Concept Study for the Identification of New Molecularly Informed Treatment Approaches
Source: Cancers (Basel). 2021 Nov 26;13(23):5962. doi: 10.3390/cancers13235962 (PMC8656552; doi:10.3390/cancers13235962)
Supplement: Supplementary file 1 [file cancers-13-05962-s001.zip › TableS4_RNAseq.design.reads.summary-S3-09282021.xlsx]

## Sheet: supp_RNAseq.counts
PDX-mLung (PDX tumor)	Drug.treatment	Control	Palbociclib	Palbociclib	Lenvatinib	Lenvatinib	Palbociclib+Lenvatinib	Palbociclib+Lenvatinib	Control	Control	Control	Control
gene_id	gene	MQ201218-001	MQ201218-002	MQ210720_001	MQ210720_002	MQ210720_003	MQ210720_004	MQ210720_005	MQ210826_001	MQ210826_002	MQ210826_003	MQ210826_004
ENSG00000186092	OR4F5	0	0	0	0	0	0	0	0	0	0	0
ENSG00000279928	FO538757.2	5	4	0	5	0	0	2	3	0	3	2
ENSG00000279457	FO538757.1	1318	1081	549	816	764	749	946	1009	891	1157	763
ENSG00000278566	OR4F29	0	0	0	0	0	0	0	0	0	0	0
ENSG00000273547	OR4F16	0	0	0	0	0	0	0	0	0	0	0
ENSG00000187634	SAMD11	128	93	1020	464	360	272	283	187	128	375	110
ENSG00000188976	NOC2L	8096	6911	3207	7226	6845	7251	7053	6871	5640	7903	5743
ENSG00000187961	KLHL17	908	932	424	628	595	610	786	645	588	799	643
ENSG00000187583	PLEKHN1	510	619	61	395	425	479	605	518	456	653	403
ENSG00000187642	PERM1	149	209	56	81	81	59	146	109	95	117	112
ENSG00000188290	HES4	679	577	238	264	234	212	471	433	230	500	401
ENSG00000187608	ISG15	9325	9098	1660	2470	1775	1063	1625	6392	2593	6522	4086
ENSG00000188157	AGRN	11656	10525	5082	17215	17321	16001	14126	12227	11135	13965	10595
ENSG00000237330	RNF223	245	332	89	187	209	142	162	186	165	169	149
ENSG00000131591	C1orf159	1942	1795	1733	1354	1323	1227	1597	1361	1201	1747	1275
ENSG00000162571	TTLL10	324	464	189	312	308	305	402	249	308	285	187
ENSG00000186891	TNFRSF18	1321	1853	4	962	869	724	975	806	711	974	962
ENSG00000186827	TNFRSF4	4	0	2	1	3	2	1	2	2	4	2
ENSG00000078808	SDF4	6640	4638	8276	6306	5920	5662	5979	5939	5120	6537	5011
ENSG00000176022	B3GALT6	1658	1327	1322	1445	1469	1446	1422	1305	1206	1493	1213
ENSG00000184163	FAM132A	126	112	35	99	85	72	118	103	99	119	63
ENSG00000160087	UBE2J2	3031	2245	2209	2986	2824	2705	2633	2814	2356	2843	2329
ENSG00000162572	SCNN1D	263	201	111	123	187	115	166	195	181	201	134
ENSG00000131584	ACAP3	7679	7745	2364	5824	5337	4558	5392	6847	5163	7874	4852
ENSG00000169972	PUSL1	787	750	468	763	704	726	772	822	689	875	575
ENSG00000127054	CPSF3L	6944	5848	3800	6058	5578	5696	6041	6215	5432	6588	4767
ENSG00000224051	CPTP	1609	1381	4028	1558	1418	1293	1360	1471	1092	1625	1172
ENSG00000169962	TAS1R3	59	44	48	103	82	81	46	78	58	74	40
ENSG00000107404	DVL1	6713	6286	3801	6502	6004	6205	6730	5845	5404	6257	4977
ENSG00000162576	MXRA8	11861	6472	103	5157	5133	6373	6543	14138	8308	9178	6761
ENSG00000175756	AURKAIP1	5074	4114	6066	2904	2582	2488	3244	3577	2592	3886	2950
ENSG00000221978	CCNL2	23569	20588	4224	13243	12678	13197	18337	16407	15657	18580	12217
ENSG00000242485	MRPL20	3781	3010	2379	2423	2302	2208	2511	3116	2364	3264	2458
ENSG00000235098	ANKRD65	97	72	41	90	85	85	91	104	102	158	53
ENSG00000205116	TMEM88B	22	15	0	9	7	17	11	14	17	12	3
ENSG00000179403	VWA1	3384	3683	3146	4589	4015	3927	4569	3665	4339	4289	3300
ENSG00000215915	ATAD3C	691	1365	339	624	429	443	613	562	902	790	441
ENSG00000160072	ATAD3B	5057	4630	1310	3512	3187	3114	3576	4395	3558	5037	3635
ENSG00000197785	ATAD3A	3477	2699	1867	3548	3369	3312	3396	3037	2710	3495	2934
ENSG00000205090	TMEM240	94	165	115	76	73	127	116	101	91	111	71
ENSG00000160075	SSU72	9504	7367	6748	8531	7471	7084	7619	7282	6159	8358	6641
ENSG00000279244	AL645728.1	0	0	0	0	0	0	0	0	0	0	0
ENSG00000228594	FNDC10	142	120	226	351	264	219	157	83	82	120	68
ENSG00000197530	MIB2	2706	3108	2882	2553	2356	2429	2975	2485	2514	2361	1667
ENSG00000189409	MMP23B	36	34	16	53	58	29	21	38	25	29	28
ENSG00000248333	CDK11B	5057	5236	3677	2795	2480	2705	3473	3469	2805	3983	2934
ENSG00000189339	SLC35E2B	5716	3819	3099	5576	5345	5108	4323	5960	4979	5799	4203
ENSG00000008128	CDK11A	162	171	62	88	86	90	144	111	92	121	123
ENSG00000215790	SLC35E2	214	132	117	334	305	291	219	313	250	284	198
ENSG00000008130	NADK	4695	3153	1872	5046	4513	4736	4497	4871	3940	4827	3722
ENSG00000078369	GNB1	11785	7087	10533	20146	18295	18797	14115	11104	10998	12273	11172
ENSG00000169885	CALML6	101	104	1	25	42	38	42	73	55	80	47
ENSG00000178821	TMEM52	134	133	49	139	119	98	89	72	65	88	89
ENSG00000142609	CFAP74	11	27	216	17	22	15	27	38	22	36	11
ENSG00000187730	GABRD	0	3	0	4	6	3	2	5	3	2	1
ENSG00000067606	PRKCZ	704	612	1197	903	826	816	662	795	687	770	552
ENSG00000162585	FAAP20	1650	1335	2464	1312	1259	1237	1503	1352	1136	1415	1209
ENSG00000157933	SKI	3787	2619	2209	6439	6218	6277	5160	4424	4371	4334	3875
ENSG00000116151	MORN1	455	268	516	452	423	385	333	536	431	464	321
ENSG00000157916	RER1	5244	4123	2243	4638	4097	4412	4240	4896	4388	5350	3721
ENSG00000157911	PEX10	743	458	777	825	691	763	736	630	615	669	625
ENSG00000149527	PLCH2	46	12	25	201	178	138	102	88	63	116	46
ENSG00000157881	PANK4	624	370	330	698	577	616	601	591	499	611	437
ENSG00000197921	HES5	2	0	1	2	0	0	0	0	0	2	0
ENSG00000157873	TNFRSF14	11	9	24	24	24	20	28	10	13	14	12
ENSG00000157870	FAM213B	53	44	64	151	133	121	82	75	63	80	47
ENSG00000142606	MMEL1	22	7	12	11	12	4	17	17	13	17	10
ENSG00000215912	TTC34	5	5	4	3	0	2	0	4	0	1	0
ENSG00000169717	ACTRT2	0	0	0	0	0	0	0	0	0	0	0
ENSG00000142611	PRDM16	0	3	0	0	2	1	2	0	0	0	0
ENSG00000130762	ARHGEF16	36	48	1946	169	100	63	81	30	72	50	42
ENSG00000162591	MEGF6	35	26	176	47	59	19	23	37	29	43	20
ENSG00000158109	TPRG1L	1177	615	1516	1714	1585	1714	1512	1177	1116	1192	1053
ENSG00000116213	WRAP73	1185	924	743	1110	1144	1087	1166	1149	1017	1366	965
ENSG00000078900	TP73	42	59	278	93	82	70	51	109	62	133	53
ENSG00000162592	CCDC27	2	1	5	0	5	0	0	2	0	2	0
ENSG00000235169	SMIM1	16	9	195	15	16	13	11	16	9	11	14
ENSG00000130764	LRRC47	3016	1930	1164	3439	3205	3748	3427	2869	2537	2993	2566
ENSG00000116198	CEP104	1671	1259	1122	2649	2431	2533	1933	1768	1870	2086	1567
ENSG00000169598	DFFB	679	572	281	654	608	634	620	524	463	696	520
ENSG00000198912	C1orf174	1026	763	386	1096	1066	1110	1036	825	799	1035	721
ENSG00000196581	AJAP1	0	1	0	0	0	0	0	1	0	0	0
ENSG00000131697	NPHP4	704	490	405	909	772	696	565	873	783	932	629
ENSG00000069424	KCNAB2	37	23	26	87	63	63	54	52	45	75	45
ENSG00000116254	CHD5	2	4	2	6	3	2	8	7	7	7	2
ENSG00000116251	RPL22	30361	26204	3143	27911	25222	32181	33398	21417	23184	25874	22895
ENSG00000158286	RNF207	2008	1698	37	1729	1581	1315	1661	2038	1953	1900	1305
ENSG00000116237	ICMT	3286	2095	1396	5073	4410	4237	3222	3206	2971	3376	2850
ENSG00000173673	HES3	0	2	0	0	0	1	0	0	0	1	0
ENSG00000158292	GPR153	309	198	27	230	246	168	134	426	210	384	281
ENSG00000097021	ACOT7	982	616	1010	1012	839	642	631	723	468	865	708
ENSG00000069812	HES2	573	515	81	654	662	442	417	477	362	723	561
ENSG00000187017	ESPN	1346	1384	291	2244	2103	1158	1256	642	570	1043	1122
ENSG00000215788	TNFRSF25	2169	2012	253	1486	1425	1344	1772	2226	1664	2404	1552
ENSG00000171680	PLEKHG5	3281	2257	856	3894	3831	3590	3417	4672	3585	4431	2986
ENSG00000162408	NOL9	2337	1385	541	3186	2900	2723	2453	2629	2160	2704	2069
ENSG00000173662	TAS1R1	16	21	37	9	6	7	4	6	7	18	2
ENSG00000204859	ZBTB48	1706	1313	1677	1098	1061	1073	1171	1536	1171	1638	1087
ENSG00000162413	KLHL21	2372	1910	1213	4152	3586	3613	2795	2709	2862	2704	2130
ENSG00000116273	PHF13	1860	1301	801	2431	2056	1859	1667	1715	1694	1757	1484
ENSG00000041988	THAP3	790	597	1161	620	511	542	623	627	533	640	486
ENSG00000007923	DNAJC11	2900	1727	511	3405	3029	2904	2400	3117	2608	3467	2465
ENSG00000171735	CAMTA1	890	657	883	619	557	477	562	566	496	745	593
ENSG00000049245	VAMP3	1378	857	254	2200	1648	1980	1554	1302	1281	1396	1191
ENSG00000049246	PER3	22	4	65	24	31	14	11	10	19	12	9
ENSG00000049247	UTS2	0	0	0	2	0	0	0	0	1	0	0
ENSG00000049249	TNFRSF9	3	0	1	9	16	3	1	0	3	2	1
ENSG00000116288	PARK7	9625	7241	7477	6286	5555	5497	5657	7108	5203	7734	5688
ENSG00000116285	ERRFI1	14430	18123	192	27671	22127	32645	34378	6508	23414	13673	14234
ENSG00000162426	SLC45A1	20	25	13	50	33	43	44	25	37	34	32
ENSG00000142599	RERE	6593	5141	5946	11221	10411	10228	8335	6995	6878	7344	5542
ENSG00000074800	ENO1	70349	48160	28082	110230	94650	98871	89503	57064	75857	67853	66545
ENSG00000131686	CA6	29	28	0	27	16	22	37	44	58	69	42
ENSG00000197241	SLC2A7	2	0	0	0	0	0	0	0	0	3	0
ENSG00000142583	SLC2A5	97	56	3	63	64	40	41	83	56	86	37
ENSG00000180758	GPR157	4513	2899	0	5246	4629	5133	4638	4369	4342	4179	3977
ENSG00000049239	H6PD	5243	3644	2311	8011	7204	7557	6036	7071	6700	6106	4842
ENSG00000171621	SPSB1	928	619	9	965	722	1029	1111	1087	1125	946	785
ENSG00000171612	SLC25A33	1802	1347	532	1644	1532	1435	1432	1471	1022	1560	1253
ENSG00000188807	TMEM201	1253	948	1243	1427	1346	1201	1117	1170	998	1280	1027
ENSG00000171608	PIK3CD	87	52	8	102	90	101	53	53	95	67	47
ENSG00000171603	CLSTN1	8343	5595	9883	19263	17958	17450	12830	9106	9462	9889	9020
ENSG00000280113	AL357140.1	3	0	0	2	3	3	0	1	5	5	1
ENSG00000178585	CTNNBIP1	2926	1926	2038	3268	2809	3161	3027	2729	2488	2759	2259
ENSG00000162441	LZIC	1118	613	279	1901	1727	1731	1203	927	1077	1112	975
ENSG00000173614	NMNAT1	515	314	257	576	532	498	477	496	428	534	377
ENSG00000162444	RBP7	19	23	5	23	11	22	25	10	24	35	15
ENSG00000130939	UBE4B	3656	2408	806	5986	5588	5501	3919	4030	3726	4263	3430
ENSG00000054523	KIF1B	3905	2137	889	8751	7625	7570	4474	4020	4206	5185	3927
ENSG00000142657	PGD	7096	5291	11336	8826	8229	8761	7388	7388	6676	7787	6019
ENSG00000251503	APITD1-CORT	12	25	4	6	7	9	10	6	18	20	3
ENSG00000175279	APITD1	67	63	20	30	34	36	28	41	39	54	38
ENSG00000241563	CORT	21	23	25	15	20	19	13	13	23	28	10
ENSG00000160049	DFFA	5003	4160	1914	3750	3433	3883	4051	3386	3227	3976	3476
ENSG00000142655	PEX14	1256	900	2795	1148	942	992	1097	1100	982	1177	892
ENSG00000130940	CASZ1	3270	2350	7386	3596	3119	2400	1989	3958	2670	3549	2399
ENSG00000175262	C1orf127	77	32	291	102	83	45	53	120	47	97	50
ENSG00000120948	TARDBP	4901	3363	953	4660	3875	3948	3687	3667	3270	4519	3353
ENSG00000277726	RP4-635E18.9	0	0	0	0	0	0	0	0	0	0	0
ENSG00000009724	MASP2	1132	671	16	366	324	292	270	1254	738	797	450
ENSG00000116649	SRM	15265	9025	3929	5637	5408	5042	5418	15545	7823	10836	6651
ENSG00000171824	EXOSC10	4569	2672	820	4212	3828	3949	3488	4548	3660	4343	3059
ENSG00000198793	MTOR	6177	3314	1525	7488	7000	6268	4205	7535	5375	6905	5112
ENSG00000171819	ANGPTL7	222	51	10	134	63	53	28	614	168	786	405
ENSG00000120942	UBIAD1	1218	624	1550	1194	1148	1029	1010	1255	895	988	932
ENSG00000204624	DISP3	33	31	8	196	150	68	66	44	42	204	54
ENSG00000116661	FBXO2	298	172	7	177	120	87	97	209	144	297	174
ENSG00000132879	FBXO44	1382	1099	213	934	780	744	955	1241	963	1369	834
ENSG00000116663	FBXO6	703	478	82	365	311	280	342	550	427	506	353
ENSG00000116670	MAD2L2	1117	774	1635	832	712	752	775	855	710	903	800
ENSG00000162490	DRAXIN	50	16	10	136	84	63	33	58	42	117	68
ENSG00000177674	AGTRAP	1239	856	983	1062	933	827	981	1073	998	1191	896
ENSG00000215910	C1orf167	1	0	2	2	3	0	0	2	3	3	0
ENSG00000177000	MTHFR	1524	972	1452	2333	1955	1731	1414	1778	1636	1968	1329
ENSG00000011021	CLCN6	1464	1014	576	1437	1339	1331	1384	1243	1318	1546	1011
ENSG00000175206	NPPA	17	12	6	18	18	15	27	17	13	31	10
ENSG00000120937	NPPB	0	0	0	0	1	0	1	0	1	0	0
ENSG00000116685	KIAA2013	4616	3613	4283	5105	4433	4481	4792	3592	3709	4181	3794
ENSG00000083444	PLOD1	9147	8906	9498	11106	9705	10578	9877	6273	7270	7575	7292
ENSG00000116688	MFN2	5335	3322	2692	6336	5848	5639	4392	4895	4291	5192	4319
ENSG00000116691	MIIP	1318	1172	1434	855	785	816	929	1033	784	1217	857
ENSG00000120949	TNFRSF8	6	3	0	3	2	0	4	2	0	10	2
ENSG00000028137	TNFRSF1B	2	1	0	1	3	2	0	3	1	7	1
ENSG00000048707	VPS13D	2697	1689	801	6052	5282	5513	3139	3705	3830	3612	2401
ENSG00000162496	DHRS3	1312	1623	1829	1578	1268	1732	2096	1778	2289	1356	1179
ENSG00000204518	AADACL4	0	0	1	0	0	0	0	0	0	0	0
ENSG00000188984	AADACL3	8	5	0	11	9	17	9	2	5	13	4
ENSG00000157330	C1orf158	9	2	127	6	7	6	14	12	5	5	4
ENSG00000116726	PRAMEF12	24	11	0	8	6	5	5	26	13	17	10
ENSG00000116721	PRAMEF1	17	6	0	8	8	0	11	10	12	9	2
ENSG00000239810	PRAMEF11	0	0	0	1	1	0	1	4	1	1	1
ENSG00000179172	HNRNPCL1	21	11	9	15	3	15	9	15	3	7	8
ENSG00000120952	PRAMEF2	23	8	0	11	9	16	3	16	6	18	4
ENSG00000243073	PRAMEF4	13	1	0	0	2	4	2	5	5	2	0
ENSG00000187545	PRAMEF10	2	0	0	1	1	1	1	5	0	1	1
ENSG00000204510	PRAMEF7	1	1	0	2	1	0	0	1	2	1	0
ENSG00000232423	PRAMEF6	10	2	0	0	1	1	1	6	2	2	0
ENSG00000274764	PRAMEF27	0	0	0	0	0	0	0	1	0	1	0
ENSG00000229571	PRAMEF25	0	0	0	0	0	0	0	0	0	2	0
ENSG00000277058	HNRNPCL3	0	0	0	0	0	0	1	0	0	0	0
ENSG00000275774	HNRNPCL2	3	0	0	0	3	2	0	3	2	0	2
ENSG00000280267	PRAMEF26	0	0	0	0	0	0	0	0	0	0	0
ENSG00000179412	HNRNPCL4	0	0	0	0	0	0	0	0	0	0	0
ENSG00000204505	PRAMEF9	4	0	0	1	2	5	3	4	1	0	1
ENSG00000279804	PRAMEF18	0	0	0	0	0	0	0	0	0	0	0
ENSG00000270601	PRAMEF5	0	0	0	0	0	1	1	1	0	0	0
ENSG00000182330	PRAMEF8	3	0	0	0	1	2	0	0	1	1	1
ENSG00000204501	PRAMEF15	8	1	0	1	3	5	0	10	1	0	3
ENSG00000204481	PRAMEF14	3	0	0	0	2	2	3	2	3	2	1
ENSG00000204480	PRAMEF19	0	2	0	0	0	0	0	0	1	0	0
ENSG00000204479	PRAMEF17	0	0	0	0	0	0	0	0	0	0	0
ENSG00000204478	PRAMEF20	1	0	0	1	1	1	2	1	0	3	3
ENSG00000162494	LRRC38	0	0	0	1	0	0	0	1	0	0	0
ENSG00000162493	PDPN	0	1	0	0	2	0	0	0	1	1	1
ENSG00000116731	PRDM2	2198	1564	667	3725	3502	3366	2587	2012	2255	2394	1797
ENSG00000189337	KAZN	960	514	5	1897	1456	1084	983	1340	1323	1186	741
ENSG00000171729	TMEM51	540	380	138	605	567	493	487	395	470	589	500
ENSG00000142621	FHAD1	75	49	80	69	42	72	56	53	64	56	41
ENSG00000142634	EFHD2	2486	2608	1095	2777	2660	2792	3485	1716	2504	2370	2298
ENSG00000162438	CTRC	12	23	0	18	17	19	21	6	28	7	11
ENSG00000142615	CELA2A	0	0	5	3	4	3	3	1	1	4	4
ENSG00000215704	CELA2B	6	7	22	9	7	8	14	7	10	8	2
ENSG00000132906	CASP9	373	290	1509	332	343	336	286	301	275	329	246
ENSG00000116138	DNAJC16	1466	853	557	2082	1820	2064	1687	1633	1541	1657	1321
ENSG00000116771	AGMAT	18	14	92	24	20	17	25	21	14	28	12
ENSG00000197312	DDI2	4441	2945	606	6725	5767	5942	4253	3604	4160	4549	3466
ENSG00000215695	RSC1A1	0	0	0	0	0	0	0	0	0	0	0
ENSG00000116786	PLEKHM2	3140	2191	3410	4051	3474	3119	2804	3142	2817	3290	2318
ENSG00000162461	SLC25A34	137	75	184	84	37	46	58	115	58	128	48
ENSG00000162460	TMEM82	3	1	10	1	1	1	2	0	0	2	0
ENSG00000162458	FBLIM1	4055	3408	4791	3713	3384	3899	4595	3767	3611	4647	3262
ENSG00000233954	UQCRHL	685	532	145	418	298	322	441	403	393	365	388
ENSG00000065526	SPEN	6308	5070	1434	12939	11740	11879	7819	5275	7382	7566	5158
ENSG00000116809	ZBTB17	1813	1420	2625	1456	1332	1220	1405	1776	1464	1785	1214
ENSG00000183888	C1orf64	1	1	38	0	0	0	0	2	0	0	0
ENSG00000173641	HSPB7	112	55	0	167	160	213	167	143	120	138	84
ENSG00000186510	CLCNKA	368	299	0	224	233	252	350	263	242	257	190
ENSG00000184908	CLCNKB	37	21	2	25	23	20	30	18	18	19	19
ENSG00000185519	FAM131C	435	306	7	456	392	393	435	363	315	412	317
ENSG00000142627	EPHA2	1474	2210	269	2632	2401	1957	2067	1200	2034	1839	1584
ENSG00000142632	ARHGEF19	3716	2579	955	3573	3534	3735	2969	4254	3458	4235	3190
ENSG00000132881	RSG1	69	44	129	120	142	135	93	123	81	131	82
ENSG00000037637	FBXO42	2399	1841	898	2915	2900	2712	2307	2362	2236	2458	1924
ENSG00000055070	SZRD1	4368	3211	3943	5117	4584	4711	4283	4160	3567	4168	3380
ENSG00000187144	SPATA21	3	6	11	4	7	9	5	3	8	5	3
ENSG00000157191	NECAP2	1885	1143	1210	2349	2038	2128	1974	1586	1769	1730	1489
ENSG00000268991	FAM231B	0	0	0	0	0	0	0	0	0	0	0
ENSG00000219481	NBPF1	1203	634	1124	2380	2198	2346	1235	1552	1374	1693	1127
ENSG00000237847	FAM231A	0	0	0	0	0	0	0	0	0	0	0
ENSG00000279132	FAM231C	0	0	1	0	0	0	0	0	0	0	0
ENSG00000058453	CROCC	1764	1512	1571	1276	1236	1178	1536	1685	1266	1721	1198
ENSG00000117122	MFAP2	7733	5214	2717	5482	5013	6126	6664	8656	6526	7102	5768
ENSG00000159363	ATP13A2	5013	3859	4876	5032	4606	5146	4784	4948	3979	5269	4294
ENSG00000117118	SDHB	3380	1994	640	3518	3063	3086	2877	2677	2394	3073	2612
ENSG00000117115	PADI2	6705	3492	10	6450	6717	8042	8222	6394	4839	4312	3969
ENSG00000142623	PADI1	62	70	0	128	74	61	81	16	65	50	35
ENSG00000142619	PADI3	30	13	0	61	33	8	29	59	22	43	21
ENSG00000159339	PADI4	1	0	0	0	0	1	0	2	1	0	0
ENSG00000280226	AC004824.1	0	0	0	0	0	0	0	0	0	0	0
ENSG00000276747	PADI6	2	1	0	4	0	4	2	2	0	1	0
ENSG00000179051	RCC2	14516	9265	3587	17432	16307	15215	12789	15283	12191	15243	12142
ENSG00000074964	ARHGEF10L	2090	1365	1963	2618	2128	1627	1801	2208	2054	2510	1607
ENSG00000117148	ACTL8	31	16	0	32	21	16	13	40	15	54	28
ENSG00000117154	IGSF21	2	3	0	10	5	10	8	2	1	3	1
ENSG00000179023	KLHDC7A	27	14	209	22	26	32	15	25	33	17	9
ENSG00000009709	PAX7	42	5	1	113	215	206	138	188	94	39	31
ENSG00000179002	TAS1R2	0	0	0	0	0	0	1	0	0	0	0
ENSG00000255275	RP13-279N23.2	0	0	4	0	2	4	0	0	2	4	2
ENSG00000159423	ALDH4A1	695	398	966	424	471	402	398	549	370	449	399
ENSG00000169991	IFFO2	1584	1152	63	1653	1574	1536	1247	1808	1863	1593	1280
ENSG00000127481	UBR4	9056	6705	3650	19369	17419	17550	11841	13086	12015	13613	9795
ENSG00000127463	EMC1	3121	1929	1324	4281	3898	4266	2928	3553	3050	3661	2932
ENSG00000053372	MRTO4	5524	4032	2969	3775	3531	3512	3871	3777	3255	4488	3757
ENSG00000162482	AKR7A3	387	312	1579	242	250	256	306	350	257	377	225
ENSG00000053371	AKR7A2	1136	605	1615	1403	1296	1055	933	1041	951	1157	859
ENSG00000040487	PQLC2	808	569	920	629	603	523	591	732	606	788	554
ENSG00000077549	CAPZB	10590	7100	10473	8826	8174	7742	8347	8286	7327	9356	7050
ENSG00000173436	MINOS1	401	324	93	325	279	335	365	297	310	440	276
ENSG00000270136	MINOS1-NBL1	0	0	0	1	2	2	0	0	0	1	1
ENSG00000158747	NBL1	1487	771	431	828	716	624	777	994	748	1221	784
ENSG00000158748	HTR6	6	2	0	16	3	4	12	8	8	13	4
ENSG00000162542	TMCO4	1994	1205	780	2317	1873	1227	1182	1998	1556	1879	1295
ENSG00000178828	RNF186	1	1	2	9	5	6	5	1	1	6	0
ENSG00000169914	OTUD3	1834	866	286	2764	2303	2058	1696	1726	1982	2200	1722
ENSG00000188784	PLA2G2E	2	0	0	1	0	0	0	1	2	1	0
ENSG00000188257	PLA2G2A	1	6	0	0	0	0	0	0	0	0	6
ENSG00000127472	PLA2G5	0	0	0	1	0	0	0	0	0	0	1
ENSG00000117215	PLA2G2D	0	0	1	0	0	0	0	0	0	0	0
ENSG00000158786	PLA2G2F	4	4	3	5	1	1	3	2	0	7	1
ENSG00000187980	PLA2G2C	0	0	14	0	0	0	0	0	0	0	0
ENSG00000162543	UBXN10	10	10	846	20	15	9	21	15	15	11	3
ENSG00000158816	VWA5B1	1	2	0	13	8	4	1	4	4	9	2
ENSG00000162545	CAMK2N1	383	100	844	352	235	92	112	205	166	322	214
ENSG00000090432	MUL1	677	295	724	1039	938	857	592	671	645	650	615
ENSG00000183114	FAM43B	2	0	0	0	0	0	1	2	1	5	0
ENSG00000158825	CDA	79	123	20	212	110	90	128	40	78	102	105
ENSG00000158828	PINK1	275	143	305	613	471	428	357	326	331	326	284
ENSG00000244038	DDOST	7267	4781	6364	8773	7664	8871	7834	6511	6235	6988	6214
ENSG00000117245	KIF17	25	29	6	31	32	19	18	28	22	44	29
ENSG00000189410	SH2D5	75	43	2	103	74	68	44	41	47	111	68
ENSG00000127483	HP1BP3	9180	4760	2741	11395	10354	9432	7956	6685	7251	8402	6594
ENSG00000075151	EIF4G3	4583	3487	842	6340	5543	5312	4670	1817	3123	3417	2339
ENSG00000117298	ECE1	7816	5149	3725	15270	13696	9850	8117	7956	7031	8304	7459
ENSG00000142794	NBPF3	786	344	106	1142	1075	1143	873	882	948	926	746
ENSG00000162551	ALPL	2599	2301	201	2496	2943	2345	2385	1728	1806	3181	2678
ENSG00000076864	RAP1GAP	2248	1222	24871	2796	2399	3161	3245	2132	1979	1626	1496
ENSG00000090686	USP48	3792	2892	1084	4302	3857	4260	3823	2156	2894	3064	2288
ENSG00000187942	LDLRAD2	31	10	28	17	19	13	13	28	20	45	24
ENSG00000142798	HSPG2	2687	2055	2535	9133	9298	8254	3357	6320	4510	5499	3928
ENSG00000219073	CELA3B	0	0	43	0	0	0	0	0	2	0	0
ENSG00000142789	CELA3A	0	0	41	0	0	0	0	0	0	0	0
ENSG00000070831	CDC42	8431	4825	3308	11877	10099	10068	8557	6914	6788	7878	7213
ENSG00000162552	WNT4	185	58	291	97	51	66	48	257	122	196	72
ENSG00000184677	ZBTB40	4390	3122	1316	4204	3841	4218	4033	4149	4046	4780	3277
ENSG00000070886	EPHA8	47	21	44	45	32	49	57	67	45	54	29
ENSG00000173372	C1QA	0	0	0	1	1	0	0	2	0	2	0
ENSG00000159189	C1QC	0	0	0	0	0	0	0	0	0	0	0
ENSG00000173369	C1QB	0	0	0	0	0	0	0	0	0	0	0
ENSG00000133216	EPHB2	561	211	8	1347	1081	966	770	783	660	1152	590
ENSG00000215906	LACTBL1	0	0	0	0	1	1	0	0	0	1	0
ENSG00000227868	C1orf234	1	3	8	5	2	1	1	4	3	4	2
ENSG00000004487	KDM1A	10966	7248	4937	12385	11424	11731	9576	9812	8971	10888	8840
ENSG00000169641	LUZP1	1171	728	802	2542	2367	1973	1187	1260	1182	1418	1157
ENSG00000179546	HTR1D	0	1	3	6	1	0	1	0	2	0	2
ENSG00000125944	HNRNPR	8091	4937	2595	13087	11943	11944	8150	5591	6747	7783	6886
ENSG00000125945	ZNF436	4257	2569	423	3898	3619	3494	2900	4223	3947	3955	2808
ENSG00000204219	TCEA3	2796	1866	1380	2387	2014	1903	1939	2764	2459	2500	1560
ENSG00000088280	ASAP3	5775	3923	200	4421	3833	3515	3376	5902	4189	5022	3492
ENSG00000007968	E2F2	1956	1370	70	1813	1921	1371	1018	1800	1295	2006	1663
ENSG00000117318	ID3	5138	4040	1659	4587	4239	2344	2340	4019	2336	4301	3121
ENSG00000197880	MDS2	16	8	2	9	11	5	7	13	10	13	11
ENSG00000142676	RPL11	66123	56903	11259	51844	46378	61036	70224	47573	51257	55137	48137
ENSG00000011007	TCEB3	2751	2029	603	4207	3908	3831	3091	2739	2592	3041	2434
ENSG00000057757	PITHD1	3956	2404	971	3656	3314	3265	3402	3092	2588	3405	2598
ENSG00000011009	LYPLA2	3830	2807	5548	3897	3483	3586	4224	3378	2950	3817	3000
ENSG00000117308	GALE	2392	2355	2905	2558	2159	1708	2016	1865	1977	1996	1455
ENSG00000117305	HMGCL	1500	1024	1923	1614	1453	1331	1312	1409	1311	1397	1191
ENSG00000179163	FUCA1	497	315	1163	707	554	535	510	524	466	586	437
ENSG00000188822	CNR2	0	0	2	0	0	0	0	1	0	2	1
ENSG00000189266	PNRC2	4275	3107	1153	5552	4816	5162	4404	2349	2885	3505	2793
ENSG00000188529	SRSF10	6247	4279	1242	8426	7116	7271	6333	3359	4918	5390	4199
ENSG00000142661	MYOM3	10	4	2	8	7	9	3	8	28	12	13
ENSG00000142677	IL22RA1	34	25	3	46	41	16	5	37	26	52	39
ENSG00000185436	IFNLR1	1166	667	284	1052	1065	807	718	952	840	1036	769
ENSG00000158055	GRHL3	3017	3633	14	5600	4474	3965	3971	2999	4919	3676	3287
ENSG00000001460	STPG1	600	392	1093	536	524	486	497	554	407	513	361
ENSG00000001461	NIPAL3	2221	1636	2082	2560	2290	2365	2122	2002	1878	2336	1688
ENSG00000117602	RCAN3	1438	880	735	2194	1953	2180	1767	1094	1324	1454	1280
ENSG00000184454	NCMAP	67	47	297	140	131	162	168	42	95	69	89
ENSG00000133226	SRRM1	15764	13999	8486	14347	12949	14501	15575	9113	10838	11445	9062
ENSG00000169504	CLIC4	5048	2549	117	16486	13558	13130	7175	3870	5693	5097	4847
ENSG00000020633	RUNX3	1294	1367	2	935	808	1248	1195	1055	1309	1078	1206
ENSG00000117614	SYF2	3476	3209	2490	2819	2361	3068	3617	1774	2174	2520	2113
ENSG00000117616	RSRP1	4092	3600	321	3204	2971	3529	4052	2311	2753	3175	1867
ENSG00000187010	RHD	114	103	69	67	80	92	122	74	98	72	51
ENSG00000183726	TMEM50A	3330	2466	2119	3350	2817	3040	3080	2382	2529	3042	2455
ENSG00000188672	RHCE	33	25	118	36	34	55	49	30	40	28	18
ENSG00000204178	TMEM57	1704	1296	902	2238	1882	2055	2036	1232	1406	1647	1178
ENSG00000157978	LDLRAP1	875	734	602	1074	1003	916	885	950	744	957	703
ENSG00000117643	MAN1C1	27	14	454	40	32	25	28	38	26	40	28
ENSG00000162430	SEPN1	2694	1769	10791	3837	3702	3984	2931	3537	2978	3065	2559
ENSG00000255054	RP1-317E23.6	0	0	0	0	0	0	0	0	0	0	0
ENSG00000117640	MTFR1L	2082	1389	2796	1441	1344	1193	1483	1749	1387	1646	1156
ENSG00000127423	AUNIP	572	477	355	635	529	530	479	496	346	582	433
ENSG00000182749	PAQR7	594	335	2516	458	407	319	275	680	403	554	430
ENSG00000117632	STMN1	15874	9109	10161	11368	10727	9449	8494	11615	8076	14356	10107
ENSG00000158006	PAFAH2	1356	1189	2710	1180	999	1021	986	1157	862	1165	900
ENSG00000158008	EXTL1	58	29	58	60	70	39	59	98	43	95	39
ENSG00000158014	SLC30A2	35	23	150	25	19	8	11	50	27	42	19
ENSG00000158022	TRIM63	19	9	1	12	14	8	10	14	14	7	9
ENSG00000175087	PDIK1L	584	251	26	1156	985	959	626	200	412	456	385
ENSG00000197245	FAM110D	76	31	8	102	68	36	41	54	39	65	57
ENSG00000282872	RP11-96L14.8	1	7	2	6	2	2	0	5	3	8	1
ENSG00000236782	RP11-96L14.7	7	6	9	21	23	8	12	8	8	16	7
ENSG00000142684	ZNF593	5	0	0	1	0	0	0	2	0	3	1
ENSG00000142675	CNKSR1	2722	2191	2537	1795	1781	1847	2213	2223	1931	2396	1659
ENSG00000188782	CATSPER4	6	4	2	2	4	2	2	6	3	4	3
ENSG00000130695	CEP85	1492	847	394	1594	1403	1330	1019	1683	1257	1610	1227
ENSG00000142669	SH3BGRL3	4807	3377	13127	3253	2812	2093	2567	3895	2842	4100	2490
ENSG00000158062	UBXN11	2036	1613	1932	1228	1069	1113	1466	1718	1261	1687	1164
ENSG00000169442	CD52	1	0	0	1	2	0	0	2	1	1	0
ENSG00000176092	AIM1L	556	434	52	631	532	303	379	583	551	750	539
ENSG00000176083	ZNF683	0	1	0	1	0	0	0	0	0	0	0
ENSG00000131914	LIN28A	7	4	6	4	0	4	2	4	4	5	1
ENSG00000117682	DHDDS	2211	1612	1792	2128	1969	2138	2155	2203	1776	2271	1566
ENSG00000198830	HMGN2	16798	10001	6722	12932	13083	13872	12825	13676	10485	13612	11990
ENSG00000117676	RPS6KA1	6380	4305	8711	6941	6098	5710	5206	5519	4615	5607	4278
ENSG00000117713	ARID1A	9349	6657	8425	11562	10815	10344	8115	9920	8404	10262	7576
ENSG00000060642	PIGV	618	388	579	592	527	572	485	560	489	484	384
ENSG00000204160	ZDHHC18	3145	2341	1340	3117	2914	2880	2787	2811	2615	3095	2452
ENSG00000175793	SFN	10461	8221	471	8589	7732	5038	6040	7937	7367	9775	7448
ENSG00000142751	GPN2	1650	1056	883	1888	1695	1654	1639	1671	1490	1863	1413
ENSG00000198746	GPATCH3	756	553	765	782	579	627	621	617	532	669	531
ENSG00000090273	NUDC	6891	5053	5628	5500	5012	5264	5435	5534	4873	6199	4543
ENSG00000131910	NR0B2	2	0	12	1	0	1	2	0	0	1	0
ENSG00000175707	KDF1	1080	723	1193	1055	969	981	896	833	818	968	660
ENSG00000253368	TRNP1	295	183	743	295	204	290	257	203	189	284	190
ENSG00000158246	FAM46B	965	862	64	551	653	708	599	912	592	744	545
ENSG00000280403	AL137860.1	318	199	3	191	164	170	192	172	171	257	195
ENSG00000090020	SLC9A1	2962	2109	1852	3168	2888	2363	2131	3246	2515	2791	1984
ENSG00000142784	WDTC1	1973	1283	3192	2351	2031	1924	1736	2070	1640	1884	1314
ENSG00000186501	TMEM222	1925	1195	4060	1741	1524	1510	1597	1786	1576	1911	1428
ENSG00000142765	SYTL1	5482	4708	6538	3349	3071	2873	3635	5660	3694	5127	2942
ENSG00000142733	MAP3K6	1890	1663	553	1791	1434	1354	1556	2145	1968	1888	1364
ENSG00000142748	FCN3	15	6	0	10	6	8	9	12	10	14	5
ENSG00000174950	CD164L2	181	154	116	149	129	107	79	143	93	169	105
ENSG00000181773	GPR3	34	87	15	51	36	38	39	33	16	33	36
ENSG00000158195	WASF2	8679	5901	9173	13579	12039	12887	9966	9094	8980	9079	7254
ENSG00000126705	AHDC1	5625	3827	2700	5241	5054	4669	4180	6458	4447	6378	3673
ENSG00000000938	FGR	19	23	0	16	8	3	7	20	18	31	20
ENSG00000126709	IFI6	18633	14246	79	7551	5435	3728	4896	15898	8826	15470	10230
ENSG00000009780	FAM76A	748	449	131	598	501	539	474	711	606	749	546
ENSG00000117758	STX12	2264	1486	422	3108	2625	2686	2337	1803	1915	2259	1937
ENSG00000117751	PPP1R8	2110	1313	584	2716	2428	2618	2135	1986	1875	2235	1922
ENSG00000278868	AL109927.1	0	0	0	0	0	0	0	0	0	0	0
ENSG00000130775	THEMIS2	1016	632	27	721	669	791	910	872	760	1026	821
ENSG00000117748	RPA2	1595	1044	1221	1509	1473	1593	1339	1471	1261	1485	1117
ENSG00000130768	SMPDL3B	242	149	688	388	365	501	396	279	303	326	280
ENSG00000158156	XKR8	177	233	760	80	134	176	196	162	119	220	111
ENSG00000158161	EYA3	1452	989	491	1822	1697	1667	1375	1259	1272	1474	1073
ENSG00000169403	PTAFR	160	126	37	162	128	90	94	80	109	104	108
ENSG00000126698	DNAJC8	5152	3592	2490	4228	3711	3695	3569	3890	3380	4386	3322
ENSG00000130770	ATPIF1	6216	5211	9971	3578	3227	3236	3881	4900	3257	5204	3503
ENSG00000130766	SESN2	1775	1648	2220	2690	2264	2401	1947	2057	1573	2096	1488
ENSG00000130772	MED18	612	449	1132	651	581	659	680	475	459	558	480
ENSG00000204138	PHACTR4	6697	4397	2689	6341	5819	5897	5491	5797	5026	5942	4889
ENSG00000180198	RCC1	6766	5154	1309	6172	5628	5438	5428	5173	4461	5655	4836
ENSG00000180098	TRNAU1AP	2279	1865	877	1628	1497	1449	1815	1721	1483	1932	1498
ENSG00000120656	TAF12	1179	1087	564	890	783	838	947	805	640	884	723
ENSG00000188060	RAB42	63	67	16	49	63	43	54	54	36	69	48
ENSG00000162419	GMEB1	1740	1232	655	1702	1452	1382	1299	1373	1357	1484	1230
ENSG00000198492	YTHDF2	5856	4570	1615	7659	6720	6654	5704	4876	5010	5678	4695
ENSG00000116329	OPRD1	32	30	2	26	25	12	21	21	14	29	22
ENSG00000159023	EPB41	2570	1012	186	5365	4635	4198	2688	2381	2255	3301	2251
ENSG00000253304	TMEM200B	47	2	0	15	8	10	10	58	34	16	12
ENSG00000116350	SRSF4	9781	7390	1849	7369	6567	6182	6956	5993	6480	7871	5648
ENSG00000116353	MECR	1872	1237	713	1428	1470	1445	1462	1592	1414	1800	1441
ENSG00000060656	PTPRU	3110	2414	395	4425	3952	4670	4182	3255	3334	3449	3038
ENSG00000162510	MATN1	69	36	65	37	18	20	24	88	45	78	22
ENSG00000162511	LAPTM5	11	9	4	18	15	19	19	12	8	12	7
ENSG00000162512	SDC3	1503	946	5712	2586	2294	2482	2033	2103	1522	1933	1437
ENSG00000134644	PUM1	6147	4889	3920	11057	9502	10248	7345	5420	6377	6706	5350
ENSG00000084628	NKAIN1	39	21	57	52	46	40	20	70	49	86	33
ENSG00000060688	SNRNP40	2507	1437	953	2680	2459	2408	2073	2285	1890	2517	2200
ENSG00000121766	ZCCHC17	1783	1755	2860	915	791	802	963	1167	868	1317	935
ENSG00000121769	FABP3	879	373	41	536	427	345	369	714	415	1203	483
ENSG00000168528	SERINC2	9274	7048	6329	7840	6740	7647	9642	8176	7280	8053	6315
ENSG00000142910	TINAGL1	3204	2874	171	2248	2126	2665	3335	3087	2712	2735	2270
ENSG00000121764	HCRTR1	3	1	3	8	4	12	17	7	7	5	3
ENSG00000162517	PEF1	2028	1362	2574	1467	1283	1374	1448	1502	1263	1585	1274
ENSG00000084636	COL16A1	12937	8331	248	5043	4992	5351	5646	13142	8090	10671	6857
ENSG00000121753	ADGRB2	496	198	468	458	432	380	352	592	339	532	254
ENSG00000134668	SPOCD1	44	34	9	98	57	74	68	50	67	61	50
ENSG00000184007	PTP4A2	5344	4412	1452	8037	6843	7185	7057	3960	4608	4844	4315
ENSG00000121774	KHDRBS1	10831	6426	2309	16257	14392	14875	12071	8937	9223	10549	9249
ENSG00000121775	TMEM39B	691	583	518	601	628	582	500	624	492	648	503
ENSG00000025800	KPNA6	5694	4126	3800	5149	4567	4403	3968	4294	3706	4529	3793
ENSG00000084652	TXLNA	3878	2199	2876	5156	4648	4778	3673	4201	3481	4056	3078
ENSG00000160050	CCDC28B	447	231	452	469	400	293	256	347	257	390	251
ENSG00000160051	IQCC	269	138	129	217	187	224	200	239	169	250	205
ENSG00000222046	DCDC2B	35	33	37	59	47	36	40	63	49	59	27
ENSG00000160055	TMEM234	388	261	235	281	225	250	262	286	264	360	237
ENSG00000084623	EIF3I	12055	10207	7724	8170	7759	7766	8580	8728	7515	9782	8027
ENSG00000183615	FAM167B	52	42	63	12	21	17	21	51	33	32	14
ENSG00000182866	LCK	47	31	17	48	38	39	39	65	48	47	44
ENSG00000116478	HDAC1	6646	4480	6732	5913	5240	4613	4132	6260	4800	5802	4462
ENSG00000175130	MARCKSL1	21170	14109	79707	15121	14448	13545	13472	18307	14515	19060	15166
ENSG00000162526	TSSK3	28	15	7	47	35	43	28	51	43	50	23
ENSG00000225828	FAM229A	417	361	215	239	250	236	303	306	255	376	228
ENSG00000160058	BSDC1	2966	1655	2585	3577	3139	2905	2417	3337	2782	3157	2181
ENSG00000254553	RP1-27O5.3	3	4	3	1	0	2	0	4	1	1	0
ENSG00000273274	ZBTB8B	44	33	4	53	69	164	67	92	83	78	51
ENSG00000160062	ZBTB8A	642	487	325	493	431	488	427	400	375	510	367
ENSG00000176261	ZBTB8OS	1415	1075	368	955	925	785	757	942	815	1062	839
ENSG00000162521	RBBP4	10733	6665	2007	11644	10666	11067	8953	10324	8867	10107	8049
ENSG00000162520	SYNC	118	25	15	187	169	120	72	125	110	117	109
ENSG00000162522	KIAA1522	15293	9961	11087	20304	19405	19105	16393	16193	14521	15727	12468
ENSG00000134684	YARS	7984	6040	3050	8847	7531	7719	7708	7112	6152	7857	5876
ENSG00000116497	S100PBP	1760	987	350	1697	1378	1514	1371	1573	1443	1804	1220
ENSG00000160097	FNDC5	460	167	54	727	565	265	257	414	245	1275	336
ENSG00000121905	HPCA	102	52	10	190	144	54	74	92	60	242	71
ENSG00000121900	TMEM54	1158	811	1369	853	750	531	650	938	819	1033	690
ENSG00000116514	RNF19B	1109	893	156	2777	2291	2276	1941	1175	1626	1386	1440
ENSG00000004455	AK2	9899	6911	2462	10041	8448	9397	9161	8848	8529	9605	7377
ENSG00000142920	AZIN2	379	252	37	424	342	305	355	390	354	459	293
ENSG00000116525	TRIM62	1134	704	454	1371	1217	962	966	1022	792	1189	718
ENSG00000160094	ZNF362	2654	1580	3375	2327	2157	2067	1881	2483	1838	2626	1821
ENSG00000184389	A3GALT2	5	12	11	10	13	9	16	12	8	16	12
ENSG00000134686	PHC2	3417	2437	10218	4516	3965	3736	3370	3214	2914	3506	2737
ENSG00000121903	ZSCAN20	250	130	110	311	276	303	193	214	206	209	195
ENSG00000121904	CSMD2	2	0	0	3	2	0	2	3	1	4	1
ENSG00000176256	HMGB4	0	0	0	0	0	0	0	0	0	0	0
ENSG00000142698	C1orf94	0	0	0	0	0	0	0	0	0	0	0
ENSG00000163866	SMIM12	955	507	699	1270	1149	1077	919	922	838	1039	893
ENSG00000189280	GJB5	319	145	0	516	420	246	277	286	278	385	291
ENSG00000189433	GJB4	34	8	3	117	114	61	56	32	55	32	47
ENSG00000188910	GJB3	645	526	9	1810	1428	935	996	520	828	811	830
ENSG00000187513	GJA4	38	35	0	199	189	198	239	6	45	57	69
ENSG00000116544	DLGAP3	23	8	7	23	15	24	19	18	14	47	10
ENSG00000271741	RP11-244H3.4	0	0	0	0	0	0	0	0	0	0	0
ENSG00000243749	TMEM35B	0	0	0	0	0	0	0	0	1	0	0
ENSG00000163867	ZMYM6	628	412	97	592	495	519	563	146	280	292	243
ENSG00000197056	ZMYM1	631	303	37	1242	952	1116	804	134	342	272	231
ENSG00000116560	SFPQ	29428	19763	3802	33103	30717	30286	27120	21266	24463	30124	21524
ENSG00000146463	ZMYM4	3704	2103	241	5530	4989	5100	3653	1579	2652	3003	2066
ENSG00000142687	KIAA0319L	4733	2596	4576	4157	3782	3345	3041	4944	3327	4729	3195
ENSG00000020129	NCDN	4680	1440	2282	4210	3927	2317	1556	5004	2172	3838	2574
ENSG00000116819	TFAP2E	972	572	107	631	575	468	469	825	500	790	531
ENSG00000126067	PSMB2	5804	4060	3732	6402	5687	5640	5371	5011	4316	5998	4897
ENSG00000142686	C1orf216	640	302	411	690	644	502	424	674	471	725	510
ENSG00000092853	CLSPN	1082	902	132	610	541	356	334	370	360	619	406
ENSG00000134698	AGO4	2265	1083	715	2407	2318	2503	2002	2244	2174	2234	1715
ENSG00000092847	AGO1	2450	1543	1570	4088	3891	4386	3108	2644	2590	3928	2765
ENSG00000126070	AGO3	1818	1312	537	2385	2088	2533	1891	682	1320	1445	1013
ENSG00000092850	TEKT2	163	99	680	156	167	168	175	179	132	162	84
ENSG00000116863	ADPRHL2	1405	1115	1518	1472	1283	1274	1421	1163	1147	1387	1089
ENSG00000171812	COL8A2	80	39	0	91	83	158	90	169	118	130	112
ENSG00000054116	TRAPPC3	3224	2189	2148	2808	2537	2487	2469	2929	2389	3061	2266
ENSG00000116871	MAP7D1	5205	3481	2833	5572	5158	4341	4226	5001	3959	5497	3983
ENSG00000054118	THRAP3	10953	6820	6425	13786	12523	11796	9740	8937	9035	10572	8560
ENSG00000214193	SH3D21	2229	2010	281	2025	2113	2096	2506	2611	2971	2634	1886
ENSG00000142694	EVA1B	410	404	190	340	326	292	433	423	380	381	284
ENSG00000196182	STK40	2124	1449	1170	3857	3375	2732	2514	2147	2265	2445	1806
ENSG00000181817	LSM10	1058	725	1561	799	763	740	686	740	576	864	601
ENSG00000116885	OSCP1	609	441	545	506	440	442	504	606	460	543	401
ENSG00000116898	MRPS15	5318	4722	1852	3273	2730	2579	3006	3901	2979	4287	2899
ENSG00000119535	CSF3R	652	422	1	533	353	328	424	488	525	450	179
ENSG00000163873	GRIK3	0	0	0	7	1	8	1	0	1	5	0
ENSG00000163874	ZC3H12A	1090	3966	325	2297	1759	1246	1592	953	1543	1358	1077
ENSG00000163875	MEAF6	2265	1523	1034	2667	2326	2617	2304	1812	1791	2059	1728
ENSG00000163877	SNIP1	1017	872	337	1329	1151	1257	1156	914	929	981	928
ENSG00000163879	DNALI1	21	34	620	21	25	27	14	25	10	26	10
ENSG00000134697	GNL2	5486	4949	409	4901	4491	4987	5132	2402	3412	4169	2988
ENSG00000169218	RSPO1	10	0	0	0	1	5	3	23	8	8	4
ENSG00000116922	C1orf109	1235	674	191	1456	1359	1583	1315	1039	1066	1310	1031
ENSG00000134690	CDCA8	1599	992	408	1587	1481	1327	1042	1292	1005	1474	1253
ENSG00000183317	EPHA10	3	2	4	3	1	1	1	7	0	11	1
ENSG00000185090	MANEAL	9	3	35	2	11	5	0	8	3	11	0
ENSG00000196449	YRDC	1073	915	291	925	807	821	776	856	678	1027	763
ENSG00000197982	C1orf122	637	352	1317	648	636	560	546	617	441	620	481
ENSG00000188786	MTF1	1079	824	317	2303	1916	2072	1366	1050	1161	1325	1035
ENSG00000204084	INPP5B	1171	591	304	1188	985	1145	918	1287	987	1243	803
ENSG00000183431	SF3A3	5714	4167	1784	4838	4503	4646	4335	4789	3975	5164	3964
ENSG00000183386	FHL3	1413	919	324	1111	1060	1288	1119	1309	1002	1154	876
ENSG00000183520	UTP11	2107	1570	426	1966	1789	1801	1835	1405	1404	1816	1432
ENSG00000185668	POU3F1	5	2	1	13	14	18	20	6	5	12	8
ENSG00000116954	RRAGC	695	421	156	928	829	811	820	577	615	670	586
ENSG00000214114	MYCBP	898	539	253	983	897	930	878	665	562	864	760
ENSG00000274944	RP5-864K19.6	0	0	0	1	2	0	0	1	1	1	2
ENSG00000131233	GJA9	0	2	4	6	3	2	0	2	2	6	1
ENSG00000158315	RHBDL2	279	293	78	231	193	185	196	227	267	254	197
ENSG00000174574	AKIRIN1	2703	1538	684	3514	3345	3109	2631	2412	2355	2772	2342
ENSG00000168653	NDUFS5	7146	6510	4919	3937	3474	3516	4153	4725	3521	5145	3995
ENSG00000127603	MACF1	7580	5149	3853	19186	16951	17601	10931	8317	10109	9785	7820
ENSG00000183682	BMP8A	61	54	20	30	25	37	58	60	26	50	21
ENSG00000090621	PABPC4	11953	10657	3240	13072	11848	13116	13281	10145	10832	12466	9910
ENSG00000163909	HEYL	0	2	2	21	24	7	8	7	6	2	3
ENSG00000116981	NT5C1A	0	0	0	0	0	0	0	1	0	0	0
ENSG00000116983	HPCAL4	1	0	0	3	1	2	2	2	0	0	3
ENSG00000084072	PPIE	1370	743	1401	1188	1013	1085	978	1235	1007	1256	947
ENSG00000116985	BMP8B	50	31	19	62	58	69	68	34	63	40	23
ENSG00000198754	OXCT2	1	1	1	0	0	1	0	0	0	0	0
ENSG00000043514	TRIT1	1806	1187	140	1648	1437	1499	1496	1214	1297	1670	1206
ENSG00000116990	MYCL	172	39	152	320	264	117	117	222	141	294	130
ENSG00000168389	MFSD2A	529	342	35	1049	780	531	577	369	359	801	591
ENSG00000131236	CAP1	7011	4125	2097	9637	8543	8039	7369	5598	6256	6722	5759
ENSG00000131238	PPT1	3640	2206	953	4364	3824	3897	2859	3196	2894	3822	3149
ENSG00000117000	RLF	2286	2025	72	4143	3564	4014	3032	517	1757	1245	1147
ENSG00000188800	TMCO2	1	0	0	2	0	1	0	0	1	2	0
ENSG00000084073	ZMPSTE24	1572	835	347	3165	2639	2675	1770	1461	1403	1820	1587
ENSG00000049089	COL9A2	734	637	329	868	766	578	610	660	459	1531	528
ENSG00000084070	SMAP2	993	772	1518	1678	1373	1273	973	875	860	845	709
ENSG00000187801	ZFP69B	146	89	37	316	254	286	170	61	131	165	111
ENSG00000187815	ZFP69	386	226	74	355	266	327	271	115	194	238	185
ENSG00000164002	EXO5	236	132	79	198	160	187	193	229	179	194	158
ENSG00000117010	ZNF684	179	94	37	123	126	137	126	48	92	86	50
ENSG00000117016	RIMS3	168	48	25	484	371	320	201	207	163	335	126
ENSG00000066136	NFYC	2882	2063	3243	2017	1816	1788	1777	2722	2083	2669	1668
ENSG00000117013	KCNQ4	215	96	126	239	208	307	248	202	177	241	175
ENSG00000179862	CITED4	2663	2827	27529	2768	2434	1718	2499	2000	1751	2707	1906
ENSG00000171793	CTPS1	3618	2247	779	4509	3947	3807	2759	3313	2821	3944	3158
ENSG00000171790	SLFNL1	60	66	13	113	97	85	85	105	84	130	80
ENSG00000010803	SCMH1	3102	2317	1725	3088	2834	2805	2512	2403	2331	2800	2148
ENSG00000204060	FOXO6	2054	1304	900	1452	1438	905	947	1675	920	1962	1208
ENSG00000127129	EDN2	1326	903	13	548	547	707	812	1385	1468	713	795
ENSG00000127124	HIVEP3	114	57	77	233	168	105	65	146	109	107	69
ENSG00000044012	GUCA2B	1	0	7	1	0	0	0	0	1	0	1
ENSG00000197273	GUCA2A	1	0	0	0	0	0	0	0	0	0	0
ENSG00000198815	FOXJ3	3308	1915	530	5856	4822	5496	4553	3566	3975	3684	3085
ENSG00000177181	RIMKLA	83	80	445	163	130	143	124	91	146	88	75
ENSG00000066185	ZMYND12	8	6	147	6	6	3	5	14	12	17	10
ENSG00000127125	PPCS	2262	1269	1047	2053	1613	1748	1959	1836	1587	2112	1602
ENSG00000186409	CCDC30	173	189	206	125	109	115	117	66	105	103	53
ENSG00000171960	PPIH	2177	1684	934	1465	1318	1528	1609	1608	1384	1924	1424
ENSG00000065978	YBX1	48455	37956	17701	42803	39922	42863	47030	32982	32981	41725	34395
ENSG00000164007	CLDN19	4	5	3	12	8	10	6	11	9	10	5
ENSG00000117385	P3H1	1449	1266	2176	1100	1005	1020	1066	1545	1016	1309	984
ENSG00000164008	C1orf50	29	21	30	42	23	30	49	45	43	33	24
ENSG00000283580	RP5-994D16.12	0	0	0	0	0	0	0	0	0	0	0
ENSG00000274386	RP5-994D16.11	41	42	63	41	38	53	49	39	47	51	34
ENSG00000177868	SVBP	296	177	81	185	200	166	191	220	191	218	198
ENSG00000164010	ERMAP	588	255	163	462	452	374	348	631	537	621	391
ENSG00000164011	ZNF691	503	319	492	308	281	284	278	461	350	397	305
ENSG00000117394	SLC2A1	21101	18398	1731	37141	31968	45675	39583	13596	33224	21276	26139
ENSG00000186973	FAM183A	61	44	235	35	18	37	23	49	42	57	17
ENSG00000117395	EBNA1BP2	3124	2071	667	3072	2650	2858	2760	2444	2165	3082	2302
ENSG00000243710	CFAP57	23	17	187	24	25	22	15	34	22	38	20
ENSG00000179178	TMEM125	449	479	863	462	371	360	505	367	359	440	283
ENSG00000253313	C1orf210	286	184	911	351	308	301	304	230	205	306	222
ENSG00000066056	TIE1	2	3	119	9	8	7	14	6	11	7	5
ENSG00000117400	MPL	34	31	24	32	15	22	13	27	30	36	23
ENSG00000117399	CDC20	3539	2304	744	3209	3346	2620	2161	2794	2063	3395	2744
ENSG00000066322	ELOVL1	3426	2270	3939	3602	3232	3131	2865	2993	2697	3256	2540
ENSG00000159479	MED8	1359	933	659	1070	996	1017	1179	1009	933	1212	873
ENSG00000198198	SZT2	2548	1932	1593	3273	2872	3167	2403	3513	3014	3529	2106
ENSG00000178922	HYI	413	362	223	260	266	275	262	358	299	362	243
ENSG00000142949	PTPRF	29886	20161	32912	57067	51180	52908	35574	36189	33610	34110	27667
ENSG00000066135	KDM4A	2077	1355	1467	3177	2861	2713	1812	2726	2036	2534	1768
ENSG00000126091	ST3GAL3	534	680	731	1200	913	994	1247	597	662	735	554
ENSG00000117407	ARTN	1324	1588	232	1665	1583	1485	2436	872	1533	1329	1360
ENSG00000117408	IPO13	2042	1493	3354	2504	2379	1970	1536	2302	1687	2446	1729
ENSG00000132768	DPH2	1773	1150	903	2034	1881	1932	1607	1557	1391	1874	1460
ENSG00000117410	ATP6V0B	4973	3507	9654	4385	4100	3757	4269	4021	3477	4558	3759
ENSG00000117411	B4GALT2	3147	2515	5853	3095	2842	2936	3041	2521	2333	2933	2299
ENSG00000159214	CCDC24	519	528	2010	415	340	291	383	517	345	536	281
ENSG00000196517	SLC6A9	1265	855	157	1595	1395	1176	969	1779	1136	1762	985
ENSG00000171872	KLF17	3	2	0	2	1	2	0	2	3	1	2
ENSG00000283039	KLF18	1	0	0	1	2	4	0	0	3	6	0
ENSG00000178028	DMAP1	3226	1804	2109	2205	2088	2200	2529	2929	2331	3039	1986
ENSG00000117419	ERI3	2749	1960	4112	2508	2370	2369	2145	2283	1987	2576	2061
ENSG00000187147	RNF220	2389	1508	2281	1849	1645	1768	1815	2077	1723	2117	1695
ENSG00000126106	TMEM53	225	147	567	253	232	209	237	223	214	238	203
ENSG00000198520	C1orf228	468	505	337	280	229	284	345	323	280	329	260
ENSG00000142945	KIF2C	2326	1373	228	2119	1965	1914	1571	1918	1465	2213	1708
ENSG00000142937	RPS8	77434	63391	19796	65586	57892	72621	77525	58067	58282	65066	53925
ENSG00000142959	BEST4	41	67	167	39	30	33	42	42	37	41	18
ENSG00000173846	PLK3	494	952	130	523	419	515	506	395	393	442	350
ENSG00000188396	TCTEX1D4	0	13	65	7	13	13	4	17	7	11	1
ENSG00000222009	BTBD19	137	236	27	134	114	155	162	177	192	186	122
ENSG00000117425	PTCH2	170	152	144	77	80	69	105	158	84	144	87
ENSG00000070785	EIF2B3	1040	721	372	952	893	848	660	836	629	951	759
ENSG00000126107	HECTD3	2234	1723	3314	2128	1888	1890	1956	2063	1772	2268	1517
ENSG00000126088	UROD	2437	1595	2676	1803	1598	1583	1769	2138	1515	2394	1704
ENSG00000162415	ZSWIM5	10	10	196	23	23	16	13	20	27	22	5
ENSG00000186603	HPDL	33	17	10	70	68	45	49	56	34	55	23
ENSG00000132781	MUTYH	1017	629	647	591	513	498	592	850	660	787	579
ENSG00000132773	TOE1	492	231	161	511	478	392	305	397	327	479	399
ENSG00000070759	TESK2	213	137	35	303	212	174	92	323	241	330	161
ENSG00000280670	CCDC163P	81	69	121	70	62	58	78	79	59	69	41
ENSG00000132763	MMACHC	823	756	471	812	916	887	748	630	610	838	673
ENSG00000117450	PRDX1	11123	7030	5270	9572	8287	7779	7754	9579	7746	10017	7902
ENSG00000117448	AKR1A1	5075	3814	9325	3340	3124	3400	3684	3942	3206	4029	2921
ENSG00000132780	NASP	10420	7051	2835	7700	7241	6586	6433	6806	6817	8621	6195
ENSG00000159588	CCDC17	424	403	124	198	191	198	232	370	269	373	226
ENSG00000159592	GPBP1L1	5084	3199	1036	6801	5820	5899	5536	3998	4367	4742	3995
ENSG00000159596	TMEM69	2307	1738	461	2330	2059	2213	2162	1634	1653	2068	1569
ENSG00000197429	IPP	668	403	443	807	663	649	534	605	621	626	493
ENSG00000086015	MAST2	5393	3268	2001	3411	3148	2822	2513	4697	3473	4203	2874
ENSG00000117461	PIK3R3	8114	7060	8727	13598	12837	13631	10331	7780	6914	7268	5897
ENSG00000278139	PIK3R3	0	0	0	0	0	0	0	0	0	0	0
ENSG00000117472	TSPAN1	323	312	5144	619	539	686	653	316	316	257	216
ENSG00000250719	RP11-322N21.2	0	0	0	0	0	0	0	2	0	0	0
ENSG00000085998	POMGNT1	2242	1349	7207	2106	1955	1879	1800	2104	1594	2112	1612
ENSG00000171357	LURAP1	30	22	34	36	38	22	33	39	38	34	29
ENSG00000085999	RAD54L	565	421	93	580	506	470	388	591	432	562	462
ENSG00000132128	LRRC41	4227	2307	2507	5074	4414	4287	3699	4828	3703	4377	3295
ENSG00000173660	UQCRH	11731	8434	2185	8769	7962	8278	9150	7792	7359	9271	8240
ENSG00000117481	NSUN4	1747	1488	857	1837	1611	1826	1556	1421	1343	1680	1324
ENSG00000117480	FAAH	1054	648	3310	775	673	516	642	963	633	991	612
ENSG00000197587	DMBX1	1	3	44	21	13	9	12	2	5	5	6
ENSG00000282881	RP11-49P4.7	0	0	0	0	0	0	0	0	0	0	0
ENSG00000162456	KNCN	0	0	0	1	1	2	0	1	1	0	0
ENSG00000079277	MKNK1	1639	1003	830	1319	1171	1023	990	1354	1066	1446	1072
ENSG00000142961	MOB3C	637	325	160	546	447	348	347	598	470	679	407
ENSG00000123472	ATPAF1	2440	1217	780	2718	2453	2071	1833	1685	1592	2113	1677
ENSG00000186118	TEX38	3	2	30	14	13	5	9	8	9	9	9
ENSG00000159658	EFCAB14	2699	1573	934	5687	5196	4730	3397	2342	2787	3060	2649
ENSG00000142973	CYP4B1	570	80	265	147	88	17	20	332	91	230	116
ENSG00000187048	CYP4A11	31	33	73	22	14	5	4	17	11	38	12
ENSG00000186377	CYP4X1	580	511	91	891	747	870	665	577	570	708	421
ENSG00000186160	CYP4Z1	70	54	2	95	65	35	45	42	53	57	30
ENSG00000162365	CYP4A22	15	6	52	21	7	5	11	10	10	27	6
ENSG00000162366	PDZK1IP1	383	1202	119	1196	645	385	511	407	914	645	511
ENSG00000162367	TAL1	0	2	0	4	1	1	3	3	0	9	5
ENSG00000123473	STIL	1172	811	110	1316	1235	1223	863	725	764	1035	872
ENSG00000162368	CMPK1	2458	1485	558	4957	3529	4145	3289	1534	2013	2237	2066
ENSG00000186790	FOXE3	1	10	3	2	1	0	4	2	0	4	0
ENSG00000186564	FOXD2	2	1	5	5	6	7	9	4	11	1	0
ENSG00000269113	TRABD2B	11	9	52	3	3	1	0	20	13	7	7
ENSG00000279096	AL356289.1	0	1	0	3	0	0	0	0	0	1	0
ENSG00000117834	SLC5A9	48	61	104	49	80	70	65	69	67	47	28
ENSG00000132122	SPATA6	160	116	113	186	280	187	93	185	197	118	83
ENSG00000186094	AGBL4	28	12	20	36	15	14	3	30	7	52	21
ENSG00000162373	BEND5	473	254	259	229	271	188	162	332	397	485	259
ENSG00000162374	ELAVL4	12	10	4	46	23	5	4	3	5	70	9
ENSG00000142700	DMRTA2	5	3	51	16	12	6	4	4	0	8	1
ENSG00000185104	FAF1	2363	1581	968	3154	2842	3418	2886	1930	2054	2139	1803
ENSG00000123080	CDKN2C	115	34	109	97	171	256	258	114	52	98	89
ENSG00000204006	C1orf185	0	0	1	0	0	0	0	0	0	0	0
ENSG00000123091	RNF11	1489	743	567	3864	3039	3005	2258	1256	1640	1644	1633
ENSG00000085831	TTC39A	1283	659	1613	1855	1405	1115	1095	1096	1129	1262	905
ENSG00000085832	EPS15	2300	1343	261	4307	3718	3796	3056	1345	2262	2295	1793
ENSG00000117859	OSBPL9	4219	2587	545	4717	4220	4278	3868	2216	2722	2960	2514
ENSG00000078618	NRDC	8079	6072	2621	10514	8965	8730	6839	5417	6107	6756	5433
ENSG00000169213	RAB3B	146	26	751	187	105	74	54	102	79	91	68
ENSG00000117862	TXNDC12	2311	1414	832	2692	2218	2593	2363	1933	1761	2268	1859
ENSG00000198841	KTI12	329	243	147	376	287	280	270	223	254	307	235
ENSG00000134717	BTF3L4	2464	1464	595	3472	2819	3090	2604	2143	2012	2492	2120
ENSG00000157077	ZFYVE9	796	471	287	2071	1785	1864	986	908	1132	1056	855
ENSG00000154222	CC2D1B	2221	1553	1448	2242	1904	1984	1850	2227	1842	2267	1580
ENSG00000085840	ORC1	447	261	144	710	683	605	396	480	515	516	400
ENSG00000134748	PRPF38A	3177	2083	1652	3266	2966	2818	2650	2018	2142	2539	2049
ENSG00000134744	ZCCHC11	2787	2051	677	3378	3055	3297	2692	1237	1766	1953	1435
ENSG00000116157	GPX7	628	344	477	476	485	492	514	559	464	506	428
ENSG00000182183	FAM159A	0	0	7	0	2	0	1	2	3	2	4
ENSG00000162377	COA7	1307	759	259	1610	1586	1339	1169	749	806	1108	1017
ENSG00000162378	ZYG11B	1362	752	212	2868	2338	2348	1513	1115	1312	1501	1249
ENSG00000203995	ZYG11A	1062	881	166	1262	1153	1213	950	706	792	1120	963
ENSG00000121310	ECHDC2	4950	3429	5671	3775	3676	3246	3788	3914	3132	4332	3110
ENSG00000116171	SCP2	3743	2279	1107	5364	4531	4161	3744	1936	2789	3198	2509
ENSG00000279054	AL445183.1	2	0	1	0	1	0	1	0	0	0	1
ENSG00000174348	PODN	32	5	3	29	29	16	4	60	34	61	13
ENSG00000162383	SLC1A7	12	3	3	13	3	2	1	9	6	14	2
ENSG00000157184	CPT2	680	384	434	835	686	591	466	566	434	632	473
ENSG00000162384	C1orf123	1428	976	1285	849	830	791	845	1188	899	1290	819
ENSG00000162385	MAGOH	1562	1216	301	1066	974	1027	1099	955	934	1254	901
ENSG00000157193	LRP8	2056	1179	31	3116	2825	2916	2395	1215	1781	2227	1620
ENSG00000143006	DMRTB1	20	16	0	23	16	33	24	31	18	56	12
ENSG00000174332	GLIS1	14	8	2	13	14	4	4	34	8	20	25
ENSG00000058804	NDC1	2422	1421	182	5175	4535	4940	3032	1860	2172	2658	2467
ENSG00000058799	YIPF1	914	577	1545	977	827	888	872	985	854	971	674
ENSG00000211452	DIO1	107	47	25	40	55	49	43	155	60	70	46
ENSG00000081870	HSPB11	989	522	408	704	697	573	562	759	646	777	560
ENSG00000116212	LRRC42	1119	524	782	1321	1196	1110	892	1103	950	1181	970
ENSG00000203985	LDLRAD1	46	22	632	28	21	7	8	24	11	27	26
ENSG00000116209	TMEM59	4957	2471	3810	7769	6399	6398	5490	4386	4773	4830	4434
ENSG00000116205	TCEANC2	896	577	747	790	627	725	609	667	676	732	560
ENSG00000256407	RP11-446E24.4	1	1	1	3	3	0	4	2	0	4	3
ENSG00000157211	CDCP2	1	0	0	0	0	0	1	0	0	0	0
ENSG00000215883	CYB5RL	562	464	337	579	493	564	588	521	460	571	335
ENSG00000116221	MRPL37	4586	2670	2622	5179	4810	4677	4191	4024	3721	4414	3695
ENSG00000157216	SSBP3	7666	5303	7438	8474	7930	6601	6890	6239	5139	7563	5555
ENSG00000162390	ACOT11	2272	1409	57	2451	2116	1389	1393	1566	1306	1932	1514
ENSG00000162391	FAM151A	159	103	6	166	145	81	94	132	106	155	126
ENSG00000184313	MROH7	296	164	4	255	197	102	128	131	145	228	165
ENSG00000271723	MROH7-TTC4	13	8	0	9	6	6	7	7	3	14	6
ENSG00000243725	TTC4	54	23	22	39	31	38	28	39	35	50	25
ENSG00000162396	PARS2	372	165	220	419	376	419	341	280	260	325	299
ENSG00000006555	TTC22	308	143	24	429	334	173	176	296	225	324	229
ENSG00000162398	LEXM	8	7	0	26	5	7	11	12	14	12	13
ENSG00000116133	DHCR24	26407	12939	2404	31371	27752	22451	18690	27683	21569	23071	20069
ENSG00000143001	TMEM61	36	17	4	136	99	57	59	37	36	58	29
ENSG00000162399	BSND	58	45	0	171	130	49	62	71	57	140	47
ENSG00000169174	PCSK9	33	18	14	42	52	28	18	37	26	89	31
ENSG00000162402	USP24	3336	2455	731	6457	5706	6747	4291	1927	3057	3237	2462
ENSG00000162407	PLPP3	1179	563	53	2701	2151	2426	1485	1099	1062	1480	1084
ENSG00000162409	PRKAA2	816	607	170	2572	1901	2251	1849	210	658	698	541
ENSG00000187889	C1orf168	62	51	75	171	128	88	70	8	15	37	17
ENSG00000157131	C8A	0	1	0	0	0	0	0	0	0	0	0
ENSG00000021852	C8B	6	3	0	0	1	1	0	1	1	2	1
ENSG00000173406	DAB1	1921	1157	2	1369	1233	1090	774	509	1120	1314	1558
ENSG00000162600	OMA1	371	221	45	591	479	441	351	184	249	290	250
ENSG00000184292	TACSTD2	9966	11220	503	11804	11210	11086	12422	7157	9317	9916	9901
ENSG00000162601	MYSM1	3508	1831	247	5406	4543	5647	4692	652	2127	1872	1237
ENSG00000177606	JUN	7873	23765	7995	6668	5895	7796	8962	4920	7151	6527	6842
ENSG00000172456	FGGY	163	86	420	179	177	195	150	121	143	128	93
ENSG00000134709	HOOK1	393	260	282	392	608	961	501	91	216	190	178
ENSG00000134716	CYP2J2	730	693	169	220	249	452	393	436	465	513	461
ENSG00000162598	C1orf87	1	1	13	2	1	4	0	2	4	4	3
ENSG00000162599	NFIA	3264	2354	4574	3924	3377	3164	2698	1449	1566	2324	1703
ENSG00000162604	TM2D1	1086	740	165	1283	996	1078	1017	505	811	901	662
ENSG00000132849	PATJ	5059	3348	903	7116	6025	5928	4675	2808	4400	4713	3522
ENSG00000240563	L1TD1	7	5	0	7	2	6	2	4	3	7	2
ENSG00000132854	KANK4	2659	1046	0	1404	1432	1225	776	2510	1562	1984	1497
ENSG00000162607	USP1	2683	1125	128	5235	4576	4125	2687	816	1691	1857	1627
ENSG00000116641	DOCK7	1377	898	280	3483	3097	3409	2086	747	1473	1387	1228
ENSG00000132855	ANGPTL3	5	4	0	8	11	16	13	1	3	2	1
ENSG00000125703	ATG4C	180	132	48	257	229	247	200	91	100	145	143
ENSG00000187140	FOXD3	0	0	2	0	1	0	0	0	0	0	0
ENSG00000088035	ALG6	628	363	58	984	749	715	619	374	489	591	471
ENSG00000142856	ITGB3BP	908	706	86	966	876	927	778	421	551	659	555
ENSG00000203965	EFCAB7	458	258	23	484	427	442	337	130	222	248	171
ENSG00000079739	PGM1	1471	736	1096	3949	3039	3321	2446	1923	2448	1899	1736
ENSG00000185483	ROR1	223	177	5	463	405	409	240	194	244	184	162
ENSG00000177414	UBE2U	5	5	1	26	29	15	15	8	6	7	2
ENSG00000158966	CACHD1	370	257	49	795	792	753	494	357	638	453	358
ENSG00000162437	RAVER2	1955	1263	332	2782	2421	2845	2129	1194	1479	1664	1356
ENSG00000162434	JAK1	2691	1567	70	6977	5861	6043	4091	2864	3949	3415	2874
ENSG00000162433	AK4	3593	2271	238	5958	5576	6562	4830	2197	3835	3262	3461
ENSG00000116675	DNAJC6	33	21	3	186	124	107	63	29	19	73	36
ENSG00000213625	LEPROT	2384	1691	677	3790	3002	3020	2775	1643	2386	2355	2058
ENSG00000116678	LEPR	60	46	11	219	156	128	95	15	45	39	36
ENSG00000184588	PDE4B	196	121	7	197	206	290	216	168	342	161	202
ENSG00000118473	SGIP1	258	40	4	11	108	336	406	13	15	55	36
ENSG00000152760	TCTEX1D1	7	0	0	4	2	2	1	1	0	2	1
ENSG00000172410	INSL5	6	1	5	1	1	3	1	5	3	1	7
ENSG00000152763	WDR78	600	460	189	405	419	443	420	248	290	324	236
ENSG00000198160	MIER1	3978	2260	535	4531	4449	4411	2978	1615	2426	2871	2289
ENSG00000116704	SLC35D1	1227	423	127	1903	1845	1478	870	1151	1079	1225	1025
ENSG00000203963	C1orf141	0	0	1	1	0	0	0	0	0	0	0
ENSG00000162594	IL23R	0	0	1	7	6	1	0	0	1	0	0
ENSG00000081985	IL12RB2	549	221	14	853	866	460	201	315	248	500	518
ENSG00000142864	SERBP1	24879	14986	5317	45920	38823	41470	31693	18179	23912	24588	22517
ENSG00000116717	GADD45A	1705	2011	682	3139	2436	2817	3434	1046	1699	2127	2035
ENSG00000172380	GNG12	1710	993	431	5914	4451	4862	3170	1306	2253	1887	1793
ENSG00000162595	DIRAS3	25	22	5	22	19	20	9	16	25	28	25
ENSG00000116729	WLS	2911	1080	5058	3556	2972	2993	2574	2599	2719	2184	2009
ENSG00000116745	RPE65	1	1	0	19	10	10	8	0	7	0	3
ENSG00000024526	DEPDC1	730	334	13	1460	1348	1251	764	157	323	374	348
ENSG00000033122	LRRC7	142	83	5	183	158	178	144	19	63	42	41
ENSG00000066557	LRRC40	798	398	87	1598	1357	1509	1025	152	429	375	388
ENSG00000116754	SRSF11	18658	17673	6212	14362	11561	13535	16040	4338	7425	8083	6187
ENSG00000118454	ANKRD13C	1450	884	110	2352	2196	2272	1843	523	1026	942	804
ENSG00000197568	HHLA3	517	449	2120	268	223	269	270	409	276	331	220
ENSG00000279230	AL158839.1	15	2	1	4	4	3	6	1	9	10	3
ENSG00000116761	CTH	948	846	146	872	809	1081	773	815	693	721	538
ENSG00000050628	PTGER3	13	13	1	40	28	16	3	5	19	27	5
ENSG00000132485	ZRANB2	3782	2367	414	5057	4065	4458	4154	952	1687	1923	1611
ENSG00000172260	NEGR1	148	145	8	240	311	170	106	65	65	158	110
ENSG00000162620	LRRIQ3	11	11	9	14	15	16	11	7	5	7	1
ENSG00000254685	FPGT	233	109	57	430	353	365	279	90	135	181	151
ENSG00000259030	FPGT-TNNI3K	50	41	2	69	66	120	123	9	19	14	25
ENSG00000116783	TNNI3K	4	9	0	2	2	8	5	1	3	2	4
ENSG00000162621	LRRC53	3	0	0	5	0	8	9	1	1	1	1
ENSG00000178965	ERICH3	46	20	690	56	52	81	47	35	35	40	24
ENSG00000116791	CRYZ	866	467	220	1081	945	1032	885	494	617	646	621
ENSG00000162623	TYW3	759	479	81	1105	954	1113	816	226	398	514	409
ENSG00000162624	LHX8	0	0	6	2	1	4	2	0	1	3	0
ENSG00000137968	SLC44A5	37	18	26	39	30	26	22	9	30	13	3
ENSG00000117054	ACADM	1008	556	120	1645	1487	1507	1183	537	865	864	774
ENSG00000137955	RABGGTB	4802	3694	226	5315	4463	4923	4692	3778	4294	5627	3893
ENSG00000057468	MSH4	16	12	18	18	17	29	18	2	9	7	2
ENSG00000154007	ASB17	0	0	0	0	0	0	0	0	0	0	0
ENSG00000184005	ST6GALNAC3	158	102	0	321	321	374	276	86	151	121	158
ENSG00000117069	ST6GALNAC5	58	15	0	316	270	68	58	33	22	179	44
ENSG00000142892	PIGK	608	352	86	1026	902	860	654	369	453	525	525
ENSG00000154027	AK5	34	26	52	22	28	19	10	37	23	45	22
ENSG00000036549	ZZZ3	2020	1153	203	3551	3020	3519	2474	733	1674	1573	1257
ENSG00000077254	USP33	2208	1368	310	3834	3404	3027	2302	1313	1831	2001	1462
ENSG00000180488	FAM73A	560	352	96	1351	1082	1146	781	255	504	488	342
ENSG00000162614	NEXN	272	161	103	66	49	49	76	35	37	82	53
ENSG00000162613	FUBP1	5760	3591	1030	9905	8445	8610	6159	3851	4742	5437	4142
ENSG00000162616	DNAJB4	617	353	81	649	570	593	454	165	345	345	295
ENSG00000137960	GIPC2	8	1	6	4	8	4	2	7	4	5	8
ENSG00000122420	PTGFR	122	40	0	393	256	224	106	51	111	100	59
ENSG00000137959	IFI44L	7075	6878	4	3602	2314	1410	1656	2142	2236	3808	2325
ENSG00000137965	IFI44	7160	5273	0	3880	2810	1799	2383	1926	2304	3571	2532
ENSG00000162618	ADGRL4	0	0	0	2	1	0	1	0	1	0	0
ENSG00000117114	ADGRL2	5154	2873	41	10723	9919	8279	5342	3245	4502	4887	4028
ENSG00000137941	TTLL7	776	728	85	977	979	1320	1355	249	415	345	239
ENSG00000142875	PRKACB	670	398	64	1181	1269	1695	1227	511	803	614	512
ENSG00000203943	SAMD13	28	12	5	24	15	33	22	27	22	18	17
ENSG00000137976	DNASE2B	0	0	0	0	0	0	0	0	0	0	0
ENSG00000117133	RPF1	1608	1061	293	1756	1559	1613	1486	1138	1138	1473	1217
ENSG00000174021	GNG5	4751	3952	3370	3781	3560	3714	4708	3763	3522	4502	3470
ENSG00000117151	CTBS	353	230	21	723	579	668	522	224	306	259	205
ENSG00000117155	SSX2IP	1195	649	73	2093	1876	2064	1351	364	707	736	654
ENSG00000171517	LPAR3	642	465	4	625	594	618	541	508	469	560	437
ENSG00000153898	MCOLN2	24	29	4	7	17	38	17	62	48	21	19
ENSG00000162643	WDR63	2	0	18	2	5	8	13	1	0	2	2
ENSG00000055732	MCOLN3	12	7	31	20	9	16	16	9	13	15	5
ENSG00000097096	SYDE2	309	194	34	606	456	628	361	143	241	183	158
ENSG00000162642	C1orf52	998	634	123	1176	1005	1251	1133	591	870	968	708
ENSG00000142867	BCL10	1153	825	140	2577	2060	2168	1965	673	1247	1026	1053
ENSG00000153904	DDAH1	185	101	877	234	369	663	508	254	362	261	220
ENSG00000142871	CYR61	2180	4976	801	1888	2026	4248	4820	1685	3561	2063	2361
ENSG00000117174	ZNHIT6	1452	1291	806	1357	1244	1444	1276	669	868	962	834
ENSG00000171502	COL24A1	5	8	1	5	9	6	17	1	6	4	5
ENSG00000122417	ODF2L	4042	2942	204	3815	3337	3267	3788	525	816	908	695
ENSG00000137975	CLCA2	201	75	0	362	185	88	60	216	389	377	178
ENSG00000016490	CLCA1	0	0	0	2	0	0	0	6	2	1	1
ENSG00000016602	CLCA4	99	30	0	326	304	118	130	24	57	96	74
ENSG00000097033	SH3GLB1	3095	2075	582	5086	4168	4367	4195	1832	2669	2661	2055
ENSG00000183291	2021-09-15	2805	1763	401	4844	3834	4126	3554	1787	2373	2550	2562
ENSG00000153936	HS2ST1	1264	671	273	2689	2104	2276	1538	671	1108	1117	1052
ENSG00000267561	RP5-1052I5.2	0	0	0	0	0	1	0	0	1	1	1
ENSG00000143013	LMO4	5429	3020	2575	4902	4529	4536	3841	4508	3681	4225	3342
ENSG00000065243	PKN2	1934	1124	129	4578	3673	3995	2751	418	1299	1183	912
ENSG00000137947	GTF2B	1328	1005	258	1237	1096	1121	1033	993	1007	1232	966
ENSG00000137944	KYAT3	1428	809	107	1836	1556	1663	1394	841	945	1075	1038
ENSG00000213516	RBMXL1	1132	794	183	2203	1973	1869	1086	730	851	1122	1058
ENSG00000117226	GBP3	1264	603	4	1749	1288	874	833	349	614	783	579
ENSG00000117228	GBP1	2190	1261	0	2008	1383	889	741	708	772	1694	1385
ENSG00000162645	GBP2	2165	1985	3	3478	2508	1772	2061	808	1148	1784	1553
ENSG00000213512	GBP7	4	1	13	2	0	0	0	0	0	0	1
ENSG00000162654	GBP4	39	31	41	36	38	22	10	25	16	26	33
ENSG00000154451	GBP5	320	377	0	588	430	369	360	158	272	296	335
ENSG00000183347	GBP6	41	8	0	74	60	35	17	35	30	91	66
ENSG00000197147	LRRC8B	649	436	143	1927	1562	1656	1205	270	607	735	580
ENSG00000171488	LRRC8C	37	39	10	201	194	139	104	18	42	59	40
ENSG00000271949	RP11-302M6.4	0	0	0	0	0	0	0	0	0	0	0
ENSG00000171492	LRRC8D	1268	887	389	1165	1047	1018	880	900	724	1152	875
ENSG00000162664	ZNF326	2554	1829	270	2785	2308	2689	2702	498	1109	1093	894
ENSG00000143032	BARHL2	0	0	0	0	0	0	0	0	0	0	0
ENSG00000122482	ZNF644	1166	541	178	2529	2145	2260	1394	156	409	345	344
ENSG00000162669	HFM1	59	22	5	56	53	50	46	9	11	26	20
ENSG00000097046	CDC7	1350	759	63	1327	1209	1141	935	644	917	937	753
ENSG00000069702	TGFBR3	978	367	1	974	966	740	400	812	625	838	491
ENSG00000137948	BRDT	0	2	0	1	0	1	0	0	0	0	0
ENSG00000172031	EPHX4	65	45	4	189	161	203	210	64	68	77	88
ENSG00000230667	SETSIP	91	38	11	157	138	112	105	75	80	94	109
ENSG00000189195	BTBD8	16	20	7	35	41	49	24	12	23	32	9
ENSG00000069712	KIAA1107	0	0	0	0	0	0	0	0	0	0	0
ENSG00000203910	C1orf146	5	2	0	13	2	5	3	2	0	2	0
ENSG00000174842	GLMN	909	668	36	1090	879	1018	876	226	452	542	418
ENSG00000122484	RPAP2	2039	1578	414	2380	2071	2539	2142	600	880	999	734
ENSG00000162676	GFI1	15	6	11	13	16	10	12	11	17	29	11
ENSG00000067208	EVI5	454	238	131	949	690	860	599	169	387	351	303
ENSG00000122406	RPL5	62954	56801	8193	59968	51891	67408	70178	42840	51506	50515	44180
ENSG00000154511	FAM69A	119	73	9	268	196	279	203	91	156	186	146
ENSG00000143033	MTF2	1925	1575	695	1948	1661	1887	1637	759	1173	1461	1087
ENSG00000117500	TMED5	960	684	239	2890	2106	2409	1653	282	625	661	622
ENSG00000122483	CCDC18	440	397	89	428	406	419	424	53	60	119	92
ENSG00000117505	DR1	1635	844	325	3026	2477	2626	2001	1383	1608	1546	1400
ENSG00000137942	FNBP1L	4482	2349	1101	7929	6983	8698	6231	1929	3742	3707	2827
ENSG00000137936	BCAR3	3665	2115	171	4644	4053	4455	4100	2343	3167	3113	3056
ENSG00000067334	DNTTIP2	3319	2620	270	3667	3289	3297	3006	495	1152	1213	956
ENSG00000023909	GCLM	1346	798	159	1782	1403	1463	1438	692	1020	903	901
ENSG00000198691	ABCA4	324	121	4	137	122	106	126	228	240	275	177
ENSG00000137962	ARHGAP29	2097	1572	154	3998	3791	6862	5083	628	2573	1730	1755
ENSG00000117528	ABCD3	2394	1206	151	5006	4561	4136	2908	1119	1975	2010	2061
ENSG00000117525	F3	1732	3082	597	4153	4103	4028	5622	677	3156	1867	2606
ENSG00000143036	SLC44A3	618	490	1109	949	748	865	858	564	687	676	561
ENSG00000117519	CNN3	7481	5142	696	13594	11503	13845	13105	6096	10756	7983	7750
ENSG00000172339	ALG14	563	379	372	510	405	426	393	437	442	514	413
ENSG00000152078	TMEM56	17	11	19	50	34	59	16	6	16	12	17
ENSG00000271092	TMEM56-RWDD3	5	0	0	9	9	8	6	2	3	3	1
ENSG00000122481	RWDD3	109	55	40	90	89	120	91	33	94	77	48
ENSG00000117569	PTBP2	1664	1088	115	1684	1407	1516	1442	591	909	1056	782
ENSG00000188641	DPYD	68	76	1	242	188	128	68	40	60	74	57
ENSG00000162627	SNX7	843	327	62	1397	1264	1020	829	680	660	918	814
ENSG00000117598	PLPPR5	0	0	0	0	0	0	0	0	0	0	1
ENSG00000117600	PLPPR4	11	3	0	49	26	16	5	3	6	21	8
ENSG00000099260	PALMD	655	249	73	734	653	625	620	288	472	436	368
ENSG00000156869	FRRS1	221	118	17	650	539	494	275	263	278	223	189
ENSG00000162688	AGL	2548	1635	76	3657	2521	1377	1145	390	615	686	935
ENSG00000283495	AC096949.1	0	0	0	0	0	0	0	0	0	0	0
ENSG00000117620	SLC35A3	2573	1629	289	4537	3755	4030	3208	577	1315	1282	1144
ENSG00000156875	MFSD14A	1893	946	110	4232	3445	3322	2197	1486	1761	1922	1794
ENSG00000156876	SASS6	675	409	34	942	867	933	715	88	235	261	212
ENSG00000122435	TRMT13	739	428	168	931	813	853	675	114	273	278	241
ENSG00000122477	LRRC39	201	185	8	125	102	139	160	39	63	89	63
ENSG00000137992	DBT	1424	1037	529	1638	1544	1523	1097	676	916	1026	844
ENSG00000137996	RTCA	2307	1487	557	2608	2222	2437	2205	1392	1655	2032	1469
ENSG00000079335	CDC14A	467	289	128	733	671	649	394	212	300	393	361
ENSG00000181656	GPR88	6	0	0	1	4	2	1	5	1	3	5
ENSG00000162692	VCAM1	4	5	0	8	7	6	4	4	1	7	12
ENSG00000162694	EXTL2	545	329	178	837	749	883	593	261	291	381	339
ENSG00000162695	SLC30A7	1610	1229	409	2916	2134	2687	2145	904	1362	1404	1218
ENSG00000117543	DPH5	1543	1102	325	1683	1557	1810	1742	1127	1212	1343	1102
ENSG00000170989	S1PR1	52	48	0	483	289	298	158	113	122	133	107
ENSG00000118733	OLFM3	77	22	0	361	297	50	30	24	33	113	78
ENSG00000060718	COL11A1	19	19	0	37	129	90	30	26	19	80	32
ENSG00000185946	RNPC3	784	484	83	1123	968	1011	1018	322	596	561	373
ENSG00000240038	AMY2B	52	62	42	24	24	21	47	20	42	23	19
ENSG00000243480	AMY2A	0	0	0	2	0	0	1	0	0	0	0
ENSG00000237763	AMY1A	0	0	0	2	3	0	2	1	1	3	0
ENSG00000174876	AMY1B	1	3	0	9	21	7	6	6	6	2	2
ENSG00000187733	AMY1C	2	0	0	0	0	0	0	0	0	0	0
ENSG00000198890	PRMT6	1883	886	93	2386	2098	1952	1507	1566	1232	1771	1580
ENSG00000162631	NTNG1	2060	1517	32	969	767	595	553	1416	900	1255	880
ENSG00000134215	VAV3	6036	3542	591	8196	6436	6204	5263	5253	5244	5056	3808
ENSG00000085491	SLC25A24	438	154	68	1303	1067	939	635	279	516	437	414
ENSG00000196427	NBPF4	13	5	0	5	14	2	0	11	1	6	5
ENSG00000186086	NBPF6	19	6	0	9	6	3	3	19	16	7	5
ENSG00000162636	FAM102B	988	421	12	1753	1731	2411	1462	434	885	847	755
ENSG00000162639	HENMT1	1	1	499	0	0	1	0	0	0	1	0
ENSG00000134186	PRPF38B	6537	6325	649	5138	4450	5049	6254	1088	2498	2845	2011
ENSG00000143107	FNDC7	3	4	0	5	4	3	1	3	2	2	4
ENSG00000116266	STXBP3	1796	894	171	2783	2299	2055	1688	326	933	905	686
ENSG00000162641	AKNAD1	118	47	0	75	52	91	72	105	87	119	47
ENSG00000274068	RP11-475E11.9	0	0	0	0	0	0	0	0	0	0	0
ENSG00000121957	GPSM2	2404	1037	133	3270	2962	2651	2110	1562	2142	2198	1589
ENSG00000121940	CLCC1	1235	659	497	1507	1328	1466	1239	824	1048	1164	836
ENSG00000085433	WDR47	481	273	67	945	845	854	595	437	554	607	456
ENSG00000197780	TAF13	795	629	1038	1010	761	797	689	586	514	682	740
ENSG00000215717	TMEM167B	1168	683	402	1830	1628	1993	1547	1004	1128	1249	1000
ENSG00000179902	C1orf194	31	35	855	7	15	19	24	25	24	32	24
ENSG00000116299	KIAA1324	1457	1060	64508	1172	1162	2402	1932	1891	1798	1878	1055
ENSG00000031698	SARS	5401	3296	5511	6507	5454	6397	5720	5378	5208	5470	4056
ENSG00000143126	CELSR2	3990	1668	3476	3713	3432	3083	2251	5009	3393	4225	2606
ENSG00000134222	PSRC1	1390	699	173	867	831	715	739	1144	795	1011	814
ENSG00000221986	MYBPHL	14	4	2	24	16	12	7	21	16	26	18
ENSG00000134243	SORT1	3102	1713	5592	5857	5790	6206	4635	3890	3638	3485	2990
ENSG00000143106	PSMA5	3637	2304	1055	3478	3103	3284	2937	2947	2639	3586	2800
ENSG00000143028	SYPL2	4	1	9	6	6	10	9	4	6	11	4
ENSG00000162650	ATXN7L2	773	597	386	505	505	479	528	715	582	771	469
ENSG00000174151	CYB561D1	410	224	510	776	682	567	461	529	415	549	402
ENSG00000181754	AMIGO1	107	42	370	367	276	187	145	93	96	146	93
ENSG00000156097	GPR61	13	10	9	7	17	13	9	9	6	16	9
ENSG00000065135	GNAI3	2629	1320	644	5464	4613	4730	3460	2087	2793	2781	2605
ENSG00000134183	GNAT2	0	0	0	0	0	0	0	0	0	0	0
ENSG00000116337	AMPD2	1689	1148	427	2079	1910	1930	1802	1808	1544	2119	1545
ENSG00000168765	GSTM4	4	0	1390	3	3	2	2	2	2	8	1
ENSG00000213366	GSTM2	1980	936	357	955	889	815	954	1690	1114	1400	799
ENSG00000134184	GSTM1	1	0	795	0	0	0	0	0	0	0	0
ENSG00000134201	GSTM5	0	2	3	1	1	0	0	0	1	0	0
ENSG00000134202	GSTM3	1437	644	930	1408	1171	1298	1028	1588	1028	1410	1097
ENSG00000198758	EPS8L3	3	6	22	6	7	4	4	2	3	1	3
ENSG00000184371	CSF1	368	192	793	286	244	289	306	432	340	366	246
ENSG00000168710	AHCYL1	6165	3305	3492	8016	7137	7607	6483	5607	5381	6086	4752
ENSG00000143093	STRIP1	1803	1229	1014	2448	2201	2340	1927	2000	1827	2098	1661
ENSG00000156150	ALX3	2	0	31	0	2	3	3	4	0	2	0
ENSG00000186150	UBL4B	6	1	8	0	0	0	3	3	0	1	2
ENSG00000197106	SLC6A17	3	17	3	74	61	195	174	30	29	16	11
ENSG00000116396	KCNC4	173	97	29	1145	1146	825	746	420	668	544	347
ENSG00000162775	RBM15	757	536	129	1454	1179	1155	936	623	786	835	749
ENSG00000168679	SLC16A4	196	216	45	229	196	160	134	104	139	156	120
ENSG00000134248	LAMTOR5	1347	1150	1025	1233	1000	1210	1310	917	891	1209	1055
ENSG00000143125	PROK1	0	0	3	0	0	0	0	0	0	0	0
ENSG00000143105	KCNA10	0	0	0	0	0	0	0	0	0	0	0
ENSG00000177301	KCNA2	2	0	0	10	5	2	0	0	0	8	0
ENSG00000177272	KCNA3	0	0	0	0	0	0	0	0	0	0	0
ENSG00000143119	CD53	5	3	22	8	9	7	6	2	6	6	6
ENSG00000121931	LRIF1	407	352	135	392	358	424	428	115	216	174	154
ENSG00000156171	DRAM2	1601	1080	164	2145	1758	1885	1961	965	1292	1271	1116
ENSG00000134255	CEPT1	965	546	68	1556	1347	1567	1218	641	1121	1062	756
ENSG00000162777	DENND2D	342	209	617	271	259	220	244	327	320	315	197
ENSG00000064886	CHI3L2	22	72	33	64	62	86	58	72	203	65	27
ENSG00000134216	CHIA	2	1	4	2	0	0	0	0	0	0	2
ENSG00000173947	PIFO	52	26	545	39	33	52	27	40	41	50	24
ENSG00000085465	OVGP1	200	224	832	118	134	186	300	125	161	164	87
ENSG00000116455	WDR77	1249	819	2320	1097	994	985	882	1077	884	1199	869
ENSG00000116459	ATP5F1	7350	4731	1037	8822	7978	8236	7876	5368	5658	6646	6216
ENSG00000143110	C1orf162	103	108	50	59	62	73	97	57	82	88	54
ENSG00000121933	TMIGD3	0	0	1	1	0	2	1	0	0	0	0
ENSG00000282608	ADORA3	0	0	0	0	0	0	0	0	0	0	0
ENSG00000116473	RAP1A	1477	790	298	2167	1663	1752	1525	962	1204	1258	1171
ENSG00000197852	FAM212B	274	238	177	654	594	266	229	261	202	353	256
ENSG00000064703	DDX20	1312	885	132	1737	1587	1731	1330	903	1126	1414	1018
ENSG00000171385	KCND3	5	2	0	8	6	7	3	6	9	5	1
ENSG00000143079	CTTNBP2NL	1326	733	186	2607	2318	2185	1630	813	1522	1247	1113
ENSG00000134245	WNT2B	414	289	73	363	360	243	276	217	307	275	186
ENSG00000007341	ST7L	371	310	153	452	408	422	344	300	300	360	268
ENSG00000116489	CAPZA1	7784	4590	582	10145	8277	8502	7371	4525	5422	6402	5222
ENSG00000155363	MOV10	5085	3950	3244	3680	3335	2627	2581	4912	3220	4920	3123
ENSG00000155366	RHOC	5350	3922	14825	4025	3705	3490	4252	4134	3338	4284	3404
ENSG00000271810	RP11-426L16.10	1	1	0	1	0	0	0	0	0	0	0
ENSG00000155367	PPM1J	145	119	69	82	91	70	81	140	111	157	100
ENSG00000184599	FAM19A3	37	12	0	68	57	33	30	42	33	64	24
ENSG00000155380	SLC16A1	4323	2684	92	10739	8300	8335	5609	2321	4021	4451	4546
ENSG00000198799	LRIG2	2518	1708	316	2425	2118	2377	2182	1933	2043	2330	1653
ENSG00000081026	MAGI3	3073	1624	148	4500	3667	3300	2339	1365	2340	1902	1510
ENSG00000116793	PHTF1	1110	769	242	1317	1185	1096	1056	844	812	1029	737
ENSG00000081019	RSBN1	917	911	1952	1645	1294	1586	1045	573	840	887	768
ENSG00000134242	PTPN22	1	8	2	5	5	4	8	2	8	2	3
ENSG00000188761	BCL2L15	51	37	6	70	58	62	69	36	45	43	33
ENSG00000134262	AP4B1	964	617	178	1000	819	851	991	876	849	982	695
ENSG00000118655	DCLRE1B	551	301	155	682	698	753	524	470	479	503	441
ENSG00000163349	HIPK1	2310	1227	551	5373	4499	4724	3040	2202	2703	2897	2179
ENSG00000116774	OLFML3	340	56	8	78	73	48	33	707	169	259	150
ENSG00000134207	SYT6	8	3	2	14	7	2	2	3	0	10	4
ENSG00000197323	TRIM33	5057	4349	1541	7264	5950	6363	5685	1703	2885	3453	2589
ENSG00000116752	BCAS2	1198	692	152	1679	1475	1450	1226	522	702	846	757
ENSG00000175984	DENND2C	234	158	0	520	468	224	248	181	319	294	222
ENSG00000116748	AMPD1	0	2	1	2	1	2	0	0	0	1	3
ENSG00000213281	NRAS	2139	1182	500	4958	4255	4537	3278	1632	2158	2219	2191
ENSG00000009307	CSDE1	18446	10372	3804	35531	31683	33693	25150	14457	19598	19260	17321
ENSG00000052723	SIKE1	1489	828	283	2133	1942	2041	1614	550	1000	1112	867
ENSG00000198765	SYCP1	0	2	0	0	0	1	0	1	1	0	0
ENSG00000134200	TSHB	0	0	0	0	0	0	1	0	0	0	0
ENSG00000134198	TSPAN2	56	35	0	123	127	143	124	17	38	31	40
ENSG00000134259	NGF	176	124	0	174	119	82	124	164	180	175	98
ENSG00000173218	VANGL1	2000	846	428	3653	3432	2959	1874	1881	1683	2145	1906
ENSG00000118729	CASQ2	174	43	0	89	117	48	37	64	52	119	149
ENSG00000177551	NHLH2	76	34	0	170	115	59	64	61	34	286	59
ENSG00000163393	SLC22A15	999	544	0	988	807	977	1012	780	918	1083	658
ENSG00000173212	MAB21L3	58	38	3	187	172	129	92	28	34	25	36
ENSG00000163399	ATP1A1	37649	22979	22821	43302	38850	38983	29357	45822	36002	40093	32132
ENSG00000116815	CD58	611	405	66	859	686	683	675	341	487	516	462
ENSG00000143061	IGSF3	1600	840	1001	3188	2738	2431	1551	1933	1632	2127	1693
ENSG00000116824	CD2	0	0	0	0	0	0	0	0	0	0	0
ENSG00000134247	PTGFRN	9917	4405	3195	14640	13431	10929	7262	11123	8308	10549	9622
ENSG00000134256	CD101	265	183	41	155	137	131	130	255	180	292	177
ENSG00000116830	TTF2	2139	1225	360	2586	2279	2205	1665	1973	1755	2402	1669
ENSG00000134253	TRIM45	1927	899	360	974	943	804	842	1418	907	1275	912
ENSG00000134258	VTCN1	3295	1383	8	3603	3420	3009	2828	2001	2249	2560	2441
ENSG00000198162	MAN1A2	3407	2767	3829	5249	4367	4569	3411	1466	2001	2325	1939
ENSG00000183508	FAM46C	379	252	284	781	684	900	584	411	439	467	467
ENSG00000196505	GDAP2	655	426	189	1116	921	966	719	345	534	561	425
ENSG00000065183	WDR3	2462	1576	518	5125	4377	4953	3484	2299	2621	3018	2736
ENSG00000155761	SPAG17	395	196	255	685	604	417	351	270	345	364	232
ENSG00000092607	TBX15	1371	278	43	166	186	157	143	1459	690	979	493
ENSG00000116874	WARS2	1244	663	73	1405	1288	1342	927	1117	1126	1320	1005
ENSG00000116882	HAO2	4	0	0	0	2	2	2	0	3	5	2
ENSG00000203859	HSD3B2	3	0	1	1	0	0	0	1	3	7	0
ENSG00000203857	HSD3B1	0	0	0	0	0	0	0	0	0	0	0
ENSG00000143067	ZNF697	342	153	178	475	507	476	330	337	299	403	292
ENSG00000092621	PHGDH	10442	5617	1641	9575	8294	6470	5421	9839	6304	9712	6127
ENSG00000134240	HMGCS2	162	9	112	91	79	26	12	140	60	92	36
ENSG00000134193	REG4	4	0	41	3	3	1	2	1	1	1	1
ENSG00000134249	ADAM30	0	0	0	0	0	0	0	0	0	0	0
ENSG00000134250	NOTCH2	6285	2375	936	13472	12701	11004	5381	10628	7808	8457	6313
ENSG00000265808	SEC22B	2493	1577	1108	3309	2729	3194	2853	1981	1961	2345	1794
ENSG00000273136	NBPF26	964	641	701	997	879	913	702	1106	891	1125	687
ENSG00000263353	PPIAL4A	3	4	0	1	3	2	2	3	0	4	3
ENSG00000281741	AC241377.1	29	28	11	30	29	30	13	13	22	24	17
ENSG00000198019	FCGR1B	52	22	0	27	23	26	28	27	38	32	15
ENSG00000188610	FAM72B	199	146	8	187	155	161	138	107	112	180	137
ENSG00000171943	SRGAP2C	425	346	158	356	333	341	320	129	203	194	190
ENSG00000203818	HIST2H3PS2	0	0	0	0	0	0	0	0	0	0	0
ENSG00000263513	FAM72C	36	24	0	30	27	25	25	16	21	32	24
ENSG00000271567	PPIAL4E	0	0	0	0	0	0	0	0	0	0	0
ENSG00000266338	NBPF15	1602	1228	522	1655	1476	1567	1590	838	1176	1238	1005
ENSG00000279782	PPIAL4F	0	0	0	0	0	0	0	1	0	0	0
ENSG00000196369	SRGAP2B	116	118	57	197	167	145	169	76	72	88	83
ENSG00000215784	FAM72D	91	96	4	97	83	86	70	49	50	80	71
ENSG00000281571	AC241585.1	10	11	90	11	12	10	16	9	14	16	15
ENSG00000256374	PPIAL4D	0	0	0	0	0	0	0	0	0	0	0
ENSG00000162825	NBPF20	435	359	185	387	318	364	358	275	302	343	300
ENSG00000117262	GPR89A	425	309	209	409	291	369	372	281	287	323	280
ENSG00000174827	PDZK1	26	42	45	49	39	42	34	11	20	32	27
ENSG00000117281	CD160	22	13	14	41	48	35	35	47	42	42	28
ENSG00000265491	RNF115	2817	1654	1607	2774	2418	2492	2477	1760	1998	2363	1825
ENSG00000186141	POLR3C	1432	925	441	1752	1629	1678	1548	1171	1271	1484	1058
ENSG00000186364	NUDT17	278	152	151	257	201	231	265	232	201	248	143
ENSG00000131788	PIAS3	6448	4244	2530	7124	6547	6707	6156	5972	5679	6985	5222
ENSG00000198483	ANKRD35	3744	3480	191	2043	2047	2611	2892	2490	1807	2862	2671
ENSG00000143127	ITGA10	122	107	144	75	94	132	133	168	87	120	71
ENSG00000131779	PEX11B	1296	777	873	1002	887	998	1007	1010	825	1107	809
ENSG00000265241	RBM8A	3109	2217	1865	2942	2480	2851	2708	2397	2185	2844	2454
ENSG00000280778	CH17-270A2.2	0	0	0	0	0	0	0	0	0	0	0
ENSG00000271601	LIX1L	669	473	313	902	814	952	798	540	464	658	572
ENSG00000272031	ANKRD34A	151	160	40	79	84	91	132	126	107	124	86
ENSG00000121851	POLR3GL	351	290	782	228	165	200	293	245	196	255	197
ENSG00000265972	TXNIP	6403	3710	7149	7099	6032	3775	2977	8870	4384	8633	4708
ENSG00000168509	HFE2	2	1	0	0	2	1	3	0	1	2	0
ENSG00000271425	NBPF10	402	232	220	397	354	314	290	473	370	408	316
ENSG00000213240	RP11-458D21.5	0	0	0	0	0	0	0	0	0	0	0
ENSG00000264343	NOTCH2NL	125	83	14	119	76	90	64	60	63	42	46
ENSG00000270339	AC243756.1	4	6	1	0	6	0	0	8	1	3	1
ENSG00000268043	NBPF12	1550	1063	1119	1659	1591	1652	1303	1634	1622	1866	1286
ENSG00000131791	PRKAB2	883	410	210	1787	1466	1596	1081	784	910	1110	858
ENSG00000131781	FMO5	163	125	109	285	225	210	190	86	108	145	114
ENSG00000131778	CHD1L	3246	2310	738	3125	2820	2692	2679	2335	2418	3026	2440
ENSG00000116128	BCL9	1646	770	1931	2650	2633	2335	1536	1942	1545	2140	1341
ENSG00000162836	ACP6	575	407	960	797	748	1046	972	555	637	698	468
ENSG00000265107	GJA5	26	8	0	18	18	3	4	15	6	7	16
ENSG00000121634	GJA8	0	0	0	0	0	0	0	0	0	0	0
ENSG00000188092	GPR89B	316	231	111	277	252	281	297	208	203	269	212
ENSG00000263956	NBPF11	1480	873	361	1324	1090	1361	1275	1222	1443	1374	937
ENSG00000280649	AC245100.1	67	48	149	108	59	68	72	63	59	50	42
ENSG00000236334	PPIAL4G	4	13	4	2	5	1	5	5	5	2	9
ENSG00000270629	NBPF14	2147	1130	394	2179	1849	1643	1652	2301	1943	2179	1477
ENSG00000178104	PDE4DIP	1606	1044	273	2187	2044	2103	1409	1950	1790	1891	1419
ENSG00000269713	NBPF9	923	684	360	1158	1119	1187	1029	925	958	1133	851
ENSG00000271383	NBPF19	2892	1442	225	2421	2141	2039	1894	2932	2387	2752	1904
ENSG00000263464	PPIAL4C	7	6	4	5	0	2	3	4	4	2	5
ENSG00000272058	FAM231D	0	1	3	0	0	2	0	2	2	3	1
ENSG00000150337	FCGR1A	171	93	8	103	92	131	93	56	96	61	43
ENSG00000203814	HIST2H2BF	388	356	35	475	407	379	355	457	468	483	309
ENSG00000183598	HIST2H3D	64	36	3	55	63	52	41	37	61	53	30
ENSG00000270882	HIST2H4A	22	22	7	22	15	10	7	13	11	21	5
ENSG00000203811	HIST2H3C	7	10	0	6	2	2	3	2	2	1	1
ENSG00000203812	HIST2H2AA3	15	112	28	12	10	11	20	15	23	16	18
ENSG00000272196	HIST2H2AA4	14	72	36	21	15	18	6	14	12	27	18
ENSG00000203852	HIST2H3A	3	8	0	2	3	2	1	1	2	7	1
ENSG00000270276	HIST2H4B	6	13	3	8	7	9	0	5	3	9	1
ENSG00000184678	HIST2H2BE	927	1957	906	734	612	450	398	918	725	1083	799
ENSG00000184260	HIST2H2AC	47	150	56	25	19	21	15	23	15	20	27
ENSG00000184270	HIST2H2AB	7	27	4	5	2	5	7	2	7	5	3
ENSG00000178096	BOLA1	34	61	36	12	15	8	5	28	20	18	16
ENSG00000159164	SV2A	545	184	184	596	476	273	225	394	269	574	353
ENSG00000143368	SF3B4	4232	3137	4489	4369	3911	3781	3803	3704	3131	4233	3015
ENSG00000014914	MTMR11	800	445	76	846	686	786	765	807	864	908	582
ENSG00000264522	OTUD7B	2082	1312	1749	2761	2331	2446	1878	1690	1825	1980	1582
ENSG00000136631	VPS45	2641	1612	911	2361	2042	1939	1804	1629	1751	1960	1432
ENSG00000023902	PLEKHO1	3586	2304	2730	2760	2357	2091	2242	2687	2091	2984	1964
ENSG00000143401	ANP32E	10100	7426	1407	10715	9011	9509	8516	3820	5768	7047	5947
ENSG00000118298	CA14	167	192	242	162	148	127	127	141	94	179	151
ENSG00000117362	APH1A	10075	5768	5875	11313	10073	11123	10179	8594	8173	9108	8094
ENSG00000118292	C1orf54	471	185	31	414	457	359	343	315	243	538	325
ENSG00000159208	CIART	455	300	596	202	235	350	393	248	249	343	227
ENSG00000266472	MRPS21	10404	9444	2169	5900	5041	5434	6321	6921	5571	8407	5859
ENSG00000278939	AC242988.1	35	8	2	45	51	49	31	70	58	67	35
ENSG00000117360	PRPF3	7449	5102	530	6139	5475	6223	6024	5684	5621	6651	4687
ENSG00000163125	RPRD2	5705	3962	2331	9541	8717	8301	5596	5535	5513	6120	4492
ENSG00000143374	TARS2	4273	2708	1024	3608	3270	3448	3431	3739	2985	3938	3002
ENSG00000143369	ECM1	895	411	86	792	625	341	468	613	667	822	658
ENSG00000143382	ADAMTSL4	652	552	94	1713	1437	1099	919	1511	1623	1391	834
ENSG00000143384	MCL1	14332	17055	2501	28787	23770	24187	19174	13573	16984	16005	14485
ENSG00000143420	ENSA	15333	10657	5097	13223	12026	11021	10861	12986	10653	14400	10588
ENSG00000143457	GOLPH3L	2050	1440	644	3215	2738	3328	2919	1625	1950	1936	1811
ENSG00000143452	HORMAD1	0	3	0	0	1	0	0	0	1	0	1
ENSG00000163131	CTSS	1299	947	7	2253	1995	1782	1711	987	1318	1309	1305
ENSG00000143387	CTSK	1116	821	110	768	647	615	658	1002	792	1000	681
ENSG00000143437	ARNT	3972	1974	882	6083	5331	5409	4163	3826	3931	4099	3236
ENSG00000283324	RP11-235D19.4	1	3	0	2	5	1	7	3	3	5	1
ENSG00000143379	SETDB1	3592	2314	481	4585	4171	4569	3507	4194	3869	4243	3179
ENSG00000143418	CERS2	2610	1255	417	5370	4654	4611	3031	2871	2872	3029	2651
ENSG00000143412	ANXA9	769	377	326	656	599	560	598	768	639	776	485
ENSG00000143409	FAM63A	1778	807	674	2596	2350	2473	1952	2605	2279	2429	1845
ENSG00000143363	PRUNE1	2466	1314	526	2753	2528	2745	2211	2576	2263	2485	2076
ENSG00000163141	BNIPL	6711	3499	123	2501	2443	1795	2087	7086	4678	5794	3117
ENSG00000143443	C1orf56	616	411	358	429	366	371	332	522	384	463	345
ENSG00000197622	CDC42SE1	12717	6491	2033	14889	12995	11339	9717	14590	12299	14587	10672
ENSG00000213190	MLLT11	1390	506	243	1640	1413	1282	1066	2144	1592	2073	1366
ENSG00000143458	GABPB2	4206	3371	547	3079	2810	2459	2542	3850	3482	3682	2660
ENSG00000143434	SEMA6C	5250	3034	1140	1822	1761	1996	2113	5541	3446	4503	2530
ENSG00000163154	TNFAIP8L2	13	7	5	27	16	28	7	38	31	37	17
ENSG00000163156	SCNM1	3113	2510	2359	1946	1699	1783	2299	2406	1825	2503	1751
ENSG00000163155	LYSMD1	1356	794	446	1279	1155	1232	1146	1190	1098	1279	971
ENSG00000163157	TMOD4	0	0	0	0	0	0	0	0	0	0	0
ENSG00000163159	VPS72	4415	3055	4019	3483	3140	3367	3484	3857	3072	4002	2999
ENSG00000143398	PIP5K1A	8654	5773	2179	8270	7506	7537	7100	8573	7020	8914	6789
ENSG00000159352	PSMD4	10247	6202	5403	7682	6682	6866	6915	8554	6862	9225	6590
ENSG00000143373	ZNF687	3449	2355	2703	4948	4449	4171	3399	3605	3222	3686	2818
ENSG00000143393	PI4KB	6632	3878	2449	7606	6876	6890	5662	7273	5937	6866	5162
ENSG00000143390	RFX5	3525	1965	1079	4019	4021	3509	2577	3449	2683	3843	2785
ENSG00000143416	SELENBP1	14628	5328	8523	6689	6584	3938	3814	14163	6816	9751	5955
ENSG00000159377	PSMB4	18807	15110	11359	13836	12498	13247	14727	14145	12240	16935	12553
ENSG00000143442	POGZ	14889	10414	1721	13147	12257	12003	11495	11036	10789	13126	9009
ENSG00000143375	CGN	7011	4492	328	10683	9741	10272	10024	7103	7226	7839	6480
ENSG00000143367	TUFT1	4676	4342	615	5754	5118	5635	5538	4384	4743	4775	4281
ENSG00000143376	SNX27	4077	2568	1061	4748	4002	4340	3574	3635	3597	3921	3079
ENSG00000159409	CELF3	179	52	70	155	146	89	89	159	101	428	77
ENSG00000178796	RIIAD1	5	4	26	4	6	5	7	7	3	13	4
ENSG00000143436	MRPL9	2415	1596	359	2238	1981	1989	2032	2017	1863	2404	1949
ENSG00000143450	OAZ3	108	112	77	182	92	93	80	91	106	145	111
ENSG00000182134	TDRKH	726	431	124	1353	1114	870	783	578	556	884	625
ENSG00000213171	LINGO4	16	16	70	23	16	5	4	4	4	16	7
ENSG00000143365	RORC	522	399	613	864	611	437	493	490	386	454	320
ENSG00000225556	C2CD4D	126	54	32	106	79	66	62	141	95	101	64
ENSG00000196407	THEM5	144	53	37	156	123	83	74	181	106	226	127
ENSG00000159445	THEM4	2528	1502	233	2295	2075	1971	1964	1633	1645	2106	1645
ENSG00000197747	S100A10	23187	17984	4328	17867	15218	15979	19046	15739	17542	17283	16123
ENSG00000163191	S100A11	33361	28501	19303	20581	18136	16141	20303	21054	18313	24806	17967
ENSG00000182898	TCHHL1	8	5	0	32	30	2	0	1	9	4	3
ENSG00000159450	TCHH	65	43	6	26	40	32	41	58	60	93	34
ENSG00000215853	RPTN	75	17	0	94	118	5	2	24	104	46	15
ENSG00000197915	HRNR	4	2	0	28	29	2	3	7	3	17	2
ENSG00000143631	FLG	164	65	0	342	349	253	99	226	350	303	178
ENSG00000143520	FLG2	12	6	0	15	17	6	4	12	23	26	12
ENSG00000143536	CRNN	44	14	0	38	18	1	1	28	15	25	15
ENSG00000186207	LCE5A	0	0	0	0	0	1	0	0	0	2	0
ENSG00000279850	AL135842.1	0	0	0	0	0	0	0	0	0	0	0
ENSG00000169509	CRCT1	11	10	0	22	6	2	3	3	16	11	3
ENSG00000185966	LCE3E	3	0	0	0	2	0	0	0	0	0	0
ENSG00000163202	LCE3D	0	2	0	2	0	0	0	0	0	0	0
ENSG00000244057	LCE3C	0	0	0	0	0	0	0	0	0	0	0
ENSG00000187238	LCE3B	0	0	0	0	0	0	0	0	0	0	0
ENSG00000185962	LCE3A	0	0	0	0	0	0	0	0	0	0	0
ENSG00000187223	LCE2D	0	0	0	0	0	0	0	0	0	0	0
ENSG00000187180	LCE2C	0	0	0	0	0	0	0	0	0	0	0
ENSG00000159455	LCE2B	0	0	0	0	0	0	0	0	0	0	0
ENSG00000187173	LCE2A	0	0	0	0	0	0	0	0	0	0	0
ENSG00000187170	LCE4A	0	0	0	0	0	0	0	0	0	0	0
ENSG00000198854	C1orf68	0	0	0	0	0	1	0	0	0	1	1
ENSG00000203786	KPRP	2	1	4	3	2	0	2	2	7	9	1
ENSG00000240386	LCE1F	0	0	0	0	0	0	0	0	0	0	0
ENSG00000186226	LCE1E	0	0	0	0	0	0	0	2	0	0	0
ENSG00000172155	LCE1D	0	0	0	0	0	0	0	0	0	0	0
ENSG00000197084	LCE1C	0	0	0	0	0	0	0	0	0	1	0
ENSG00000196734	LCE1B	0	0	0	0	0	0	0	0	0	0	0
ENSG00000186844	LCE1A	0	0	0	0	0	0	0	0	0	0	0
ENSG00000235942	LCE6A	0	0	0	0	0	0	0	0	0	0	0
ENSG00000163206	SMCP	0	0	0	0	0	0	0	0	0	0	0
ENSG00000163207	IVL	51	33	0	38	24	5	7	77	65	63	27
ENSG00000283227	RP1-20N18.10	0	5	0	0	0	0	0	0	1	1	0
ENSG00000184148	SPRR4	1	2	3	8	12	0	1	9	12	14	1
ENSG00000169474	SPRR1A	4506	3961	0	4670	4256	1689	2527	5440	6049	5876	3202
ENSG00000163209	SPRR3	1444	621	0	1990	1446	361	448	835	937	1509	1150
ENSG00000169469	SPRR1B	3955	3683	0	4690	3946	1392	1914	2992	4308	4129	2728
ENSG00000163216	SPRR2D	1810	3406	0	3417	2716	846	1004	1617	2641	2579	1268
ENSG00000241794	SPRR2A	2957	5087	0	7252	6066	2947	3991	2982	5556	4387	2982
ENSG00000196805	SPRR2B	26	61	0	37	23	1	3	29	42	39	19
ENSG00000203785	SPRR2E	535	1209	0	1299	923	189	195	827	864	1021	427
ENSG00000244094	SPRR2F	12	18	0	24	26	3	13	10	12	21	7
ENSG00000159516	SPRR2G	2	4	0	3	2	1	0	11	4	2	1
ENSG00000203784	LELP1	0	0	0	0	0	0	0	0	0	0	0
ENSG00000203783	PRR9	0	0	0	1	0	0	0	0	0	1	0
ENSG00000203782	LOR	0	0	0	0	0	0	0	0	0	1	0
ENSG00000159527	PGLYRP3	54	29	0	70	44	7	5	18	32	70	38
ENSG00000163218	PGLYRP4	113	144	0	131	82	21	29	81	145	174	103
ENSG00000163220	S100A9	26340	29546	13	88300	48427	17617	21747	18770	39256	42522	34634
ENSG00000163221	S100A12	60	58	0	65	31	3	3	38	46	58	22
ENSG00000143546	S100A8	25019	37150	0	30185	15526	5325	7190	20652	27497	30689	17714
ENSG00000184330	S100A7A	114	237	0	631	291	13	13	150	299	342	167
ENSG00000197364	S100A7L2	0	0	0	0	0	0	0	0	0	0	0
ENSG00000143556	S100A7	1751	4567	0	3448	1597	174	161	2512	3060	3717	1619
ENSG00000197956	S100A6	36410	39195	1883	21664	17625	19483	27734	31722	38794	23610	19841
ENSG00000196420	S100A5	70	51	1	59	40	69	81	104	63	119	67
ENSG00000196154	S100A4	8979	9624	206	15443	10201	9771	14434	7298	7959	10420	7972
ENSG00000188015	S100A3	511	355	0	712	546	516	880	258	505	423	423
ENSG00000196754	S100A2	3767	3895	48	3436	3385	5722	8343	3144	5634	4457	5113
ENSG00000188643	S100A16	12261	6733	3611	12071	10351	9682	11926	10434	9675	11276	9295
ENSG00000189334	S100A14	14717	7735	354	10280	7737	5366	7188	11673	8411	12926	8660
ENSG00000189171	S100A13	586	534	303	290	255	224	328	428	322	463	306
ENSG00000160678	S100A1	88	30	250	70	65	47	69	89	54	101	56
ENSG00000160679	CHTOP	9905	6259	2452	9000	8112	8030	8407	9416	8397	10320	7366
ENSG00000143553	SNAPIN	2259	1167	1949	1906	1786	1725	1650	1859	1465	1915	1422
ENSG00000143621	ILF2	16342	9137	3692	17959	16485	17521	14919	15455	13612	16408	13756
ENSG00000169418	NPR1	17	3	149	16	13	6	9	5	9	25	10
ENSG00000143624	INTS3	4099	3813	546	3431	3266	3314	2921	3839	3339	3651	2652
ENSG00000279767	AL513523.2	0	0	0	0	0	0	0	0	0	0	0
ENSG00000143554	SLC27A3	1803	988	558	1229	1170	990	864	1856	1100	1653	1172
ENSG00000143614	GATAD2B	653	500	204	2958	2525	2636	1334	1110	1297	1165	1039
ENSG00000198837	DENND4B	7379	6462	1722	6827	6342	6653	6732	6716	6191	7438	5633
ENSG00000160741	CRTC2	5463	5426	3150	5218	4679	4792	5405	4778	4551	5341	3863
ENSG00000143570	SLC39A1	7669	5015	4503	8302	6849	7046	6693	6754	6241	6774	5850
ENSG00000143578	CREB3L4	2602	1390	4822	1626	1497	1715	1474	2948	1759	2088	1438
ENSG00000143543	JTB	10059	7284	4812	8472	7569	7782	8769	7588	6766	8859	7000
ENSG00000143545	RAB13	12894	10258	5528	8302	6880	6896	8110	9061	7804	9210	7577
ENSG00000177954	RPS27	54971	38909	6186	59113	52809	66474	63899	39886	45342	47503	46470
ENSG00000143552	NUP210L	53	68	37	25	25	33	22	37	44	39	54
ENSG00000143549	TPM3	17443	10459	5474	19636	17752	16666	15941	14543	13171	16962	14328
ENSG00000163263	C1orf189	11	17	6	6	11	11	10	11	11	21	9
ENSG00000143612	C1orf43	16821	10268	3197	21492	19216	20729	18579	14049	14326	16187	14768
ENSG00000143569	UBAP2L	20895	16203	6763	22671	21476	22292	19590	21780	18992	22909	16574
ENSG00000143575	HAX1	6460	4459	3516	4698	4191	4288	4720	4931	4024	5323	4111
ENSG00000143595	AQP10	0	0	0	0	0	0	3	0	0	0	0
ENSG00000143515	ATP8B2	568	258	502	1010	942	749	327	793	497	1093	600
ENSG00000160712	IL6R	1417	666	165	1367	997	863	765	1586	1217	1381	949
ENSG00000169291	SHE	0	2	0	1	1	0	0	3	4	2	1
ENSG00000163239	TDRD10	0	4	0	0	0	0	2	1	0	0	0
ENSG00000160714	UBE2Q1	7205	4875	2711	6379	5524	5431	5697	5652	5130	6434	4837
ENSG00000160716	CHRNB2	29	12	5	125	77	84	31	53	51	103	28
ENSG00000160710	ADAR	26780	14021	3579	44392	38871	34681	21778	34937	26173	31431	24687
ENSG00000143603	KCNN3	70	96	3	110	86	126	86	85	68	139	84
ENSG00000163344	PMVK	2438	1510	2819	2071	1818	1837	1731	2157	1679	2150	1705
ENSG00000163346	PBXIP1	4939	3062	11281	4430	3808	3522	3364	5475	3816	5041	3256
ENSG00000163348	PYGO2	5175	3282	2592	5210	4979	4194	3911	5200	3668	4765	3467
ENSG00000160691	SHC1	10516	8424	652	8474	7511	8473	7924	12681	11499	10965	7333
ENSG00000173207	CKS1B	4231	2737	533	4397	3955	4272	3844	3435	3185	3933	3590
ENSG00000160688	FLAD1	7831	6070	4282	5219	4955	4533	4794	7039	5139	7522	5157
ENSG00000163352	LENEP	31	7	6	19	18	18	10	57	14	27	15
ENSG00000160685	ZBTB7B	12717	7763	6673	18122	14400	12171	10510	14968	12396	13671	9890
ENSG00000163354	DCST2	659	553	268	301	305	323	360	674	555	441	297
ENSG00000163357	DCST1	318	229	21	262	228	172	219	474	331	346	203
ENSG00000143537	ADAM15	22746	17048	4325	22041	20286	18815	19150	27008	20976	22837	16915
ENSG00000243364	EFNA4	1239	868	1895	757	812	732	796	1254	849	1094	803
ENSG00000251246	RP11-540D14.8	0	0	0	0	0	0	0	0	0	0	0
ENSG00000143590	EFNA3	2010	2011	1924	1203	981	1044	1300	1883	1540	1608	1205
ENSG00000169242	EFNA1	8761	12153	1648	7467	6104	6920	8220	6935	8445	7200	7308
ENSG00000169241	SLC50A1	4106	2714	1763	2951	2567	2314	2745	2977	2176	2874	2398
ENSG00000179085	DPM3	771	729	2561	482	421	386	446	564	404	599	463
ENSG00000163463	KRTCAP2	973	826	116	736	704	659	761	843	799	938	685
ENSG00000273088	RP11-201K10.3	0	0	0	0	0	0	0	0	0	0	0
ENSG00000163462	TRIM46	1406	1645	271	1754	1520	1446	1611	1397	1263	1477	1054
ENSG00000185499	MUC1	20226	22205	2172	37133	32463	32538	35837	16218	23599	20972	19928
ENSG00000279986	AC234582.2	0	0	0	0	0	0	0	0	0	0	0
ENSG00000279487	AC234582.1	8	8	0	12	19	13	19	5	9	3	10
ENSG00000169231	THBS3	3274	2302	969	2695	2532	2330	2189	3379	2460	3881	2329
ENSG00000173171	MTX1	1849	1302	2082	1387	1272	1252	1275	1607	1175	1605	1280
ENSG00000177628	GBA	1780	865	1067	2426	2112	1672	1314	1890	1520	2005	1545
ENSG00000160767	FAM189B	1894	1438	217	2239	2168	2064	1975	1646	1566	1974	1526
ENSG00000116521	SCAMP3	2415	1241	1327	3581	3164	3315	2865	2457	2306	2556	2328
ENSG00000176444	CLK2	6069	4339	886	3962	3584	4004	4703	4695	4258	4934	3639
ENSG00000143630	HCN3	110	105	29	96	108	100	94	113	89	135	65
ENSG00000143627	PKLR	1	2	1	2	0	1	0	1	1	0	1
ENSG00000160752	FDPS	5684	3970	989	5173	4537	4052	3983	4808	4315	5580	4587
ENSG00000160753	RUSC1	3913	2374	3569	3096	2845	2201	2223	3677	2538	3134	2606
ENSG00000116539	ASH1L	6216	4461	732	16070	13732	13470	8391	3603	6541	6479	4707
ENSG00000125459	MSTO1	2457	1822	621	1829	1789	1898	2010	2057	1750	2211	1711
ENSG00000163374	YY1AP1	4936	3132	1184	6277	5279	5612	4983	4734	4835	5096	3843
ENSG00000132676	DAP3	11784	8698	1522	11757	10782	10929	10548	9674	9322	11551	9186
ENSG00000116580	GON4L	7635	5758	1713	8154	7408	7729	6864	8248	7032	8411	6320
ENSG00000132718	SYT11	188	70	132	990	872	733	352	300	216	668	262
ENSG00000143622	RIT1	3985	2857	415	5457	4598	5051	4639	3241	3859	3686	3280
ENSG00000132680	KIAA0907	17860	12066	657	13842	12749	14362	15266	12479	13547	15602	10120
ENSG00000173080	RXFP4	8	7	1097	8	10	12	8	16	17	8	16
ENSG00000116584	ARHGEF2	8324	4840	15429	7988	7413	8824	7943	8987	7156	8563	5992
ENSG00000163479	SSR2	17090	12645	14828	17382	15451	19301	19342	14865	15090	15705	13446
ENSG00000160803	UBQLN4	5319	3553	2917	7001	6315	6382	5189	5121	4687	5465	4414
ENSG00000116586	LAMTOR2	4073	3076	6607	3003	2724	2533	2839	3017	2476	3478	2641
ENSG00000132698	RAB25	10139	7738	6939	8735	8239	8366	9807	8326	8103	9941	7419
ENSG00000254726	MEX3A	14764	13908	8960	12167	12214	12963	11548	11114	10139	13457	10179
ENSG00000160789	LMNA	27638	24862	8073	28166	25180	26276	27858	26085	23965	26970	20004
ENSG00000196189	SEMA4A	4814	3130	8808	4977	4440	4308	4223	5227	4275	4817	3214
ENSG00000160785	SLC25A44	3443	1898	1462	4517	4136	3427	3105	3726	3306	3866	2974
ENSG00000260238	PMF1-BGLAP	0	0	2	0	0	0	1	0	0	0	0
ENSG00000160783	PMF1	2559	1947	1678	1579	1365	1460	1774	1953	1623	1941	1550
ENSG00000242252	BGLAP	122	99	26	64	57	90	136	117	110	89	68
ENSG00000160781	PAQR6	1375	1047	423	892	769	638	870	894	786	1110	648
ENSG00000198952	SMG5	8731	5991	3078	12084	10781	10149	9291	8722	8497	9882	7581
ENSG00000163472	TMEM79	3207	1839	959	2928	2622	2042	2185	3411	2948	3730	2443
ENSG00000198715	GLMP	2035	1040	688	2206	2051	2028	1965	2174	1874	2408	1752
ENSG00000189030	VHLL	2	2	0	1	4	1	2	2	1	4	6
ENSG00000163468	CCT3	30246	22407	10475	31671	28591	29986	25328	26092	23260	29648	22862
ENSG00000163467	TSACC	131	72	301	97	96	120	105	134	94	151	100
ENSG00000132677	RHBG	28	22	7	20	13	6	1	55	25	43	32
ENSG00000125462	C1orf61	28	7	0	148	105	31	30	16	20	95	25
ENSG00000116604	MEF2D	4081	3649	1943	6503	5603	5624	4654	5567	4436	5197	3678
ENSG00000183856	IQGAP3	2155	1188	170	1475	1498	1105	973	2069	1407	1975	1464
ENSG00000187862	TTC24	13	6	5	13	13	1	8	6	5	19	0
ENSG00000163382	NAXE	3992	2506	7208	3482	3098	3150	3014	3277	2807	3542	2985
ENSG00000160818	GPATCH4	2176	2073	1335	1172	1034	1031	1291	1261	1084	1541	1213
ENSG00000280316	AL365181.1	16	5	15	13	12	11	17	13	14	12	10
ENSG00000132702	HAPLN2	14	15	5	3	5	4	12	3	5	3	4
ENSG00000132692	BCAN	13	12	6	26	7	4	7	8	10	8	7
ENSG00000132688	NES	2909	916	7	2797	2375	534	393	1297	873	1735	1750
ENSG00000143320	CRABP2	38994	16488	388	14127	13374	7220	7930	30868	14181	27315	17999
ENSG00000143319	ISG20L2	2878	2000	1108	2664	2634	2625	2305	2622	2219	2779	2283
ENSG00000143303	RRNAD1	1302	926	1055	1006	922	993	1039	1197	1097	1136	779
ENSG00000143314	MRPL24	3392	2589	5789	2024	1805	1814	2021	2289	1712	2499	1917
ENSG00000143321	HDGF	21071	11324	9785	22829	20985	20570	19736	17526	16538	19968	17264
ENSG00000143294	PRCC	4345	2835	3787	3919	3800	3465	3279	3981	3183	4216	3151
ENSG00000027869	SH2D2A	118	53	4	87	69	70	74	96	78	101	71
ENSG00000198400	NTRK1	33	23	1	254	219	161	162	85	42	93	45
ENSG00000027644	INSRR	41	38	0	287	247	133	222	74	42	100	25
ENSG00000187800	PEAR1	30	22	3	42	32	18	30	16	40	21	13
ENSG00000160838	LRRC71	60	61	146	42	43	39	72	59	50	81	38
ENSG00000132694	ARHGEF11	6672	4275	2635	8093	7355	7478	6186	7867	7255	7786	5530
ENSG00000253831	ETV3L	2	5	0	0	0	1	1	4	1	1	2
ENSG00000117036	ETV3	1981	1297	194	4622	4166	4328	3165	1975	2546	2433	2099
ENSG00000143297	FCRL5	2	3	0	2	1	0	0	0	0	0	0
ENSG00000163518	FCRL4	1	0	0	0	0	0	0	0	0	0	0
ENSG00000160856	FCRL3	0	0	1	3	4	0	2	0	1	0	0
ENSG00000132704	FCRL2	1	2	0	9	8	3	0	0	1	0	0
ENSG00000163534	FCRL1	0	0	0	0	0	0	0	0	1	0	0
ENSG00000073754	CD5L	0	0	0	0	0	0	0	0	0	0	0
ENSG00000183853	KIRREL	2642	1138	0	3823	3528	3440	2196	3552	3055	3428	2566
ENSG00000158473	CD1D	2	1	3	4	1	1	2	5	3	2	1
ENSG00000158477	CD1A	0	0	0	0	0	0	0	0	0	0	0
ENSG00000158481	CD1C	0	0	0	0	0	0	0	0	0	0	0
ENSG00000158485	CD1B	0	0	0	0	0	0	0	0	0	0	0
ENSG00000158488	CD1E	0	1	0	0	0	0	0	0	0	0	0
ENSG00000186306	OR10T2	1	2	0	0	0	0	0	0	0	0	0
ENSG00000180708	OR10K2	0	0	0	0	0	0	0	0	0	0	0
ENSG00000173285	OR10K1	0	0	0	0	0	0	0	0	0	0	0
ENSG00000198965	OR10R2	0	0	0	0	0	0	0	0	0	0	0
ENSG00000197532	OR6Y1	0	0	0	0	0	0	0	0	0	0	0
ENSG00000186440	OR6P1	0	0	0	0	0	0	0	0	0	0	0
ENSG00000198967	OR10Z1	0	0	0	0	0	0	0	0	0	0	0
ENSG00000163554	SPTA1	0	0	0	0	0	0	2	0	0	1	1
ENSG00000196171	OR6K2	0	0	0	0	0	0	0	0	0	0	0
ENSG00000203757	OR6K3	0	0	0	0	0	0	0	0	0	0	0
ENSG00000180433	OR6K6	0	0	0	0	0	0	0	0	0	0	0
ENSG00000197403	OR6N1	0	0	0	0	0	0	0	1	0	0	0
ENSG00000188340	OR6N2	0	0	0	0	0	0	0	0	0	0	0
ENSG00000163563	MNDA	0	0	0	0	0	0	0	0	0	0	0
ENSG00000163564	PYHIN1	1	1	0	4	3	0	1	0	0	0	0
ENSG00000163565	IFI16	3939	4153	1	7203	4613	4153	4178	1774	3002	3893	2739
ENSG00000163568	AIM2	43	51	0	28	16	27	8	19	23	31	23
ENSG00000162706	CADM3	0	0	0	2	2	7	0	4	4	6	3
ENSG00000213088	ACKR1	1	2	0	2	1	1	0	2	3	1	2
ENSG00000179639	FCER1A	0	0	0	0	0	0	0	0	0	0	0
ENSG00000196266	OR10J3	0	0	0	0	0	0	0	0	0	0	0
ENSG00000196184	OR10J1	0	0	0	0	0	0	0	0	0	0	0
ENSG00000184155	OR10J5	0	0	0	0	0	0	0	0	0	0	0
ENSG00000132703	APCS	0	0	0	0	0	0	0	0	0	0	0
ENSG00000132693	CRP	0	3	0	0	0	0	1	0	1	0	0
ENSG00000158716	DUSP23	150	75	923	137	115	272	357	126	91	92	66
ENSG00000181036	FCRL6	1	3	0	2	1	1	2	4	0	1	1
ENSG00000158714	SLAMF8	56	17	19	71	55	39	53	89	76	70	36
ENSG00000188004	C1orf204	122	44	39	95	90	74	66	114	83	96	69
ENSG00000243284	VSIG8	55	18	6	31	31	13	10	43	25	65	13
ENSG00000256029	RP11-190A12.7	0	0	0	0	0	0	0	0	0	0	0
ENSG00000213085	CFAP45	254	149	100	172	147	159	206	260	191	213	146
ENSG00000158710	TAGLN2	49181	27520	19165	49569	42882	36001	36180	42231	33381	43430	34292
ENSG00000085552	IGSF9	8436	5099	1409	6438	6549	5102	4789	8868	5970	9471	5823
ENSG00000162723	SLAMF9	6	11	2	5	7	5	1	3	9	8	7
ENSG00000177807	KCNJ10	47	23	11	30	30	38	20	27	20	45	20
ENSG00000143315	PIGM	2308	1464	695	2154	1950	2149	1913	1451	1496	1909	1744
ENSG00000162728	KCNJ9	20	29	41	31	17	21	19	33	13	39	19
ENSG00000162729	IGSF8	3164	2121	6628	2556	2304	2029	2041	2750	1934	2803	2104
ENSG00000018625	ATP1A2	663	1310	0	1017	1418	5289	1865	985	1563	1278	1112
ENSG00000132681	ATP1A4	39	99	0	73	139	327	247	49	158	120	81
ENSG00000143318	CASQ1	129	269	48	186	185	266	354	106	195	168	120
ENSG00000162734	PEA15	12684	8702	8258	15275	13000	15490	15539	10922	12395	11953	9837
ENSG00000132716	DCAF8	9511	5625	1998	6800	6479	7203	7502	9523	7996	9881	6940
ENSG00000258465	RP11-574F21.3	0	5	0	5	0	3	1	2	1	5	3
ENSG00000162735	PEX19	3507	1876	1570	4612	4126	4353	3543	3248	2979	3539	2838
ENSG00000122218	COPA	15948	11239	5775	23026	21324	24938	19425	16746	16318	16734	13071
ENSG00000162736	NCSTN	8737	5348	9990	9675	8830	8516	7489	8528	7225	9065	6809
ENSG00000171786	NHLH1	466	224	32	1036	856	543	510	536	373	1263	380
ENSG00000162738	VANGL2	9803	4616	1333	13329	12172	10641	9190	9801	8750	11463	8525
ENSG00000162739	SLAMF6	0	0	0	0	0	0	0	0	0	0	0
ENSG00000066294	CD84	0	1	0	0	0	0	0	0	0	0	0
ENSG00000117090	SLAMF1	0	0	0	0	1	0	0	0	0	0	0
ENSG00000117091	CD48	0	0	0	0	0	0	0	0	0	0	0
ENSG00000026751	SLAMF7	0	1	0	2	0	4	1	1	3	2	1
ENSG00000122224	LY9	0	1	1	0	0	0	0	0	2	0	3
ENSG00000122223	CD244	0	0	61	1	1	0	0	1	0	3	0
ENSG00000179914	ITLN1	2	0	2657	0	0	1	0	0	0	0	0
ENSG00000158764	ITLN2	5	5	359	1	1	1	1	3	1	5	3
ENSG00000158769	F11R	8437	6330	3447	8613	7610	7510	7697	7498	7220	8208	6457
ENSG00000270149	RP11-544M22.13	114	61	10	92	68	61	59	103	65	85	66
ENSG00000215845	TSTD1	2019	1112	695	1194	1195	976	1124	1447	1168	1582	1101
ENSG00000158773	USF1	5422	3960	3772	3672	3404	3061	3506	5016	3690	5058	3529
ENSG00000186517	ARHGAP30	5088	4534	121	5696	4718	3989	5717	4891	6316	5823	4105
ENSG00000278883	AL591806.1	24	142	7	52	34	52	75	29	49	37	46
ENSG00000143217	NECTIN4	17035	12268	748	19444	17411	16111	18072	15161	17961	17691	14389
ENSG00000162755	KLHDC9	412	280	1194	225	238	212	241	315	207	303	163
ENSG00000143256	PFDN2	7742	8189	1760	4122	3627	3768	4982	4616	3770	5946	4461
ENSG00000158793	NIT1	1959	1395	1404	1418	1276	1287	1436	1666	1319	1690	1053
ENSG00000158796	DEDD	3130	2159	1573	2362	2141	2136	2411	2607	2093	2825	1991
ENSG00000143222	UFC1	5628	4270	2085	4278	3852	4087	4431	4197	3843	4957	3900
ENSG00000143258	USP21	4426	3181	2233	3462	3267	3232	3304	4239	3516	4176	3159
ENSG00000143224	PPOX	1570	938	801	1159	1105	1178	1096	1399	1056	1428	989
ENSG00000158850	B4GALT3	4214	2742	1809	4607	4151	4261	4033	3521	3286	4110	3499
ENSG00000158859	ADAMTS4	1219	831	10	1248	1080	1025	862	1560	882	1337	883
ENSG00000158864	NDUFS2	12425	7654	2032	13880	12433	11903	11231	11391	10296	12047	9867
ENSG00000158869	FCER1G	27	33	49	10	7	13	18	27	16	26	21
ENSG00000158874	APOA2	0	0	0	1	0	0	0	0	0	0	0
ENSG00000158882	TOMM40L	536	352	80	733	680	539	480	546	484	674	450
ENSG00000143257	NR1I3	14	9	2	37	22	25	21	11	26	33	6
ENSG00000248485	PCP4L1	39	17	3	72	53	11	17	41	24	21	5
ENSG00000158887	MPZ	31	11	41	20	33	33	19	25	10	23	20
ENSG00000143252	SDHC	6015	3161	1851	7855	6732	6305	4951	5114	4848	5641	4999
ENSG00000188931	CFAP126	0	0	0	0	0	0	0	0	0	0	0
ENSG00000143226	FCGR2A	4	3	0	7	4	5	5	2	4	4	3
ENSG00000173110	HSPA6	320	135	15	1402	964	330	280	92	278	145	201
ENSG00000203747	FCGR3A	4	17	0	8	10	5	5	5	1	9	5
ENSG00000162747	FCGR3B	3	30	0	6	2	1	5	5	4	3	5
ENSG00000072694	FCGR2B	0	0	0	0	1	1	0	1	2	0	0
ENSG00000132185	FCRLA	1	0	0	0	2	2	0	0	1	1	1
ENSG00000162746	FCRLB	1	4	0	5	3	3	4	4	5	5	3
ENSG00000081721	DUSP12	1041	563	103	1416	1320	1248	1030	851	872	1162	895
ENSG00000118217	ATF6	2953	1754	488	6177	5113	6099	4132	2475	3045	3270	2567
ENSG00000162745	OLFML2B	147	56	4	205	152	165	83	221	122	208	99
ENSG00000198929	NOS1AP	381	442	429	498	444	722	457	387	388	435	332
ENSG00000254706	RP11-565P22.6	0	0	0	0	0	0	0	0	0	0	0
ENSG00000239887	C1orf226	869	655	590	889	922	1257	1079	974	921	918	761
ENSG00000171722	C1orf111	18	20	5	87	80	98	68	86	94	113	58
ENSG00000198574	SH2D1B	7	2	0	21	20	7	8	3	10	7	5
ENSG00000152332	UHMK1	4065	2346	129	13750	10261	11855	7279	2877	4974	4716	3788
ENSG00000117143	UAP1	3564	3017	207	8244	6953	9157	7759	2860	5222	3939	3959
ENSG00000162733	DDR2	4534	2549	22	7957	6816	10496	5460	3551	4929	4043	2698
ENSG00000132196	HSD17B7	1122	1087	197	1183	1147	1542	1677	801	1039	1008	955
ENSG00000185860	CCDC190	6	6	6	12	7	5	11	2	8	5	2
ENSG00000117152	RGS4	355	146	25	1301	875	971	835	428	454	597	371
ENSG00000143248	RGS5	10744	3465	494	6037	6186	3323	2414	3470	3333	6450	7549
ENSG00000143228	NUF2	2590	1581	8	2148	1940	1808	1764	346	709	971	769
ENSG00000185630	PBX1	5871	2061	1152	9196	9262	9154	4942	5556	4927	5020	4352
ENSG00000162761	LMX1A	0	1	0	0	1	2	0	0	0	3	4
ENSG00000143171	RXRG	68	19	8	211	159	109	81	82	43	278	84
ENSG00000162763	LRRC52	8	0	0	18	11	4	2	8	5	11	10
ENSG00000143198	MGST3	11995	7618	2331	7571	6807	6507	6607	10248	7813	10867	7607
ENSG00000143149	ALDH9A1	6788	3069	893	9853	8320	7288	5408	5821	5822	6270	5771
ENSG00000143183	TMCO1	6404	4308	1502	7476	6419	7040	6365	4711	4916	5882	5060
ENSG00000143179	UCK2	5321	3764	712	7414	6585	6517	5357	4485	4697	5588	4719
ENSG00000188859	FAM78B	24	14	6	24	16	22	22	16	20	18	7
ENSG00000143157	POGK	6183	3522	1135	9547	8824	8524	6329	5948	5697	6940	5173
ENSG00000152382	TADA1	1211	645	93	2035	1642	1837	1397	769	986	1203	957
ENSG00000143195	ILDR2	13	2	0	56	69	30	8	16	15	58	17
ENSG00000143194	MAEL	310	155	0	94	81	182	132	326	379	189	166
ENSG00000143167	GPA33	51	8	0	21	35	18	12	28	27	28	13
ENSG00000198842	DUSP27	67	19	0	105	121	63	33	81	65	78	50
ENSG00000143190	POU2F1	7013	4936	1353	9422	7793	7468	6478	4121	5575	6356	4339
ENSG00000198821	CD247	15	11	0	44	23	40	28	17	19	21	23
ENSG00000143162	CREG1	3530	2347	186	6452	4830	6293	5239	2540	3384	3372	2927
ENSG00000198771	RCSD1	3	1	3	1	0	1	1	7	3	2	2
ENSG00000197965	MPZL1	6296	3827	5133	8903	8011	9030	6533	6680	5874	6413	5497
ENSG00000143199	ADCY10	16	13	31	15	13	14	18	10	14	9	12
ENSG00000143158	MPC2	1582	1149	850	1393	1229	1352	1350	1162	959	1398	1131
ENSG00000143164	DCAF6	5509	3470	461	7248	6452	6127	5100	3719	4067	4517	3729
ENSG00000143147	GPR161	1687	891	277	1861	1863	2151	1324	2176	1829	1879	1510
ENSG00000143155	TIPRL	3732	2191	255	5267	4306	5056	4421	2671	3137	3527	3023
ENSG00000213064	SFT2D2	7048	4308	382	14092	11776	14500	11197	8319	10334	9529	7958
ENSG00000143178	TBX19	1094	983	73	971	823	1173	1288	1129	1304	1044	708
ENSG00000143185	XCL2	78	89	1	41	32	35	40	31	37	31	21
ENSG00000143184	XCL1	1319	1026	7	576	502	616	676	465	432	635	414
ENSG00000143196	DPT	45	10	0	11	16	27	15	57	42	24	22
ENSG00000143153	ATP1B1	10537	6194	778	13658	11420	11391	10348	8837	12090	9628	10407
ENSG00000143156	NME7	417	255	77	564	490	566	468	371	335	381	335
ENSG00000117475	BLZF1	1542	874	42	2246	1894	1694	1493	310	762	712	628
ENSG00000117477	CCDC181	31	25	31	45	48	69	55	18	25	15	11
ENSG00000117479	SLC19A2	1381	855	31	2118	1804	1830	1573	959	1238	1373	1042
ENSG00000198734	F5	22	15	17	21	28	10	8	24	8	11	23
ENSG00000174175	SELP	11	18	0	11	14	11	3	3	1	2	26
ENSG00000000460	C1orf112	591	475	44	1057	928	1072	689	519	582	630	525
ENSG00000188404	SELL	19	39	4	33	29	6	2	3	0	9	34
ENSG00000007908	SELE	26	23	0	28	29	45	26	12	44	15	23
ENSG00000171806	METTL18	359	221	27	506	437	431	412	200	286	351	278
ENSG00000000457	SCYL3	3099	1567	436	2532	2387	2265	1760	1879	1969	2344	1601
ENSG00000075945	KIFAP3	2799	1340	489	3638	3139	2646	1767	2628	2038	2969	2226
ENSG00000203740	METTL11B	0	0	3	0	1	0	0	1	1	0	0
ENSG00000120370	GORAB	2663	1215	33	2706	2221	2298	2343	447	1159	1132	838
ENSG00000116132	PRRX1	31124	13323	2	44005	36701	25687	18544	19409	20562	24140	17780
ENSG00000117501	MROH9	36	23	0	35	32	52	62	16	15	17	9
ENSG00000007933	FMO3	138	102	4	56	41	63	89	27	27	34	26
ENSG00000094963	FMO2	3554	1825	0	5294	4122	5176	3717	1739	2937	1666	1469
ENSG00000010932	FMO1	13	11	4	11	20	30	21	13	6	11	13
ENSG00000076258	FMO4	339	239	103	360	274	311	275	218	291	255	178
ENSG00000117523	PRRC2C	38563	37174	4083	49895	44187	44954	39225	15903	24721	26592	21025
ENSG00000283683	RP3-454G6.2	12	9	11	9	4	5	9	5	7	3	3
ENSG00000034971	MYOC	1	1	0	0	0	0	0	0	0	0	0
ENSG00000117533	VAMP4	870	528	102	1472	1109	1279	1209	268	598	561	428
ENSG00000010165	METTL13	2307	1253	1002	3055	2913	3064	2149	2408	2306	2462	2158
ENSG00000197959	DNM3	61	71	77	115	94	127	84	59	62	71	77
ENSG00000135845	PIGC	2409	1759	763	2525	2177	2196	2225	1962	1750	2380	1842
ENSG00000180999	C1orf105	78	93	2	55	34	26	37	43	34	73	47
ENSG00000094975	SUCO	4320	2410	284	10577	8684	9285	5525	1354	3141	3309	2519
ENSG00000117560	FASLG	0	0	0	0	0	0	0	0	0	0	1
ENSG00000120337	TNFSF18	34	0	0	28	15	16	12	14	10	11	25
ENSG00000117586	TNFSF4	32	13	8	28	21	26	20	32	39	30	12
ENSG00000117592	PRDX6	18467	12220	4578	15375	13164	13430	12760	13860	12042	16090	12671
ENSG00000162753	SLC9C2	20	14	0	6	9	21	9	12	18	13	7
ENSG00000183831	ANKRD45	163	99	12	137	151	260	158	195	179	167	123
ENSG00000232113	RP11-360D2.1	0	0	0	2	0	1	0	0	0	0	0
ENSG00000076321	KLHL20	1173	675	149	1419	1305	1396	1034	592	836	789	680
ENSG00000120334	CENPL	1104	839	116	1026	953	1006	888	697	704	838	744
ENSG00000117593	DARS2	2890	1760	190	4643	4016	3780	2393	2064	2362	2859	2353
ENSG00000185278	ZBTB37	1422	847	290	3118	2590	2798	1892	1057	1642	1824	1107
ENSG00000117601	SERPINC1	5	3	1	5	4	2	1	6	6	8	5
ENSG00000135870	RC3H1	2807	1763	268	4730	4026	3921	3239	1314	2248	2562	1828
ENSG00000152061	RABGAP1L	3022	2158	294	4382	3710	4294	3166	1325	2266	2561	1881
ENSG00000203737	GPR52	2	0	0	9	4	6	1	2	2	2	0
ENSG00000116161	CACYBP	8523	6164	734	8944	7512	8288	7906	5031	5218	6530	5666
ENSG00000120333	MRPS14	2129	1019	461	2528	2176	2418	1987	1417	1561	1867	1518
ENSG00000120332	TNN	19	10	0	41	20	11	18	39	12	27	9
ENSG00000235750	KIAA0040	1260	583	136	3294	2751	1662	1442	829	1147	1083	1092
ENSG00000116147	TNR	1	3	0	8	6	0	0	5	2	0	1
ENSG00000143207	RFWD2	3804	2264	373	4386	3842	3890	3493	2780	2889	3180	2749
ENSG00000116183	PAPPA2	1	5	5	9	9	7	1	6	7	9	5
ENSG00000152092	ASTN1	13	12	1	18	11	14	7	9	8	36	10
ENSG00000198797	BRINP2	14	14	0	122	156	155	195	16	19	26	36
ENSG00000120341	SEC16B	3	2	4	0	0	1	0	4	3	1	3
ENSG00000075391	RASAL2	2001	1098	207	3176	3490	3125	2035	948	1659	2146	1571
ENSG00000188585	LINC00083	2	0	0	0	0	0	0	0	0	0	0
ENSG00000240021	TEX35	12	4	4	3	3	2	4	18	7	19	6
ENSG00000116191	RALGPS2	1336	758	182	6316	4050	2994	2301	364	916	1512	1122
ENSG00000116194	ANGPTL1	14	6	45	146	118	122	36	18	20	37	21
ENSG00000116199	FAM20B	4192	2372	457	7430	6418	6477	4381	3361	4059	4190	3642
ENSG00000186283	TOR3A	4657	2909	1703	4136	3697	3242	3103	4718	3412	4435	3425
ENSG00000143322	ABL2	5572	4383	945	7671	7014	7161	6492	4516	6242	6188	5162
ENSG00000057252	SOAT1	6746	2707	618	13398	12125	4985	3383	2504	2557	5209	6363
ENSG00000162779	AXDND1	187	196	27	86	90	44	55	74	55	95	101
ENSG00000116218	NPHS2	104	77	0	57	43	9	12	22	19	69	86
ENSG00000162782	TDRD5	444	425	12	211	206	210	178	337	300	233	205
ENSG00000143340	FAM163A	26	4	0	2	4	4	0	1	0	11	18
ENSG00000169905	TOR1AIP2	5405	3690	1246	7213	6274	6225	5531	3517	4220	4925	3847
ENSG00000143337	TOR1AIP1	2346	1347	204	4636	3832	3945	2616	1779	2169	2187	2174
ENSG00000135837	CEP350	3390	2030	316	10663	8298	8951	4732	859	2101	1759	1494
ENSG00000116260	QSOX1	14750	14639	973	37055	33008	31170	28651	14658	22536	18293	18108
ENSG00000121454	LHX4	357	166	8	627	527	568	411	487	502	573	344
ENSG00000230124	ACBD6	4593	3339	696	4031	3605	3945	3989	3462	3156	4121	3148
ENSG00000143324	XPR1	4580	2852	307	8524	7688	9046	6081	3377	4635	5173	5065
ENSG00000135835	KIAA1614	898	507	56	1167	1146	1069	747	1336	851	1293	751
ENSG00000135823	STX6	5943	3751	586	8224	6954	7858	5996	4990	5022	6050	4788
ENSG00000153029	MR1	241	158	13	222	204	300	200	281	315	346	219
ENSG00000162783	IER5	5837	8661	106	6385	5879	5825	6632	5148	5461	6190	4754
ENSG00000198216	CACNA1E	729	854	0	139	226	782	467	1602	1358	934	696
ENSG00000179930	ZNF648	3	13	4	11	13	10	4	5	15	6	6
ENSG00000135821	GLUL	17156	18242	3574	26187	23700	20040	17628	17025	18198	18762	17091
ENSG00000203730	TEDDM1	17	20	11	12	11	8	8	8	6	6	5
ENSG00000121446	RGSL1	1	0	0	3	2	1	4	1	1	0	0
ENSG00000135828	RNASEL	454	278	101	734	603	543	456	488	557	541	356
ENSG00000143333	RGS16	3246	5161	29	4124	3873	3943	3920	3068	2739	4572	2758
ENSG00000135824	RGS8	9	1	0	17	9	4	5	29	11	35	7
ENSG00000135838	NPL	121	91	0	96	90	87	113	114	99	150	81
ENSG00000135829	DHX9	11386	6996	2313	19276	17884	16900	11353	10506	10791	12742	10350
ENSG00000157060	SHCBP1L	1	0	0	0	0	0	0	0	0	0	0
ENSG00000135862	LAMC1	8365	4952	1134	22954	20238	18536	13378	7666	10859	11235	10416
ENSG00000058085	LAMC2	3853	4400	564	15103	13901	18015	13022	4183	13937	5539	8020
ENSG00000157064	NMNAT2	127	148	97	559	500	438	395	197	512	288	248
ENSG00000116698	SMG7	9584	6589	3268	15156	13979	14080	11386	9271	9793	11096	8568
ENSG00000116701	NCF2	1167	477	35	918	744	743	964	1061	826	1014	770
ENSG00000162704	ARPC5	7261	3403	1458	13044	10846	9493	8115	6079	6284	7511	6549
ENSG00000143344	RGL1	2017	1171	529	2652	2272	2587	2218	2348	2510	2477	1558
ENSG00000173627	APOBEC4	6	1	3	7	3	9	4	2	3	2	1
ENSG00000198756	COLGALT2	606	210	250	641	671	390	185	306	230	570	631
ENSG00000198860	TSEN15	2409	1398	338	2904	2459	2597	2339	1419	1466	1982	1665
ENSG00000116667	C1orf21	733	682	99	1479	1410	1368	1218	1608	1898	1049	647
ENSG00000116406	EDEM3	1484	814	69	3784	3100	3407	2065	381	1157	1063	845
ENSG00000135842	FAM129A	1719	1272	373	2068	1816	2404	1791	2221	2363	1706	891
ENSG00000121481	RNF2	1168	727	90	1947	1757	1740	1337	926	1140	1223	1083
ENSG00000121486	TRMT1L	688	449	37	1067	991	1069	747	310	483	500	411
ENSG00000116668	SWT1	542	297	133	537	474	472	415	142	235	266	184
ENSG00000116679	IVNS1ABP	13583	7865	546	14884	13547	15532	12953	7728	11991	11806	9800
ENSG00000143341	HMCN1	322	155	3	138	288	551	191	374	528	403	331
ENSG00000116690	PRG4	46	35	3	22	14	19	28	25	34	34	45
ENSG00000047410	TPR	20389	13947	1601	23526	22176	23360	21521	3410	5260	5414	4728
ENSG00000157181	C1orf27	2907	2308	152	3386	2957	3301	3356	470	962	905	814
ENSG00000279374	AL596220.1	1	2	0	3	1	2	1	0	0	0	0
ENSG00000262180	OCLM	61	53	1	116	111	141	123	25	58	43	27
ENSG00000116703	PDC	18	6	1	24	17	31	18	5	9	13	8
ENSG00000073756	PTGS2	1256	1305	0	2093	2244	3535	2976	799	5094	1507	1809
ENSG00000116711	PLA2G4A	626	438	62	697	926	527	351	541	769	643	612
ENSG00000162670	BRINP3	0	0	17	15	11	2	2	1	1	5	2
ENSG00000150681	RGS18	0	0	0	0	0	0	0	0	0	0	0
ENSG00000253148	RGS21	0	0	0	0	0	0	0	0	0	0	0
ENSG00000090104	RGS1	0	0	0	0	0	0	0	0	0	0	0
ENSG00000127074	RGS13	2	0	0	1	3	1	0	0	0	0	0
ENSG00000116741	RGS2	684	1039	0	273	452	422	470	754	808	859	637
ENSG00000116750	UCHL5	4177	2733	125	6815	5808	6438	5076	1079	2180	2341	2123
ENSG00000116747	TROVE2	2518	1902	764	4835	3708	4591	3164	776	1359	1395	1163
ENSG00000023572	GLRX2	669	426	137	584	505	483	450	500	381	514	416
ENSG00000134371	CDC73	2564	1351	472	5205	4176	4270	3150	1273	1976	1893	1742
ENSG00000162630	B3GALT2	92	61	1	150	140	68	78	24	49	103	41
ENSG00000162687	KCNT2	1	7	0	15	10	13	4	1	0	0	0
ENSG00000000971	CFH	188	370	0	884	1145	1132	876	93	239	262	273
ENSG00000116785	CFHR3	37	15	16	26	31	23	8	5	14	20	5
ENSG00000276911	RP4-608O15.3	0	0	0	0	0	0	0	0	0	0	0
ENSG00000244414	CFHR1	0	0	1	1	0	0	0	1	0	0	0
ENSG00000134365	CFHR4	96	29	1	122	137	107	97	15	30	42	31
ENSG00000080910	CFHR2	0	0	0	0	0	0	0	0	0	0	0
ENSG00000134389	CFHR5	0	0	0	0	0	0	0	0	0	0	0
ENSG00000143278	F13B	1	1	0	0	0	0	0	0	1	0	0
ENSG00000066279	ASPM	2702	1484	6	6720	5335	5427	3417	288	589	752	781
ENSG00000177888	ZBTB41	733	368	46	2955	1864	2663	1332	158	391	343	328
ENSG00000134376	CRB1	10	13	2	21	14	28	22	15	20	8	8
ENSG00000213047	DENND1B	1675	1144	65	5065	3538	3307	2302	418	959	793	711
ENSG00000203724	C1orf53	129	93	152	82	84	89	137	147	101	124	82
ENSG00000143355	LHX9	31	6	9	143	104	80	56	17	22	91	28
ENSG00000151414	NEK7	1681	778	22	5040	4216	4997	3508	375	1455	1125	1118
ENSG00000151418	ATP6V1G3	0	0	0	0	1	0	0	0	0	0	0
ENSG00000081237	PTPRC	0	3	0	3	3	5	3	0	2	1	0
ENSG00000116833	NR5A2	7	2	0	139	88	48	40	10	5	30	10
ENSG00000162702	ZNF281	2199	1525	268	4053	3475	3876	2768	998	1663	1662	1447
ENSG00000118193	KIF14	1648	943	52	2444	2326	2048	1263	228	435	633	525
ENSG00000118197	DDX59	2299	1279	90	2273	1888	1937	1784	1265	1781	1697	1345
ENSG00000118200	CAMSAP2	3082	1654	407	7328	6191	5980	3530	836	2273	2038	1577
ENSG00000170128	GPR25	2	0	1	2	1	1	0	0	7	1	0
ENSG00000163362	C1orf106	1848	1089	521	2973	2895	2559	2001	3249	2410	2483	1792
ENSG00000116852	KIF21B	306	195	30	557	465	484	335	445	415	399	246
ENSG00000081248	CACNA1S	3	0	0	0	2	0	0	3	1	5	0
ENSG00000232237	ASCL5	15	2	2	18	17	12	14	15	24	11	2
ENSG00000116857	TMEM9	6066	3668	5295	5414	4828	4881	4555	5135	4125	5119	4263
ENSG00000163395	IGFN1	1809	891	0	4442	3758	2151	1883	1081	783	2705	877
ENSG00000081277	PKP1	17443	7528	6	21801	19146	15487	9787	19735	17601	19424	16194
ENSG00000118194	TNNT2	516	574	40	568	367	322	412	351	513	495	241
ENSG00000159166	LAD1	7156	4956	11483	10351	8885	7239	6490	6768	7126	8281	6481
ENSG00000159173	TNNI1	176	122	316	401	398	307	306	124	142	168	121
ENSG00000174307	PHLDA3	3152	2329	87	3803	3104	2401	2975	2777	2549	3503	2419
ENSG00000159176	CSRP1	3711	3485	5317	5583	4976	4750	4538	4642	3609	4255	3321
ENSG00000134369	NAV1	6983	4341	1449	12695	11731	11577	7835	7951	7648	8752	6851
ENSG00000198700	IPO9	9198	6122	1659	11959	11038	10186	7425	7495	7398	8973	6585
ENSG00000198892	SHISA4	80	47	331	123	89	64	84	115	82	101	57
ENSG00000163431	LMOD1	66	31	9	104	110	42	64	76	55	115	43
ENSG00000134375	TIMM17A	5135	3087	200	6758	5937	6258	5516	4423	4501	5704	5012
ENSG00000176393	RNPEP	7204	4861	6240	6026	5259	4296	4596	5930	4589	6166	4593
ENSG00000163435	ELF3	19058	37646	2179	23033	18893	20307	24161	16333	24951	18248	18202
ENSG00000170075	GPR37L1	83	91	267	312	254	149	131	98	75	122	51
ENSG00000143862	ARL8A	4867	3266	3141	5165	4483	5063	5694	4353	4304	4844	4006
ENSG00000143851	PTPN7	12	5	3	19	13	21	11	25	12	18	16
ENSG00000133067	LGR6	143	122	45	2145	1765	1156	1147	112	541	281	426
ENSG00000077152	UBE2T	2094	1510	175	1413	1299	1258	1170	1313	1013	1732	1309
ENSG00000077157	PPP1R12B	1944	1414	238	3137	2582	3009	2408	2100	2396	2327	1630
ENSG00000143858	SYT2	473	300	21	1616	1729	1638	971	546	716	934	755
ENSG00000117139	KDM5B	11820	7621	1897	23689	21948	22029	15109	13566	14051	14812	12457
ENSG00000183155	RABIF	1439	942	660	1610	1404	1276	1305	1201	1065	1318	1066
ENSG00000117153	KLHL12	2493	1331	429	3148	2838	2994	2466	2139	2136	2382	1978
ENSG00000159346	ADIPOR1	9543	7322	3496	11546	10136	9873	9749	7402	7776	9048	7345
ENSG00000159348	CYB5R1	4137	2398	991	5758	5044	4616	4971	3363	3270	4292	3531
ENSG00000163444	TMEM183A	7449	4789	2015	9070	8060	8223	7502	6123	6211	6979	6320
ENSG00000143847	PPFIA4	4050	3730	99	5866	5276	4213	4513	3766	5914	4324	3011
ENSG00000122180	MYOG	20	35	0	80	65	21	20	22	18	48	13
ENSG00000163485	ADORA1	7	11	66	26	13	13	12	13	14	29	8
ENSG00000133055	MYBPH	30	30	0	54	27	24	28	29	60	15	14
ENSG00000133048	CHI3L1	5148	7251	0	8695	5319	9184	9946	8868	15494	7795	4261
ENSG00000133063	CHIT1	49	117	1	157	90	47	34	134	120	207	54
ENSG00000159388	BTG2	3685	7521	12079	5313	4957	5286	4236	4081	3275	4239	3162
ENSG00000122176	FMOD	11	7	222	2	11	14	14	14	14	15	11
ENSG00000188783	PRELP	21	13	63	59	57	69	34	50	31	46	26
ENSG00000188770	OPTC	15	8	21	24	23	30	28	14	9	20	23
ENSG00000058668	ATP2B4	16502	7584	2427	38189	34426	33078	18764	19521	17847	21581	17369
ENSG00000122188	LAX1	10	8	5	5	3	7	7	4	1	8	8
ENSG00000058673	ZC3H11A	15547	9906	1243	22584	19522	20500	18040	9536	13489	14154	10510
ENSG00000257315	ZBED6	449	462	381	2197	1726	1891	774	370	735	711	420
ENSG00000182004	SNRPE	5268	3549	324	5195	4663	5078	4774	3683	3494	4615	4397
ENSG00000143842	SOX13	3389	2552	828	6077	5577	5903	5603	3065	3296	3495	3115
ENSG00000143845	ETNK2	203	107	182	412	358	388	317	182	187	165	178
ENSG00000143839	REN	6	6	0	25	18	16	12	2	12	9	7
ENSG00000170498	KISS1	11	5	15	34	11	11	20	5	6	9	9
ENSG00000174567	GOLT1A	39	39	91	91	89	113	127	31	38	53	30
ENSG00000143850	PLEKHA6	1315	868	1860	2949	2760	2415	1929	1773	1550	2815	1155
ENSG00000158615	PPP1R15B	4363	3060	179	9125	7809	7599	5805	3787	4640	4886	4194
ENSG00000133056	PIK3C2B	2589	1130	640	3225	2936	2046	1475	3807	2434	3379	1996
ENSG00000198625	MDM4	13192	10780	968	14104	12626	14980	15009	13377	13821	15789	11316
ENSG00000170382	LRRN2	1270	499	424	1334	1155	1570	1198	1627	1300	1628	824
ENSG00000163531	NFASC	205	413	10	1155	640	494	387	239	240	444	174
ENSG00000184144	CNTN2	335	147	0	1352	849	765	505	532	411	1538	395
ENSG00000174529	TMEM81	449	380	113	233	134	224	221	273	201	309	209
ENSG00000117222	RBBP5	2118	1415	512	2898	2621	2852	2286	2153	2097	2177	1883
ENSG00000133059	DSTYK	3707	2103	1116	3088	2616	2655	2267	3494	2545	3129	2361
ENSG00000133069	TMCC2	923	355	51	873	807	690	639	1182	708	1225	605
ENSG00000163545	NUAK2	844	617	1014	480	493	352	347	818	554	769	557
ENSG00000162873	KLHDC8A	5182	1520	48	1654	1847	971	704	4698	2548	3757	2226
ENSG00000186007	LEMD1	813	455	52	959	790	704	772	631	764	731	697
ENSG00000117266	CDK18	10531	9452	720	11556	10038	10413	11886	8010	8147	8143	6737
ENSG00000174514	MFSD4A	6471	7130	33	6383	6079	10609	10721	3884	7080	5102	6189
ENSG00000158711	ELK4	3634	2771	131	8072	6577	7296	5446	1900	3825	3857	2867
ENSG00000158715	SLC45A3	661	373	115	512	457	469	522	601	547	523	406
ENSG00000069275	NUCKS1	43361	35865	10275	47341	41037	42908	29802	27773	26033	34100	28814
ENSG00000117280	RAB29	2440	1666	19	3113	2616	2544	2211	1958	2018	2356	2051
ENSG00000133065	SLC41A1	2207	1153	197	3216	2876	2669	1886	2551	2287	2424	1913
ENSG00000162877	PM20D1	9	8	0	13	4	3	7	14	15	12	13
ENSG00000174502	SLC26A9	1146	296	49	410	342	210	230	981	539	851	500
ENSG00000276600	RAB7B	274	100	33	180	128	59	65	379	200	379	125
ENSG00000196188	CTSE	8	10	2	4	5	12	5	3	2	5	4
ENSG00000263961	C1orf186	25	22	62	10	12	22	24	3	7	19	4
ENSG00000198049	AVPR1B	5	9	0	26	25	45	22	16	10	16	6
ENSG00000196550	FAM72A	263	190	3	226	196	247	201	124	139	210	184
ENSG00000266028	SRGAP2	2271	1761	715	3633	3385	3387	2322	3049	2510	2972	2174
ENSG00000263528	IKBKE	901	861	288	1230	988	967	967	1130	929	1089	774
ENSG00000266094	RASSF5	1916	578	77	2769	2463	1983	1764	2156	1780	2323	1631
ENSG00000143486	EIF2D	6315	4524	1278	6456	5473	6285	5984	5416	5341	6183	4315
ENSG00000143479	DYRK3	886	529	91	1617	1545	1589	1151	961	974	1015	827
ENSG00000162889	MAPKAPK2	5973	4049	3703	7789	7267	7577	7004	6596	6176	6075	5142
ENSG00000136634	IL10	0	1	0	1	1	1	0	0	1	0	0
ENSG00000142224	IL19	130	214	91	96	232	359	370	103	213	100	170
ENSG00000162891	IL20	1	7	0	16	9	14	15	5	4	7	8
ENSG00000162892	IL24	18	26	2	31	30	40	33	28	40	25	22
ENSG00000162894	FCMR	19	31	3	59	57	130	143	40	77	41	34
ENSG00000162896	PIGR	411	757	5782	2971	3095	3527	2616	596	466	241	305
ENSG00000162897	FCAMR	1	2	1	5	2	5	2	1	4	4	1
ENSG00000182795	C1orf116	3290	1667	229	3498	3243	2901	2703	3445	3051	3050	2530
ENSG00000123836	PFKFB2	2214	1477	163	3534	3087	3479	2883	2836	2935	3156	2450
ENSG00000180667	YOD1	1227	1565	27	2693	1957	2566	2115	376	1062	1058	827
ENSG00000123843	C4BPB	19	22	11	4	16	29	39	10	16	4	7
ENSG00000123838	C4BPA	34	34	225	42	60	105	58	13	72	42	25
ENSG00000196352	CD55	2977	2112	246	3479	3290	4197	3775	2021	3705	2558	2402
ENSG00000117322	CR2	1	2	4	0	0	1	0	0	0	1	3
ENSG00000203710	CR1	0	0	1	0	0	0	3	0	0	1	0
ENSG00000197721	CR1L	0	0	0	0	1	1	0	0	1	0	0
ENSG00000117335	CD46	17459	11279	366	24304	20725	23033	22117	6004	14095	12048	9001
ENSG00000174059	CD34	409	165	3	127	271	61	69	263	149	80	240
ENSG00000076356	PLXNA2	2533	992	856	3244	3231	1554	964	2021	1424	3381	2170
ENSG00000008118	CAMK1G	9	16	0	48	30	66	41	11	34	24	10
ENSG00000196878	LAMB3	862	2129	167	4585	3843	7095	5569	1130	3517	1281	2243
ENSG00000123689	G0S2	0	0	166	1	2	0	0	0	2	0	0
ENSG00000117594	HSD11B1	4	3	2	21	18	26	32	3	2	7	4
ENSG00000009790	TRAF3IP3	37	67	2	72	72	64	30	41	64	57	34
ENSG00000162757	C1orf74	408	555	139	500	448	477	385	449	460	421	367
ENSG00000117595	IRF6	6610	5738	1264	8665	8319	11352	8640	6947	8576	6689	6366
ENSG00000117597	DIEXF	2601	1405	122	5646	4899	5867	4021	2552	3530	3171	2740
ENSG00000143469	SYT14	5	3	0	57	22	23	7	0	5	8	3
ENSG00000283619	AL022397.1	0	0	0	0	0	0	0	0	0	0	0
ENSG00000082497	SERTAD4	6488	4312	0	11641	9586	10992	8457	5842	8188	5902	5670
ENSG00000054392	HHAT	806	668	260	653	542	696	695	756	846	589	451
ENSG00000143473	KCNH1	9	4	0	12	23	10	4	6	10	16	8
ENSG00000117625	RCOR3	5575	3003	401	6391	5407	5679	5401	2770	3751	4208	2848
ENSG00000082512	TRAF5	3275	2273	61	2847	3117	4518	4459	1726	2519	2640	1830
ENSG00000198570	RD3	99	25	3	231	178	123	119	101	58	160	66
ENSG00000170385	SLC30A1	1623	1183	134	5974	4510	4651	2960	945	1918	1951	1761
ENSG00000117650	NEK2	1529	654	31	2168	1979	1942	1500	929	1034	1394	1267
ENSG00000123684	LPGAT1	3648	1559	282	6917	6190	6968	4848	1497	2981	2897	2235
ENSG00000143493	INTS7	2615	1510	121	3109	2928	2532	1788	2524	2066	2435	1910
ENSG00000143476	DTL	1655	1437	131	2275	2214	2088	1390	1368	1229	1456	1381
ENSG00000066027	PPP2R5A	3124	2454	471	6571	5547	6737	5161	1975	3609	2892	3109
ENSG00000065600	TMEM206	1736	1150	276	1894	1634	1508	1314	1205	1224	1729	1398
ENSG00000117691	NENF	4883	3768	1176	3284	2746	2772	3452	3502	2997	3600	2910
ENSG00000162772	ATF3	2558	10065	76	3464	2738	3546	3352	1694	2224	2306	2009
ENSG00000162771	FAM71A	0	2	0	0	1	0	0	0	0	0	1
ENSG00000123685	BATF3	59	103	0	278	212	232	261	69	308	91	183
ENSG00000117697	NSL1	1184	758	166	1423	1122	1214	1041	829	863	1071	833
ENSG00000203705	TATDN3	1624	954	215	1376	1322	1326	1272	985	1015	1269	1029
ENSG00000185523	SPATA45	15	0	11	2	2	3	6	6	4	6	3
ENSG00000162769	FLVCR1	3646	2515	713	4199	3470	3720	3219	1970	2690	3182	2240
ENSG00000143494	VASH2	1151	412	24	1598	1394	1077	552	460	616	1057	664
ENSG00000174606	ANGEL2	3154	1625	227	3589	3268	3150	2884	1870	2482	2913	2073
ENSG00000136643	RPS6KC1	1769	1036	160	2715	2564	2297	1614	1209	1342	1612	1358
ENSG00000117707	PROX1	4	0	34	27	21	9	6	6	5	17	5
ENSG00000143499	SMYD2	5308	2734	186	5156	4792	4234	3815	3724	3728	4172	3859
ENSG00000152104	PTPN14	5727	5089	920	10155	9689	12268	6671	6182	5986	6526	5760
ENSG00000117724	CENPF	11517	7099	270	15422	15178	14920	10028	2106	3098	4614	3866
ENSG00000082482	KCNK2	2536	947	0	1113	1041	562	266	1315	927	1867	1877
ENSG00000136636	KCTD3	9221	4134	415	10507	8975	7628	5696	4177	5234	6141	5479
ENSG00000042781	USH2A	26	30	8	18	11	14	10	11	23	24	19
ENSG00000196482	ESRRG	801	860	23	1282	1196	1904	1001	280	724	705	595
ENSG00000092978	GPATCH2	1652	1090	102	2044	1747	1825	1527	575	1020	1149	830
ENSG00000162814	SPATA17	129	100	217	91	82	112	105	47	62	90	58
ENSG00000067533	RRP15	2038	1497	351	2749	2426	2601	2151	808	1291	1550	1261
ENSG00000092969	TGFB2	158	89	5	712	591	781	658	175	304	260	201
ENSG00000143353	LYPLAL1	2	2	35	2	0	2	0	0	0	0	1
ENSG00000215817	ZC3H11B	371	290	17	471	385	368	354	233	325	257	249
ENSG00000196660	SLC30A10	10	25	0	44	38	28	17	9	40	16	15
ENSG00000136628	EPRS	15261	11145	2793	26701	23988	26195	17791	8482	12333	13500	10316
ENSG00000162813	BPNT1	3262	1840	892	4300	3703	3572	3525	2521	2604	2994	2756
ENSG00000067704	IARS2	11231	6219	573	21129	18605	18263	13251	9088	10573	10843	10866
ENSG00000118873	RAB3GAP2	5067	3714	298	7239	6179	7017	5359	1685	3208	3251	2504
ENSG00000116141	MARK1	1747	636	106	3536	3247	2168	1653	989	1049	2050	1153
ENSG00000162817	C1orf115	1507	891	721	1929	1995	2116	2144	1324	1427	1451	1286
ENSG00000117791	2021-03-02	1209	988	196	1540	1302	1512	1596	851	900	1096	899
ENSG00000186205	2021-03-01	3227	2146	712	4214	3558	3644	3428	2700	2253	2988	2339
ENSG00000136630	HLX	1259	867	39	1611	1262	1166	1171	914	686	1042	802
ENSG00000143507	DUSP10	1545	2057	381	3549	2671	2393	2734	1183	2243	2079	2017
ENSG00000143512	HHIPL2	64	37	0	27	24	13	16	84	27	51	24
ENSG00000143498	TAF1A	203	170	34	364	341	414	297	107	219	217	175
ENSG00000154305	MIA3	4624	3054	1977	7835	6585	8396	5909	2062	3374	3333	2460
ENSG00000186063	AIDA	811	417	231	2115	1809	1888	1125	654	849	853	837
ENSG00000162819	BROX	3119	1537	150	6426	5181	6009	4504	937	2480	2124	1896
ENSG00000197520	FAM177B	27	64	35	49	46	49	36	23	29	19	28
ENSG00000154309	DISP1	220	219	292	262	243	390	335	265	241	285	170
ENSG00000187554	TLR5	523	340	16	519	405	501	446	604	595	519	334
ENSG00000143502	SUSD4	256	125	15	201	140	106	101	289	232	242	117
ENSG00000178395	CCDC185	2	0	0	0	2	0	0	1	1	1	1
ENSG00000203697	CAPN8	315	663	3	436	419	984	1500	240	661	251	316
ENSG00000162909	CAPN2	23390	13967	1063	31125	26951	26342	27248	17660	23214	19900	16702
ENSG00000143514	TP53BP2	5733	2803	417	7435	7036	7253	5396	5053	5294	5533	4394
ENSG00000143756	FBXO28	3192	1652	146	7588	6200	5661	3907	2306	2884	3425	2781
ENSG00000143753	DEGS1	3620	2271	531	3255	2977	2479	2323	2926	2514	3079	2628
ENSG00000143748	NVL	2075	1441	394	2410	2176	2189	1928	1724	1700	1983	1683
ENSG00000143771	CNIH4	2846	2035	730	2802	2284	2362	2287	2296	2185	2545	2041
ENSG00000162923	WDR26	12572	7143	770	17634	15129	15058	12805	8431	10298	11900	8714
ENSG00000143786	CNIH3	309	175	123	153	109	104	126	125	101	102	106
ENSG00000185842	DNAH14	2805	2238	133	2788	2421	3153	2839	794	1303	1565	1092
ENSG00000143815	LBR	4218	2148	102	9857	8754	8519	5407	2988	3939	4597	4210
ENSG00000154380	ENAH	17872	10620	2260	41223	34522	35190	23948	9238	13882	14639	13102
ENSG00000143742	SRP9	8709	4209	769	14860	11728	12473	9769	6052	6568	7882	7588
ENSG00000143819	EPHX1	14751	9807	58769	16375	14393	15859	15142	16220	11242	11705	8926
ENSG00000196187	TMEM63A	7127	5751	2115	7829	6963	8033	8316	7619	7143	8806	6351
ENSG00000243709	LEFTY1	41	74	885	19	15	33	27	34	27	33	44
ENSG00000255835	RP4-559A3.7	0	0	0	0	0	0	0	0	0	0	0
ENSG00000143811	PYCR2	2944	2445	1364	1716	1503	1686	2039	2161	1703	2471	1804
ENSG00000143768	LEFTY2	217	192	115	200	192	327	246	203	163	205	297
ENSG00000143751	SDE2	1606	1189	254	3884	3474	3711	2354	1754	2002	2104	1893
ENSG00000163041	H3F3A	27771	20494	5513	25357	22755	22079	22430	22119	19741	25764	19118
ENSG00000182827	ACBD3	3774	3276	1936	6580	5213	6027	5250	2754	3704	3698	3210
ENSG00000185155	MIXL1	44	53	30	165	84	104	125	40	44	111	43
ENSG00000183814	LIN9	982	701	107	1678	1447	1546	1231	338	628	764	651
ENSG00000143799	PARP1	16960	10375	7115	25366	24678	22866	15378	16929	14368	18816	15400
ENSG00000203685	STUM	210	149	84	704	527	461	310	306	255	611	199
ENSG00000143772	ITPKB	6322	4611	939	9859	9455	9662	6282	8065	6640	7164	6013
ENSG00000143801	PSEN2	1244	780	1060	1087	1041	1307	1171	1235	1158	1329	965
ENSG00000163050	ADCK3	3973	3199	1760	4240	3773	4867	4254	3817	3877	4109	3034
ENSG00000143776	CDC42BPA	5975	3782	847	11544	9651	9915	6568	2762	4254	4044	3125
ENSG00000181450	ZNF678	563	452	76	955	863	1120	769	166	290	290	238
ENSG00000143740	SNAP47	1628	1152	993	2222	2070	1962	1517	1839	1465	1825	1512
ENSG00000081692	JMJD4	314	268	468	241	248	242	254	313	249	319	242
ENSG00000185888	PRSS38	1	0	0	0	0	1	1	2	1	0	1
ENSG00000143816	WNT9A	117	104	33	226	218	222	219	146	153	210	102
ENSG00000154342	WNT3A	11	15	0	26	12	20	11	13	10	10	12
ENSG00000143761	ARF1	35212	27660	20210	38580	34364	36422	37806	30578	28606	34826	27434
ENSG00000143793	C1orf35	4497	4693	2993	2138	2104	2008	2869	3040	2237	3277	2361
ENSG00000162910	MRPL55	3133	2958	2351	1605	1555	1764	2426	2660	1855	2419	1672
ENSG00000143774	GUK1	18369	14662	6582	14254	13042	12677	15159	14484	11635	15684	12015
ENSG00000198835	GJC2	281	168	58	728	728	408	427	144	152	233	222
ENSG00000181873	IBA57	1445	1062	253	2130	2054	1790	1309	1558	1414	1590	1309
ENSG00000162913	C1orf145	1271	552	7	765	704	440	515	1033	688	1105	627
ENSG00000154358	OBSCN	18708	12779	159	24033	20049	17214	13713	21124	17097	23530	14182
ENSG00000154370	TRIM11	3683	3204	1063	3874	3609	3384	3644	3889	3537	3828	2843
ENSG00000162931	TRIM17	581	345	41	461	413	421	442	792	725	680	372
ENSG00000168148	HIST3H3	9	4	0	16	14	14	2	19	15	12	9
ENSG00000181218	HIST3H2A	1124	1133	824	653	594	497	558	958	752	1023	623
ENSG00000196890	HIST3H2BB	202	209	10	123	115	89	123	158	172	175	84
ENSG00000168159	RNF187	11306	5728	7166	9094	7752	7500	7901	9484	7361	9690	6887
ENSG00000116574	RHOU	1758	843	115	3988	2739	2120	1819	1803	1565	2436	1573
ENSG00000177800	TMEM78	1	0	1	0	1	1	1	1	3	1	1
ENSG00000168118	RAB4A	2961	2043	530	3550	2971	3580	3300	2286	2524	2492	2450
ENSG00000213029	SPHAR	0	0	0	0	0	0	0	0	0	0	0
ENSG00000154429	CCSAP	1234	695	103	2291	1938	1696	1136	547	977	1110	935
ENSG00000143632	ACTA1	41	37	1	21	22	10	12	25	22	31	22
ENSG00000069248	NUP133	4030	2209	237	7782	7181	7229	4709	3576	4118	4293	3686
ENSG00000135776	ABCB10	1098	680	95	2375	2004	1824	1175	483	789	880	829
ENSG00000135801	TAF5L	2717	1478	250	4014	3706	3679	3029	1932	2236	2632	2122
ENSG00000135763	URB2	1498	1034	163	3166	2963	2833	1739	1616	1590	1870	1512
ENSG00000143641	GALNT2	1362	1075	780	4537	4735	4525	3423	1608	2157	2094	2122
ENSG00000177614	PGBD5	80	22	7	54	47	45	41	99	73	137	54
ENSG00000135775	COG2	3518	1982	569	4563	3938	4027	3356	3470	3383	3870	2610
ENSG00000135744	AGT	195	419	11	275	193	390	367	413	380	268	142
ENSG00000135773	CAPN9	70	23	198	49	57	31	21	122	55	67	19
ENSG00000119280	C1orf198	12736	5260	2202	16164	14107	13384	10593	17319	10278	12930	8105
ENSG00000143643	TTC13	2143	1472	155	2324	2015	2091	2091	1007	1291	1743	1267
ENSG00000173409	ARV1	2583	1949	214	1821	1703	1779	1897	1670	1454	2124	1541
ENSG00000182118	FAM89A	43	51	0	21	26	20	27	71	81	83	41
ENSG00000119283	TRIM67	13	6	0	5	3	3	9	9	8	8	2
ENSG00000143633	C1orf131	2199	1536	585	1689	1441	1600	1578	1404	1428	1841	1366
ENSG00000116906	GNPAT	5755	3719	630	5791	5262	5401	4890	4043	4198	4819	3762
ENSG00000116903	EXOC8	748	484	22	1676	1370	1376	1027	522	715	788	651
ENSG00000010072	SPRTN	1218	697	165	1957	1718	1588	1251	627	847	998	868
ENSG00000135766	EGLN1	3227	2299	238	10094	8150	8843	6741	1954	4648	3521	3737
ENSG00000270106	TSNAX-DISC1	7	3	0	8	1	3	9	4	5	3	2
ENSG00000116918	TSNAX	2250	1437	393	2476	2143	2369	2254	920	1270	1532	1357
ENSG00000162946	DISC1	1047	1282	282	2504	2620	3621	2799	592	1391	1047	1209
ENSG00000116991	SIPA1L2	3132	2100	75	9243	8401	6481	5532	2009	3659	4419	4359
ENSG00000212916	MAP10	0	0	0	0	0	0	0	0	0	0	0
ENSG00000135778	NTPCR	3041	2124	1029	3115	2823	2959	2994	2222	2338	3025	2306
ENSG00000135749	PCNX2	1803	1758	1306	2223	2386	2565	2315	1120	1236	1604	1133
ENSG00000143674	RP5-862P8.2	881	495	63	2616	2232	2106	1541	260	732	923	819
ENSG00000135750	KCNK1	2145	1632	24	2909	2508	2373	2638	1154	1864	1870	1796
ENSG00000183780	SLC35F3	42	15	0	44	65	30	22	14	16	43	50
ENSG00000168275	COA6	819	754	164	770	551	650	598	462	398	635	531
ENSG00000059588	TARBP1	13170	9487	818	13347	12378	14013	14934	5535	8318	10372	7047
ENSG00000168264	IRF2BP2	8380	9565	2496	11583	9718	12118	11031	7355	8415	8424	7767
ENSG00000279261	AL360294.1	0	0	0	0	1	0	0	2	0	1	0
ENSG00000173726	TOMM20	24305	16445	1175	47093	40423	51295	39092	18067	23736	23344	25664
ENSG00000188739	RBM34	154	129	27	169	129	137	154	163	151	180	104
ENSG00000054267	ARID4B	9913	8673	1195	8000	6881	7222	7717	1490	2477	2887	2366
ENSG00000152904	GGPS1	4011	2476	481	3857	3314	3275	3181	2392	2899	3014	2557
ENSG00000116957	TBCE	3996	2829	283	3734	3280	3435	3198	2654	2812	3497	2582
ENSG00000162885	B3GALNT2	2343	1096	274	3558	3102	3231	2315	1653	2207	2525	1782
ENSG00000168243	GNG4	1195	696	23	1534	1507	1808	1925	817	1574	1572	1436
ENSG00000143669	LYST	5738	3358	137	10449	7146	6140	4494	1364	3019	3234	2539
ENSG00000116962	NID1	5225	2419	3	13169	12731	9627	6243	3970	5580	5745	6201
ENSG00000077585	GPR137B	277	253	22	329	430	592	451	470	441	306	268
ENSG00000086619	ERO1B	710	850	6	832	1162	1741	1179	359	591	511	453
ENSG00000186197	EDARADD	45	50	10	9	31	57	20	70	37	22	38
ENSG00000116977	LGALS8	4707	3171	194	4606	3685	4807	4957	2690	3934	3483	2481
ENSG00000119285	HEATR1	4134	2669	259	10223	9176	9679	5699	3556	4905	5242	3928
ENSG00000077522	ACTN2	1	1	5	4	1	0	1	0	2	2	2
ENSG00000116984	MTR	3125	1696	209	4636	4259	4749	3302	1411	2554	2363	1821
ENSG00000244020	MT1HL1	0	0	0	0	0	0	0	0	0	0	0
ENSG00000198626	RYR2	0	3	0	15	8	5	4	0	1	2	2
ENSG00000116996	ZP4	1	3	0	3	3	0	3	0	3	2	3
ENSG00000270188	MTRNR2L11	0	0	0	0	0	0	0	0	0	0	0
ENSG00000133019	CHRM3	1407	1220	182	3355	3071	3355	2619	527	1250	939	1264
ENSG00000155816	FMN2	0	0	0	0	0	3	0	0	2	0	1
ENSG00000180875	GREM2	0	0	0	0	0	0	0	0	0	0	0
ENSG00000182901	RGS7	1	1	13	1	4	0	2	2	0	8	0
ENSG00000091483	FH	6084	4108	624	6371	5760	5132	4556	4611	4055	5539	4313
ENSG00000117009	KMO	196	148	23	193	167	192	168	90	115	99	71
ENSG00000054277	OPN3	80	54	13	105	89	103	65	66	103	82	85
ENSG00000203668	CHML	1395	699	44	3902	3276	3724	2177	151	406	356	377
ENSG00000162843	WDR64	2	2	10	2	0	1	1	4	0	2	0
ENSG00000174371	EXO1	1423	908	49	1807	1674	1525	1038	1033	1018	1113	1008
ENSG00000196289	BECN2	2	0	2	2	1	1	1	0	1	1	0
ENSG00000197769	MAP1LC3C	38	11	2	31	22	22	11	20	21	27	21
ENSG00000180287	PLD5	1	1	28	27	33	4	1	0	0	11	0
ENSG00000143702	CEP170	466	256	28	1261	1288	1312	750	149	338	351	251
ENSG00000054282	SDCCAG8	1276	991	256	1362	1211	1233	1229	681	833	1030	698
ENSG00000117020	AKT3	1	0	0	8	9	5	2	0	1	1	2
ENSG00000179456	ZBTB18	730	278	123	1424	1109	748	668	531	503	905	459
ENSG00000173728	C1orf100	20	25	0	21	14	23	24	19	9	19	10
ENSG00000035687	ADSS	3412	1659	134	6700	5770	6373	4740	2271	3319	3233	3020
ENSG00000179397	C1orf101	39	32	25	30	33	36	32	38	20	28	26
ENSG00000121644	DESI2	4369	2115	222	7968	7044	6923	4658	3665	3894	4465	3902
ENSG00000203667	COX20	238	88	33	400	336	309	301	109	170	181	124
ENSG00000153187	HNRNPU	43625	32011	12517	53453	48170	46858	39196	30507	31360	36791	29781
ENSG00000203666	EFCAB2	449	311	518	418	333	328	310	192	287	294	203
ENSG00000162849	KIF26B	25	8	32	14	20	24	8	23	27	29	22
ENSG00000185420	SMYD3	1258	1010	852	1700	1399	1773	1676	959	1194	1391	1178
ENSG00000162851	TFB2M	1499	847	59	2312	2066	2085	1571	1197	1432	1491	1269
ENSG00000162852	CNST	1949	1010	147	2800	2398	2685	2074	1423	1743	1815	1489
ENSG00000143653	SCCPDH	2878	1894	609	2927	3040	3694	3012	2140	2491	2647	2462
ENSG00000153207	AHCTF1	8167	7151	132	14991	13339	13796	10306	1157	3573	3601	2789
[truncated: 17,921 more rows]
